# Supplementary material
Source: PubMed Central journal article supplement (PMC3303225)
Supplement: NIHMS352394-supplement-1.pdf [file NIHMS352394-supplement-1.pdf]

## Supplemental Material

### Association between chromosome 9p21 variants and the Ankle-brachial Index identified by a meta-analysis of 21 genome-wide association studies

Joanne M. Murabito, MD, ScM\*<sup>1,2</sup>, Charles C. White, MPH\*<sup>3</sup>, Maryam Kavousi, MD, MSc\*<sup>4,5</sup>, Yan V. Sun, PhD\*<sup>6</sup>, Mary F. Feitosa, PhD\*<sup>7</sup>, Vijay Nambi, MD\*<sup>8</sup>, Claudia Lamina, PhD\*<sup>9</sup>, Arne Schillert, PhD\*<sup>10</sup>, Stefan Coassin, PhD<sup>9</sup>, Joshua C. Bis, PhD<sup>11</sup>, Linda Broer, MSc<sup>4,5</sup>, Dana C. Crawford, PhD<sup>12</sup>, Nora Franceschini, MD, MPH<sup>13</sup>, Ruth Frikke-Schmidt, MD, PhD<sup>14</sup>, Margot Haun, MSc<sup>9</sup>, Suzanne Holewijn, PhD<sup>15</sup>, Jennifer E. Huffman, MSc<sup>16</sup>, Shih-Jen Hwang, PhD<sup>1</sup>, Stefan Kiechl, MD<sup>17</sup>, Barbara Kollerits, PhD, MPH<sup>9</sup>, May E. Montasser, PhD<sup>18</sup>, Ilja M. Nolte, PhD<sup>19</sup>, Megan E. Rudock, PhD<sup>20</sup>, Andrea Senft, MSc<sup>10</sup>, Alexander Teumer, PhD<sup>21</sup>, Pim van der Harst, MD, PhD<sup>22,23</sup>, Veronique Vitart, PhD<sup>16</sup>, Lindsay L. Waite, MS<sup>24</sup>, Andrew R. Wood, MRes<sup>25</sup>, Christina L. Wassel, PhD<sup>26</sup>, Devin M. Absher, PhD<sup>24</sup>, Matthew A. Allison, MD, MPH<sup>26</sup>, Najaf Amin, PhD<sup>4</sup>, Alice Arnold, PhD<sup>27</sup>, Folkert W. Asselbergs MD, PhD<sup>28,29,30</sup>, Yurii Aulchenko, PhD<sup>4</sup>, Stefania Bandinelli, MD<sup>31</sup>, Maja Barbalic, PhD<sup>32</sup>, Mladen Boban, MD, PhD<sup>33</sup>, Kristin Brown-Gentry, MS<sup>34</sup>, David J. Couper, PhD<sup>35</sup>, Michael H. Criqui, MD, MPH<sup>26</sup>, Abbas Dehghan, MD, PhD<sup>4,5</sup>, Martin den Heijer, MD, PhD<sup>36</sup>, Benjamin Dieplinger, MD<sup>37</sup>, Jingzhong Ding, PhD<sup>38</sup>, Marcus Dörr, MD<sup>39</sup>, Christine Espinola-Klein, MD<sup>40</sup>, Stephan B. Felix, MD<sup>39</sup>, Luigi Ferrucci, MD, PhD<sup>41</sup>, Aaron R. Folsom, MD<sup>42</sup>, Gustav Fraedrich, MD<sup>43</sup>, Quince Gibson, MBA<sup>18</sup>, Robert Goodloe, MS<sup>34</sup>, Grgo Gunjaca, MD<sup>33</sup>, Meinhard Haltmayer, MD<sup>37</sup>, Gerardo Heiss, MD, PhD<sup>13</sup>, Albert Hofman, MD, PhD<sup>4,5</sup>, Arne Kieback, MD<sup>39</sup>, Lambertus A. Kiemeny, PhD<sup>44</sup>, Ivana Kolcic, MD, PhD<sup>45</sup>, Iftikhar J. Kullo, MD<sup>46</sup>, Stephen B. Kritchevsky, PhD<sup>38</sup>, Karl J. Lackner, MD<sup>40</sup>, Xiaohui Li, MD, MSc<sup>47</sup>, Wolfgang Lieb, MD, MSc<sup>48</sup>, Kurt Lohman, Mstat<sup>49</sup>, Christa Meisinger, MD, MPH<sup>50</sup>, David Melzer, MD, PhD<sup>51</sup>, Emile R Mohler III, MD<sup>52</sup>, Ivana Mudnic, MD<sup>33</sup>, Thomas Mueller, MD<sup>37</sup>, Gerjan Navis, MD, PhD<sup>53</sup>, Friedrich Oberhollenzer, MD<sup>54</sup>, Jeffrey W. Olin, MD<sup>55</sup>, Jeff O'Connell, PhD<sup>18</sup>, Christopher J. O'Donnell, MD, MPH<sup>1,56</sup>, Walter Palmas, MD, MS<sup>57</sup>, Brenda W. Penninx, PhD<sup>58,59,60</sup>, Astrid Petersmann, MD, PhD<sup>61</sup>, Ozren Polasek, MD, PhD<sup>45</sup>, Bruce M. Psaty, MD, PhD<sup>62,63</sup>, Barbara Rantner, MD, PhD<sup>9,43</sup>, Ken Rice, PhD<sup>27</sup>, Fernando Rivadeneira, MD, PhD<sup>4,5,64</sup>, Jerome I. Rotter, MD<sup>65</sup>, Adrie Seldenrijk, PhD<sup>58</sup>, Marietta Stadler, MD<sup>66</sup>, Monika Summerer, PhD<sup>9</sup>, Toshiko Tanaka, PhD<sup>67</sup>, Anne Tybjaerg-Hansen, MD, DMSc<sup>14</sup>, Andre G. Uitterlinden, PhD<sup>4,5,64</sup>, Wiek H. van Gilst, PhD<sup>22</sup>, Sita H. Vermeulen, PhD<sup>44</sup>, Sarah H. Wild, MB, BChir, PhD<sup>68</sup>, Philipp S. Wild, MD<sup>40,69</sup>, Johann Willeit, MD<sup>17</sup>, Tanja Zeller, PhD<sup>70</sup>, Tatijana Zemunik, MD, PhD<sup>71</sup>, Lina Zgaga, MD, PhD<sup>68,72</sup>, Themistocles L. Assimes, MD, PhD<sup>73</sup>, Stefan Blankenberg, MD<sup>70</sup>, Eric Boerwinkle, PhD<sup>32</sup>, Harry Campbell, MD<sup>68</sup>, John P. Cooke, MD, PhD<sup>73</sup>, Jacqueline de Graaf, MD, PhD<sup>15</sup>, David Herrington, MD, MHS<sup>74</sup>, Sharon L. R. Kardina, PhD<sup>75</sup>, Braxton D. Mitchell, PhD<sup>18</sup>, Anna Murray, PhD<sup>25</sup>, Thomas Münzel, MD<sup>40</sup>, Anne Newman, MD, MPH<sup>76</sup>, Ben A. Oostra, PhD<sup>77</sup>, Igor Rudan, MD, PhD, MPH<sup>68,72</sup>, Alan R. Shuldiner, MD<sup>18,78</sup>, Harold Snieder PhD<sup>19</sup>, Cornelia M. van Duijn, PhD<sup>4,5</sup>, Uwe Völker, PhD<sup>21</sup>, Alan F. Wright, PhD<sup>16</sup>, H.-Erich Wichmann, MD, PhD<sup>79</sup>, James F. Wilson, DPhil<sup>68</sup>, Jacqueline C.M. Witteman, PhD<sup>4,5</sup>, Yongmei Liu, MD, PhD\*<sup>20</sup>, Caroline Hayward, PhD\*<sup>16</sup>, Ingrid B. Borecki, PhD\*<sup>7</sup>, Andreas Ziegler, PhD\*<sup>10</sup>, Kari E. North, PhD\*<sup>13,80</sup>, L. Adrienne Cupples, PhD\*<sup>1,3</sup>, Florian Kronenberg, MD\*<sup>9</sup>.

# 1. Study Specific Phenotype and Genotype Information

## 1.1 Discovery cohorts: non-isolated populations

### 1.1.1 *Atherosclerosis Risk in Communities Study (ARIC)*

The ARIC study is a predominantly bi-racial prospective study of the etiology and natural history of subclinical and clinical atherosclerosis among 15,792 middle-aged men and women, aged 45 to 64 years old at recruitment in 1987 to 1989 <sup>(1)</sup>. Study participants were selected as a probability sample from four US communities: Forsyth Co, NC; Jackson, MS; seven northwestern suburbs of Minneapolis, MN; and Washington Co, MD. African-Americans were over-sampled in Forsyth CO and were exclusively sampled in Jackson. Participants were examined at baseline with collection of medical, social, and demographic data and at three triennial follow-up exams, the last of which occurred in 1999. Annual follow-up continues to ascertain vital status as well as CHD and stroke, including hospitalizations and deaths. GWAS data are available from 8,861 self-identified white ARIC participants.

### 1.1.2 *Cardiovascular Health Study (CHS)*

The CHS is a population-based cohort study of risk factors for CHD and stroke in adults age 65 years and older conducted across four field centers in the United States <sup>(2)</sup>. The original predominantly Caucasian cohort of 5201 persons was recruited in 1989-1990 from a random sample of people on Medicare eligibility lists and an additional 687 African-Americans were enrolled subsequently for a total sample of 5,888.

DNA was extracted from blood samples drawn on all participants at their baseline examination in 1989 to 1990. Genotyping was performed from 2007 to 2008 at the General Clinical Research Center's Phenotyping/Genotyping Laboratory at Cedars- Sinai on the 3,980 CHS participants who had consented to genetic testing and were free of CVD at baseline. A total of 1,908 persons were excluded for lack of available DNA or prevalent coronary heart disease, congestive heart failure, peripheral vascular disease, valvular heart disease, stroke, or transient ischemic attack. Because the other cohorts were predominantly white, the African-American participants were excluded from this analysis to limit the potential for false positive associations due to population stratification, leaving 3397 Caucasians successfully genotyped, 3291 had measures of ABI.

### 1.1.3 *Family Heart Study (FamHS)*

The Family Heart Study (<https://dsgweb.wustl.edu/PROJECTS/MP1.html>) was begun in 1992 with the ascertainment of 1,200 families, half randomly sampled, and half selected because of an excess of coronary heart disease (CHD) or risk factor abnormalities as compared with age- and sex-specific population rates <sup>(3)</sup>. The families, with approximately 6,000 individuals, were sampled on the basis of information on probands from four population-based parent studies: the Framingham Heart Study, the Utah Family Tree Study, and two ARIC centers (Minneapolis, and Forsyth County, NC). A broad range of phenotypes were assessed at a clinic examination (exam 1) in broad domains of CHD, atherosclerosis, cardiac and vascular function, inflammation and hemostasis, lipids and lipoproteins, blood pressure, diabetes and insulin resistance, pulmonary function, and anthropometry. Approximately 8 years later, study participants belonging to the largest pedigrees were invited for a second clinical exam. A total of 2,767 Caucasian subjects in 510 extended families were examined. This sample is the focus of the genome-wide association study (GWAS).

A two-stage design was adopted for the GWAS. In the first stage, 1016 subjects were chosen, equally distributed between the upper and lower quartile of age- and sex-adjusted values for coronary artery calcification, assessed by CT scan. These subjects were chosen to be largely unrelated; 34% of the subjects were from unique families, while 200 other subjects had 1 or more siblings selected into the sample, yielding a sample of 465 unrelated subjects. The remaining family members (n=1,753) will be genotyped in the second stage for replication of the top hits from the first stage.

#### **1.1.4 Framingham Heart Study (FHS)**

The FHS is a National Heart Lung and Blood Institute contract-funded observational cohort study initiated in 1948 to examine the determinants of cardiovascular disease and its risk factors (<http://www.framinghamheartstudy.org/>). The Original Cohort comprised 5,209 men and women, aged 28-62 years at enrollment who have undergone routine biennial examinations <sup>(4,5)</sup>. In 1971, 5,124 Offspring of the Original Cohort participants and Offspring spouses, aged 5 to 70 years, were enrolled into the Framingham Offspring Study and have been examined approximately every 4 years <sup>(6,7)</sup>. In the 1990s, DNA was obtained for genetic studies from surviving Original cohort and Offspring participants. Routine examinations for all FHS cohorts included a standardized physician administered medical history interview and physical examination, direct measurement of cardiovascular risk factors, laboratory assessment, and various questionnaires and noninvasive cardiovascular tests specific to the given examination cycle. Cardiovascular events were adjudicated by a panel of senior investigators using previously reported criteria. FHS examinations were approved by the Institutional Review Board of the Boston University Medical Center and all participants provided written informed consent.

#### **1.1.5 Genetic Epidemiology Network of Arteriopathy Study (GENOA)**

The Family Blood Pressure Program (FBPP), established by the National Heart Lung and Blood Institute in 1996, joined existing research networks that were investigating hypertension and cardiovascular diseases (<http://public.nhlbi.nih.gov/GeneticsGenomics/home/fbpp.aspx>). One of the four FBPP networks is the Genetic Epidemiology Network of Arteriopathy (GENOA), which recruited hypertensive, Caucasian sibships for linkage and association studies to investigate genetic contributions to hypertension and hypertension-related target organ damage. Sibships containing at least two individuals with clinically-diagnosed essential hypertension before age 60 years were recruited from Rochester, Minnesota. After identifying each hypertensive sibship, all members of the sibship were invited to participate regardless of their hypertension status. Informed consent was obtained from all subjects and approval was granted by participating institutional review boards. Participants were diagnosed with hypertension if they had either 1) a previous clinical diagnosis of hypertension by a physician with current anti-hypertensive treatment, or 2) an average systolic blood pressure (SBP)  $\geq 140$  or diastolic blood pressure (DBP)  $\geq 90$  on the second and third clinic visit as stipulated by the Joint National Committee-7 guidelines <sup>(8)</sup>. Exclusion criteria were secondary hypertension, alcoholism or drug abuse, pregnancy, insulin-dependent diabetes mellitus, or active malignancy.

#### **1.1.6 Gutenberg Heart Study (GHS)**

The Gutenberg Health Study (GHS) is designed as a population-based, prospective, observational single-center cohort study in the Rhein-Main-Region in western Mid-Germany to evaluate and improve cardiovascular risk stratification. It also investigates cancer, eye diseases, diseases of the immune system

and the metabolism. The sample was drawn randomly from the governmental local registry offices in the city of Mainz and the district of Mainz-Bingen. The sample was stratified 1:1 for gender and for urban and rural residence with equal strata for decades of age. Individuals between 35 and 74 years of age were enrolled, and written informed consent was obtained from all participants. Exclusion criteria were insufficient knowledge of the German language, and physical or psychological inability to participate in the examinations at the study center. All participants underwent a five hour examination including a biobanking in the study center. Follow-up examinations are carried out after 2.5 and 5 years. The study protocol was approved by the local ethics committee and the local data safety commissioner and the sampling design by the federal data safety commissioners. All subjects gave written informed consent.

#### **1.1.7 Health, Aging, and Body Composition(Health ABC) Study**

The Health Aging and Body Composition (Health ABC) Study is a NIA-sponsored ongoing cohort study of the factors that contribute to incident disability and the decline in function of healthier older persons, with a particular emphasis on changes in body composition in old age. Health ABC enrolled well-functioning, community-dwelling black (n=1281) and white (n=1794) men and women aged 70-79 years between April 1997 and June 1998. Participants were recruited from a random sample of white and all black Medicare eligible residents in the Pittsburgh, PA, and Memphis, TN, metropolitan areas. The key components of Health ABC include a baseline exam, annual follow-up clinical exams, and phone contacts every 6 months to identify major health events and document functional status between clinic visits. GWAS data are available from 1663 white participants.

#### **1.1.8 Invecchiare in Chianti (InCHIANTI) Study**

The InCHIANTI study is a population based longitudinal study designed to investigate the causes of decline in mobility in older subjects <sup>(9)</sup>. The study sample comprises 1,453 individuals of white European descent and is representative of the older population aged 65 years and older supplemented with at least 30 men and 30 women for each 10 year age group from 20 to 70 years from two small towns from the Chianti region in Tuscany, Italy. Interviews were conducted at the participants' homes by three experienced interviewers. Within three weeks, participants attended a study clinic for blood drawing tests, having fasted for at least 8 and just concluded the 24-hour urine collection. On the same day, the participants received a series of medical examinations, including an assessment of the ankle-brachial index. On the second appointment a clinical evaluation and a comprehensive motor and cognitive performances session were performed by an experienced geriatrician and a trained physical therapist, respectively. INRCA Ethical Committee approved the entire study protocol.

#### **1.1.9 and 1.1.10 Cooperative Health Research in the Region of Augsburg, Kooperative Gesundheitsforschung in der region Augsburg (KORA F3, KORA F4)**

The KORA surveys S3 and S4 (Kooperative Gesundheitsforschung in der Region Augsburg <sup>(10)</sup>) are population-based samples drawn from the general population of the South-German city of Augsburg and surrounding counties stratified by age (25 to 74 years) and sex. The follow-ups of these surveys were conducted in 2004/05 (KORA F3) and 2006-2008 (KORA F4). All participants had a German passport, were of European origin and underwent a standardized face-to-face interview by certified medical staff and a standardized medical examination. Genome-wide data are available for a subset of 1,644 subjects randomly chosen from

KORA F3 and for 1814 subjects from KORA F4. ABI-measures were additionally available for n=1,581 (KORA F3) and n=1,407 (KORA F4).

#### **1.1.11. Netherlands Study of Depression and Anxiety (NESDA)**

The Netherlands Study of Depression and Anxiety (NESDA) <sup>(11)</sup>, is a multi-centre study designed to examine the long-term course and consequences of depressive and anxiety disorders (<http://www.nesda.nl>). NESDA included both individuals with depressive and/or anxiety disorders and controls without psychiatric conditions. Inclusion criteria were age 18-65 years and self-reported western European ancestry, exclusion criteria were not being fluent in Dutch and having a primary diagnosis of another psychiatric condition (psychotic disorder, obsessive compulsive disorder, bipolar disorder, or severe substance use disorder).

For all participants DNA was isolated from the baseline blood sample. Through funding from the fNIH GAIN program ([www.fnih.gov/gain](http://www.fnih.gov/gain)), whole genome scan analysis was conducted for 1,859 NESDA (1,702 depressed cases and 157 controls) participants. A hundred subjects were excluded because of various quality control issues <sup>(12)</sup>.

#### **1.1.12 Nijmegen Biomedical Study (NBS)**

The Nijmegen Biomedical Study is a population-based cross-sectional study conducted by the Radboud University Nijmegen Medical Centre <sup>(13)</sup>. Nijmegen is a town in the eastern part of The Netherlands with 156,000 inhabitants, approximately 87% of Caucasian descent. Age and sex stratified randomly selected adult (age 18 years and older) inhabitants of Nijmegen (N=22,452) received an invitation to fill out a postal questionnaire on lifestyle and medical history. A total of 6,434 participants donated blood for DNA-isolation. GWA-data were available for 1,832 participants <sup>(14)</sup>. We invited participants aged 50–70 yrs to come to the hospital and performed ABI at rest and after exercise. In total 1517 participants from the Nijmegen Biomedical Study were included <sup>(15)</sup>. For 544 participants both ABI and GWA-data were available. Approval to conduct the study was obtained from the Institutional Review Board.

#### **1.1.13 and 1.1.14 The Rotterdam Study I and II (RS-I and RS-II)**

The Rotterdam Study is a prospective population-based cohort study to investigate the determinants of chronic diseases among participants aged 55 years and older <sup>(16)</sup>. Briefly, residents of Ommoord, a district of Rotterdam, in the Netherlands, 55 years of age or older, were asked to participate, of whom 7,983 participated (RS-I). The baseline examination was conducted in 1990 -1993 and consisted of a home interview and research center visit for blood samples. In 1999, inhabitants who turned 55 years of age or moved into the study district since the start of the study were invited of whom 3,011 participated (RS-II). In total, at the time of the current Analyses, ABI data were available for 5,169 participants with GWA study data for RS-I and for 1,642 participants from RS-II. The Medical Ethics Committee of Erasmus MC approved the study, and all participants gave informed consent.

#### **1.1.15 Study of Health in Pomerania (SHIP)**

The Study of Health in Pomerania (SHIP) is a population-based survey in West Pomerania, the north-east area of Germany <sup>(17,18)</sup>. A sample from the population aged 20 to 79 years was drawn from population registries. First, the three cities of the region (with 17,076 to 65,977 inhabitants) and the 12 towns (with 1,516 to 3,044 inhabitants) were selected, and then 17 out of 97 smaller towns (with less than 1,500 inhabitants), were drawn at random. Second, from each of the selected communities, subjects were drawn

at random, proportional to the population size of each community and stratified by age and gender. Only individuals with German citizenship and main residency in the study area were included. Finally, 7,008 subjects were sampled, with 292 persons of each gender in each of the twelve five-year age strata. In order to minimize drop-outs by migration or death, subjects were selected in two waves. The net sample (without migrated or deceased persons) comprised 6,267 eligible subjects. Selected persons received a maximum of three written invitations. In case of non-response, letters were followed by a phone call or by home visits if contact by phone was not possible. The SHIP population finally comprised 4,308 participants (corresponding to a final response of 68.7%). Baseline examinations were performed between 1997 and 2001 (SHIP-0). Follow-up examinations were conducted between 2002 and 2006 (SHIP-1) as well as between 2008 and 2012 (SHIP-2). Data for the present analyses were taken from a sample of SHIP-2.

## **1.2 Discovery cohorts: isolated populations**

### **1.2.1 *The Old Order Amish Study (Amish)***

The Old Order Amish individuals included in this study were participants of several ongoing studies of cardiovascular health carried out at the University of Maryland <sup>(19,20)</sup>. Participants were relatively healthy volunteers from the Old Order Amish community of Lancaster County, PA. and their family members. Examinations were conducted at the Amish Research Clinic in Strasburg, PA. All protocols were approved by the Institutional Review Board at the University of Maryland and informed consent was obtained, including permission to use their DNA for genetic studies.

### **1.2.2, 1.2.3 and 1.2.4 *CROATIA-Vis, CROATIA-Korcula and CROATIA-Split***

The CROATIA studies recruited adult individuals within each community irrespective of any specific phenotype. Fasting blood samples were collected, biochemical and physiological measurements taken and questionnaire data for medical history as well as lifestyle and environmental exposures were collected following similar protocols. The CROATIA study conformed to the ethical guidelines of the 1975 Declaration of Helsinki and were approved by appropriate ethics boards with all participants signing informed consent prior to participation.

The CROATIA-Vis study includes 1008 Croatians, aged 18–93 years, who were recruited from the villages of Vis and Komiza on the Dalmatian island of Vis during 2003 and 2004 within a larger genetic epidemiology program. The CROATIA-Korcula study includes 969 Croatians between the ages of 18 and 98. The field work was performed in 2007 and 2008 in the eastern part of the island, targeting healthy volunteers from the town of Korčula and the villages of Lumbarda, Žrnovo and Račišće. The CROATIA-Split study includes 499 Croatians between the ages of 18 and 85 recruited in 2009 from the city of Split.

### **1.2.5 *Erasmus Rucphen Family Study (ERF)***

The Erasmus Rucphen Family study (ERF) is a cross-sectional family-based study. The study population essentially consists of one extended family of descendants from 20 related couples who lived between 1850 and 1900 and had at least 6 children baptized in the community church. The detailed information about ERF can be found elsewhere <sup>(21)</sup>. The Medical Ethical Committee of the Erasmus Medical Center, Rotterdam approved the study and informed consent was obtained from all participants.

### **1.2.6 Orkney Complex Disease Study (ORCADES)**

The Orkney Complex Disease Study (ORCADES) is an ongoing family-based, cross-sectional study in the isolated Scottish archipelago of Orkney. Genetic diversity in this population is decreased compared to Mainland Scotland, consistent with the high levels of endogamy historically. Data for participants aged 18-91 years, from a subgroup of ten islands, were used for this analysis. Fasting blood samples were collected and over 300 health-related phenotypes and environmental exposures were measured in each individual. All participants gave informed consent and the study was approved by Research Ethics Committees in Orkney and Aberdeen.

## **1.3 Replication studies**

### **1.3.1 Bruneck Study**

The Bruneck Study is a prospective, population-based survey on the epidemiology, pathophysiology and prevention of cardiovascular and cerebrovascular disease <sup>(22-26)</sup>. In 1990, 1000 individuals aged 40-79 years were randomly chosen from the inhabitants of the town of Bruneck (South Tyrol, Italy) on the basis of an age- and sex-stratified strategy (125 persons per sex and decade). The population of Bruneck is exclusively Caucasian and of heterogeneous geographic origin with sizeable segments of Austro-German or Italian background. Population mobility within the survey area was low at 0.2% per year. Follow-up examinations were performed in 1995, 2000 and 2005 with participation rates exceeding 90%. Analyses for the current investigation focused on the 1995 evaluation. The study protocol was approved by the pertinent ethics committee, and all participants gave their written informed consent.

### **1.3.2 Copenhagen City Heart Study (CCHS)**

CCHS is a prospective cardiovascular study of the Danish general population initiated in 1976-1978 with follow-up examinations in 1981-1983, 1991-1994 and 2001-03 <sup>(27-29)</sup>. Individuals were selected based on the Central Population Register Code to reflect the adult Danish general population aged 20-80+ years. Blood samples for DNA extraction are available for 10,594 participants. For 5,467 participants of this study ABI measurements are available from the 2001-03 examination.

### **1.3.3 Multi-Ethnic Study of Atherosclerosis (MESA)**

MESA is an NHLBI-sponsored population-based, prospective, multi-center cohort study including participants recruited from six field sites in the United States – Forsyth County, NC (Wake Forest University), Northern Manhattan/Bronx, NY (Columbia University), Baltimore/Baltimore County, MD (Johns Hopkins University), St. Paul, MN (University of Minnesota, Twin Cities), Chicago, IL (Northwestern University), and Los Angeles County, CA (UCLA). Details of recruitment and study design have been previously published elsewhere <sup>(30)</sup>. Briefly, the MESA cohort comprises 6,814 men and women of diverse ethnic background who were 45 to 84 years old at the baseline exam and free of clinically overt cardiovascular disease (CVD) who were recruited to elucidate the determinants and natural history of subclinical CVD, and study progression of subclinical CVD. The cohort is 53% women with an ethnic composition of approximately 40% White, 30% African American, 20% Hispanic and 10% Asian primarily of Chinese descent. The MESA was approved by the Institutional Review Board of all participating field sites and reading centers and participants gave informed consent for participation and use of DNA specimens. Genotyping took place

using the Affymetrix 6.0 array. There were n=2611 participants of European descent who consented the use of DNA for research studies and had imputed GWAS data for the contributed SNPs as well as ABI measurements.

#### **1.3.4 National Health and Nutrition Examination Surveys (NHANES)**

The National Health and Nutrition Examination Surveys (NHANES) are conducted by the National Center on Health Statistics (NCHS) at the Centers for Disease Control and Prevention (CDC). NHANES is a collection of diverse, population-based cross-sectional surveys of non-institutionalized Americans regardless of health status at the time of ascertainment (<http://www.cdc.gov/nchs/nhanes.htm>). NHANES is considered a complex survey given that specific age groups (such as the elderly) and racial/ethnic groups (non-Hispanic blacks and Mexican-Americans) are oversampled. The NHANES data accessed for this work includes NHANES 1999-2000 and NHANES 2000-2001. Collectively, these surveys contain 7,839 DNA samples linked to demographic, health, and lifestyle data. Participants were consented by the CDC at the time of the survey and sample collection, and consent included the storage of data and biological specimens such as blood for future research<sup>(31,32)</sup>. The present study was approved by the CDC Ethics Review Board. Because the study investigators did not have access to personal identifiers, this study was considered non-human subjects research by the Vanderbilt University Internal Review Board.

Race/ethnicity is self-described and was categorized as non-Hispanic white, non-Hispanic black, Mexican-American, and others. Only data for non-Hispanic whites were included here for replication efforts. The ankle brachial pressure index (ABPI), also referred to as the ankle arm blood pressure index (AAI), is a noninvasive technique to measure peripheral vascular disease in population-based and clinical studies. ABPI was defined as the ratio of the systolic blood pressure in the ankle compared with that in the arm. ABPI measurement was performed by a health technician on all adults  $\geq 40$  years of age at interview. Exclusions for these procedures were bilateral amputation, casts, ulcers, dressings, or other conditions which make blood pressure readings at these sites impossible. The presence of these conditions on one limb did not exclude the study participant, but they were excluded if they occurred bilaterally. Systolic pressure was measured in one arm (brachial vessel, right arm if accessible) and both ankles. ABI was defined as the ratio of the systolic blood pressure in the ankle compared with that in the arm. The lower ABI of the two legs was used in the analysis. ABI  $> 1.4$  and equal to 0 were excluded from the analysis. Serum HDL-C, triglycerides, and total cholesterol were measured using standard enzymatic methods. LDL-C was calculated using the Friedewald equation, with missing values assigned for samples with triglyceride levels greater than 400 mg/dl. Fasting status was recorded at time of blood draw. Body mass index was calculated from height and weight measured in the Mobile Examination Center by CDC medical personnel. Current smoking was defined by “do you smoke cigarettes now?” or cotinine levels  $> 15\text{ng/ml}$ . Former smoking was defined among non-current smokers by the answer “yes” to the question “Smoked at least 100 cigarettes in life”. Participants were considered to have type 2 diabetes if they answered “yes” to “Ever been told you have sugar/diabetes?” or if they had fasting blood glucose levels  $> 126\text{ mg/dL}$ . Hypertension was defined if average systolic blood pressure was  $\geq 140$  or average diastolic blood pressure was  $\geq 90$  or if the study participant reported taking medication for high blood pressure. Prevalent cardiovascular disease was defined by “Ever told you had heart attack”. Lipid lowering medication use was defined by “now taking prescribed medicine” to lower cholesterol.



Genotyping was performed for nine SNPs in all of NHANES 1999-2002 (n=7,839) using Sequenom in the Vanderbilt DNA Resources Core. SNPs targeted for genotyping included rs10757269, rs16824978, rs4659996, rs7003385, rs7100623, rs819750, rs9485528. In addition to genotyping experimental NHANES samples, we genotyped blind duplicates provided by CDC. All SNPs reported here save for rs16824978 passed CDC quality control metrics and are available for secondary analyses through NCHS/CDC.

Tests of association were performed unweighted using linear regression, unadjusted and adjusted for covariates as specified in the analysis plan. All statistical analyses were conducted remotely in SAS v9.2 (SAS Institute, Cary, NC) using the Analytic Data Research by Email (ANDRE) portal of the CDC Research Data Center in Hyattsville, MD.

### **1.3.5 PREVEND**

The Prevention of RENal and Vascular ENd stage Disease study is an ongoing prospective study investigating the natural course of increased levels of urinary albumin excretion and its relation to renal and cardiovascular disease. Inhabitants 28 to 75 years of age (N=85,421) in the city of Groningen, The Netherlands, were asked to complete a short questionnaire, 47% responded, and individuals were then selected with a urinary albumin concentration of at least 10 mg/L (N= 7,768) and a randomly selected control group with a urinary albumin concentration less than 10 mg/L (N=3,395). Details of the protocol have been described elsewhere ([www.prevend.org](http://www.prevend.org)). Genotyping was performed in a subset of subjects. All subjects provided written informed consent.

### **1.3.6 Cardiovascular Disease in Intermittent Claudication (CAVASIC) Study**

The CAVASIC Study (CArDioVAScular disease in InterMittent Claudication) is a prospective case-control study which was initiated in 2002 to identify cardiovascular risk factors in patients with intermittent claudication<sup>(33)</sup>. Patients and controls were enrolled in two clinical centers, the Department of Vascular Surgery, Medical University Innsbruck and the 3rd Medical Department of Metabolic Diseases and Nephrology, Hietzing Hospital, Vienna, Austria. Patients were consecutively included in the study when they presented with or had a history of intermittent claudication (PAD IIa or IIb according to the criteria of Fontaine), regardless of whether they had already undergone a treatment procedure (bypass surgery or intervention). Patients were excluded from the study for any of the following: presence of acute or critical limb ischemia (Fontaine III or IV); impaired liver function with elevated enzymes (AST>50U/L, ALT >25U/L, Gamma GT >60U/L); impaired kidney function with serum creatinine >1.5 mg/dL; malignancy; past organ transplantation; therapy with nicotinic acid or corticosteroids. Furthermore controls were recruited from the same geographical region matched for age and presence of type 2 diabetes mellitus (T2DM). All members of the control group volunteered to participate in the study following a public invitation in newspapers. We applied the same exclusion criteria to the control group as used for patients. Controls with symptomatic PAD were excluded, but those with a history of cardiovascular disease were allowed to participate.

Neither the patients nor the controls suffered from acute illnesses or clinically detectable inflammatory processes at the time of enrollment. All subjects provided written informed consent and the examination protocol was approved by the Ethical Committee of the participating study centers. To minimize interobserver bias all interviews and examinations were performed by one physician at each of the two clinical centers who was specially trained in vascular examinations and echocardiography.

### **1.3.7 GENEPAD**

The GENEPAD study was approved by the Institutional Review Boards at Stanford University and Mount Sinai; and registered at <http://clinicaltrials.gov> (NCT 00380185). Participants were recruited from patients undergoing elective, non-emergent coronary angiogram for angina, shortness of breath, abnormal stress test, or known CAD at Stanford University and Mount Sinai Medical Centers between April 2004 and February 2008, for whom the PAD status was not known to the investigators at the time of informed consent and recruitment into the study. This cross-sectional design allowed for two sharply defined phenotypes to emerge (i.e., patients with hemodynamically significant CAD alone, versus those with hemodynamically significant CAD and PAD). Cases were defined as patients with CAD and PAD while controls were defined as subjects with CAD alone. Furthermore, with this study design, confounding clinical covariates (e.g., traditional cardiovascular risk factors) would contribute minimally to the difference between the two phenotypes. This design would maximize our chances for discovery of novel factors that affect the distribution of atherosclerotic plaque. All participants provided written informed consent. Patients admitted for emergent catheterizations, or screening catheterizations prior to organ transplants were excluded. Additional exclusions included being younger than 40 years of age and having a history of radiation treatment, known chronic infectious diseases such as HIV, hepatitis B or C, or a language barrier.

### **1.3.8 Linz Peripheral Arterial Disease (LIPAD) Study**

The LIPAD Study was performed from April 2000 to April 2002 at the St. John of God Hospital, Department of Surgery, Linz, Austria. Of the patients admitted for inpatient evaluation of suspected or definite PAD during the given time interval, all patients with chronic atherosclerotic occlusive disease of the lower extremities associated with typical symptoms were included into this study on the basis of the final clinical diagnosis established by the attending vascular surgeons. The diagnosis was verified by interview, physical examination, noninvasive techniques, and angiography, as detailed below. All cases with acute ischemia were excluded. Further exclusion criteria were PAD caused by nonatherosclerotic causes (cardioembolic disease, thromboangiitis obliterans, vasculitis, or congenital or metabolic vascular disease) and the history or presence of any malignancy. Doppler segmental blood pressure of the lower limbs, including continuous-wave spectral analysis and resting ankle-brachial index (ABI) measurements were performed in all patients with symptomatic PAD and control subjects as previously described<sup>(34)</sup>. In addition to these measurements, intra-arterial aortofemoral angiography was performed in all patients to confirm the presence of PAD and to determine the location and extent of wall changes.

Control subjects were matched to the patients with PAD in a 1:1 design by sex, age ( $\pm 2$  years), and diabetes mellitus status. All control subjects were patients in our hospital and fulfilled the following criteria: no clinical indication of PAD by history and physical examination; ABI  $\geq 1.0$ ; no pathologic pattern of pulse waves in lower limbs by continuous-wave spectral analysis; no CAD; no CVD; no previous vascular surgery or stenting of the internal carotid arteries; no stenosis of the internal carotid artery greater than 50% by color duplex ultrasound scans; no history of venous thromboembolism; and no history or presence of any malignancy. All control subjects were generally in good health and were admitted for treatment of minor health problems, such as cataract surgery, vertebrogenic pain, or nonvascular surgery. The study protocol was approved by the local ethics committee in accordance with the Declaration of Helsinki, and all study participants gave informed consent.

## 2. Bioinformatic Analysis

Data mining in publicly available databases was used to search for biological support for the signals selected for replication. Transcript structure and functional descriptions for every gene located +/- 50 kb from each SNP (+/- 200 kb for intergenic SNPs) were automatically retrieved from different bioinformatic databases (NCBI Entrez RefSeq, EBI SRS, and the UCSC Genome Browser) using Genowatch (now named Variowatch)<sup>(35)</sup> and further supplemented for interesting candidates by ad-hoc searches in OMIM and Pubmed. Additionally, the Genetic Association Database, the NHGRI GWAS Catalog<sup>(36)</sup> and the HuGE Navigator<sup>(37)</sup> database were mined for already known phenotype associations. Finally, in order to refine the functions of genes without clearly associated functions in the public databases pathway, we evaluated the pathway assignments in NCBI Entrez Gene were and used Genomatix Bibliosphere Software (Genomatix GmbH, Munich, Germany) to perform an automated literature and pathway analysis. The generated gene networks were then inspected for relevant tissue types and disease associations using build-in filter functions. However, this approach was inconclusive, probably due to the little data available in PubMed, and was thus not further pursued.

## 3. Statistical methods used for the candidate gene look-up

In the following, the statistical methods used for the look-up of PAD/ABI and CAD candidate genes will be explained in detail, exemplified on the *CYBA* gene region:

1. All SNPs were identified, which lie in the chromosomal region defined by each of the candidate genes ±100 kb upstream or downstream of the gene. In the case of *CYBA*, 138 SNPs lie within this defined region.
2. We then identified the most strongly associated SNP in each gene region using the discovery meta-analysis results for ABI (excluding isolates): for *CYBA* this was rs3794624 with a p-value of 6.30E-05.
3. Since the lowest p-value within each gene region was selected adjusting for multiple testing within each gene region is necessary. Neighboring and densely spaced SNPs are likely to be in high LD. Furthermore, the SNPs are given as genotype scores (allelic dosages between 0 and 2) derived from an imputation algorithm using HapMap. In this situation with high correlation between SNPs, simple Bonferroni correction with the number of SNPs would be too conservative. Therefore, the effective number of loci was calculated for each gene region using an algorithm by Gao et al<sup>(38)</sup>. This method reduces the dimension of the parameter space. In the case of *CYBA*, the 138 SNPs could be explained sufficiently by a linear combination of 58 independent variables. Now, this so called effective number of loci can be used as the denominator in the Bonferroni correction formula. This leads to a corrected p-value of  $6.30E-05 / 58 = 3.60E-03$  for the *CYBA* gene region.
4. So far, we have applied the Bonferroni correction within each gene region separately resulting in gene-region-wide corrected p-values. Since we have looked at 55 independent gene regions, further correction, however, is needed. The False Discovery Rate (FDR<sup>(39)</sup>) was calculated on the 55 corrected p-values. This approach accounts for the multiple comparisons problem. Traditional methods like Bonferroni control the Family-wise error rate, the probability for at least one false positive among all tests. The False discovery rate on the contrary is the expected proportion of false positives amongst all rejected null hypothesis. It has a greater power than the methods controlling the Family-wise error rate

with the higher risk of false positives, however. In our analysis we have set the FDR threshold to 0.1, meaning that we are tolerating 10% of false positives out of the resulting list of significant findings. Since we are only including former PAD/ABI candidate gene regions, we are convinced that the prior knowledge outweighs the higher risk of false positives. For *CYBA*, a FDR of 0.0665 has been calculated.

5. For the CAD candidate genes, we have been looking at the specific reported SNPs rather than complete gene regions. In conclusion, we are sparing us the step of accounting for the number of SNPs within each gene region. Therefore, we are calculating the FDR directly on the p-values derived from the discovery meta-analysis results for ABI.

**Supplementary Table 1. ABI Protocol and Calculation for Discovery Cohorts and Replication Studies**

| Cohort<br>(ABI measurement date)                  | ABI protocol                                                                                                                                                                                                                                                                                                                                                                                                                                             | ABI calculation                                                                                                                                                                                                                          |
|---------------------------------------------------|----------------------------------------------------------------------------------------------------------------------------------------------------------------------------------------------------------------------------------------------------------------------------------------------------------------------------------------------------------------------------------------------------------------------------------------------------------|------------------------------------------------------------------------------------------------------------------------------------------------------------------------------------------------------------------------------------------|
| <b>Discovery Cohorts</b>                          |                                                                                                                                                                                                                                                                                                                                                                                                                                                          |                                                                                                                                                                                                                                          |
| ARIC<br>(1987-1989)                               | Systolic blood pressures were measured with Dinamap 846 Sx automated oscillometric device in one arm and one ankle (posterior tibial artery). <sup>(96)</sup> The ankle was randomly selected and measurement was taken in the supine position. Arm blood pressure was measured in the seated position and usually taken in the right arm. Repeat measures were obtained for the ankle about 5 to 8 minutes apart and for the arm about 5 minutes apart. | Mean systolic blood pressure in the ankle / mean of the seated arm systolic blood pressure                                                                                                                                               |
| CHS<br>(1989-1990)                                | Systolic blood pressure obtained with Doppler stethoscope (8 MHz, Parks Electronics, Aloha, OR) in right arm and both ankles (posterior tibial artery) and duplicate measures obtained for each location. <sup>(97)</sup>                                                                                                                                                                                                                                | The minimum of the mean systolic blood pressure in each ankle / mean of the right arm systolic blood pressure                                                                                                                            |
| FamHS<br>(1994-1995)                              | Systolic blood pressures were measured with Dinamap 1846 Sx automated oscillometric device (Critikon, Inc., Tampa, FL). The ankle was randomly selected and a single systolic blood pressure was taken over the posterior tibial artery with the participant resting in the supine position. After three arm blood pressures were taken over the brachial artery, usually in the right arm, about 5 minutes apart.                                       | Single systolic blood pressure in the ankle / mean of the three right arm systolic blood pressures.                                                                                                                                      |
| FHS<br>(Cohort:1994-1995;<br>Offspring 1995-1998) | Participants rested for a minimum of five minutes in the supine position on the examining table prior to blood pressure measurement. Systolic blood pressure obtained with Doppler device (Parks Medical Electronics, Inc) in both arms and both ankles (posterior tibial artery) and repeat measurement in each limb obtained. <sup>(98,99)</sup> Dorsalis pedis pressure was measured if posterior tibial artery pressure could not be obtained.       | Mean systolic blood pressure in each ankle site / higher of the two brachial systolic blood pressures                                                                                                                                    |
| GENOA<br>(1996)                                   | ABI was measured in the supine position following 5 minutes of rest. Single systolic blood pressure obtained with Doppler device (Medisonics, Minneapolis MN) in both arms and both ankles (posterior tibial artery and dorsalis pedis). <sup>(100)</sup>                                                                                                                                                                                                | Systolic blood pressure in each ankle site (posterior tibial and dorsalis pedis/ higher of the two arm pressures. Lowest of the four ABI ratios was used for analysis. <sup>20</sup>                                                     |
| GHS<br>(2007-2008)                                | ABI was measured in supine position after 10 minutes of rest. Systolic blood pressure was measured at the left arm with a Omron HEM 705-CP II. The peripheral systolic blood pressure was measured at the posterior tibial artery at both ankles with a hand-held 8-MHz Doppler probe (handydop, Elcat) and a conventional aneroid sphygmomanometer.                                                                                                     | To calculate the ABI, the mean systolic blood pressure of the posterior tibial artery at both ankles was divided by the systolic blood pressure of the left arm.                                                                         |
| Health ABC<br>(1997-1998)                         | Arterial systolic blood pressure (SBP) was measured by a hand-held, 8-MHz Doppler probe (Huntleigh Technology, Inc., Manalapan, NJ, USA) placed directly over the artery and a conventional mercury sphygmomanometer. <sup>(42)</sup>                                                                                                                                                                                                                    | Means of the first and second SBP measurements for each leg and right arm were used to attain ABI. ABI was defined as the lowest ratio of SBP of either the right ankle to the right upper-arm or the left ankle to the right upper-arm. |

|                                             |                                                                                                                                                                                                                                                                                                                                                                                                                                                                          |                                                                                                                                                                                                                 |
|---------------------------------------------|--------------------------------------------------------------------------------------------------------------------------------------------------------------------------------------------------------------------------------------------------------------------------------------------------------------------------------------------------------------------------------------------------------------------------------------------------------------------------|-----------------------------------------------------------------------------------------------------------------------------------------------------------------------------------------------------------------|
| InCHIANTI<br>(1998)                         | Systolic blood pressure was obtained with a hand-held Doppler stethoscope (Parks Electronics model 41-A, Aloha, OR) in the right brachial and both posterior tibial arteries with duplicate measurements. <sup>(101)</sup>                                                                                                                                                                                                                                               | The highest systolic pressure at each site was used. The ABI was calculated using the lower of the right and left posterior tibial pressures / brachial artery pressure.                                        |
| KORA F3<br>(2004-2005)                      | Systolic blood pressure obtained with Doppler device (HNE Healthcare, Mini Doppler Modell Nr. D 900) in the right arm and both ankles (posterior tibial artery). We generally performed two measurements and used the mean of the two measurements for further calculations. If we observed a difference of 10 mmHg or more for the two measurements, we performed a third measurement and calculated the mean of the two measurements which were closest to each other. | Mean systolic blood pressure of that ankle side which was lowest / mean of the two brachial systolic blood pressures of the right arm                                                                           |
| KORA F4<br>(2006-2008)                      | Systolic blood pressure obtained with Doppler device (HNE Healthcare, Mini Doppler Modell Nr. D 900) in the right arm and both ankles (posterior tibial artery). We generally performed two measurements and used the mean of the two measurements for further calculations. If we observed a difference of 10 mmHg or more for the two measurements, we performed a third measurement and calculated the mean of the two measurements which were closest to each other. | Mean systolic blood pressure of that ankle side which was lowest / mean of the two brachial systolic blood pressures of the right arm                                                                           |
| NESDA<br>(2004-2007)                        | Both ankle and arm systolic blood pressure was measured by an ultrasound Doppler device at 8-MHz (UltraTech PD1v, Ultrasound Technologies Ltd, Itton, Chepstow, UK) in combination with an ordinary blood pressure cuff, as previously described. Blood pressure was assessed with the respondent in supine position.                                                                                                                                                    | Ankle-brachial index was calculated as the mean of two consecutive systolic right posterior tibial artery blood pressures divided by the mean of two consecutive systolic right humeral artery blood pressures. |
| NBS<br>(2005-2008)                          | To measure ABI appropriately sized cuffs were placed around both arms above the elbow and around both legs just above the ankle. Resting blood pressures were measured at the left and right brachial artery, the left and right posterior tibial, and dorsalis pedis arteries using an 8-MHz hand-held Doppler probe (IMEXDOPCT; Biomedic, Almere, The Netherlands).                                                                                                    | The highest of the two arm pressures was used to calculate ABI at rest for the posterior tibial and dorsalis pedis arteries. The lowest of the four ABI's was used in the analysis.                             |
| RS-I<br>(1990-1993)<br>RS-II<br>(1999-2001) | Two seated blood pressures measured in right arm and a single systolic blood pressure obtained in each leg in supine position (posterior tibial) using Doppler device (Huntleigh 500 D, Huntleigh Technology) <sup>(102)</sup> and random-zero manometer.                                                                                                                                                                                                                | Systolic blood pressure in each ankle / mean of the seated right arm systolic blood pressure. The lowest ABI in either leg was used in the analysis.                                                            |
| SHIP<br>(2008-2009)                         | Systolic blood pressure was measured with a "Dopplex D900" (Huntleigh Healthcare Ltd.) doppler ultrasound probe and a blood pressure cuff (Welch Allyn) in both arms and both ankles (anterior and posterior tibial artery). Measurements were taken in the supine position after at least 10 minutes rest.                                                                                                                                                              | The highest systolic pressure at each ankle site was used. The ABI was calculated using the lower of the right and left tibial pressures / higher of the two brachial artery pressures.                         |

| Discovery Cohorts<br>Population Isolates                                                 |                                                                                                                                                                                                                                                                                                                                                                                                                                                                                                                                                                                                                                                                                                                                                                 |                                                                                                                                                                                                                                                                                                                                   |
|------------------------------------------------------------------------------------------|-----------------------------------------------------------------------------------------------------------------------------------------------------------------------------------------------------------------------------------------------------------------------------------------------------------------------------------------------------------------------------------------------------------------------------------------------------------------------------------------------------------------------------------------------------------------------------------------------------------------------------------------------------------------------------------------------------------------------------------------------------------------|-----------------------------------------------------------------------------------------------------------------------------------------------------------------------------------------------------------------------------------------------------------------------------------------------------------------------------------|
| Amish<br>(2001-2009)                                                                     | Systolic blood pressure was measured with a Doppler ultrasound probe (Hokanson, MD6 Bidirectional Doppler) and a blood pressure cuff (Hokanson blood pressure cuff in two sizes, SC10 and SC12) in both arms and both ankles (anterior and posterior tibial artery). Measurements were taken in the supine position after at least 15 minutes rest.                                                                                                                                                                                                                                                                                                                                                                                                             | The ABI for each leg was calculated separately by dividing the ankle pressure in that leg by the mean brachial pressure of the two arms or the highest of the 2 arms if the difference between the two arms was $\geq 10$ mmHg. Then the mean ABI for both legs was used for analysis.                                            |
| Croatia-Vis<br>(2003-2004)<br>Croatia-Korcula<br>(2007)<br>Croatia- Split<br>(2009-2010) | Participant asked to remove all tight clothing from arms and legs and lie flat for approx 5 min. Brachial measure: sphygmomanometer cuff placed around the right arm just above the elbow. Doppler probe placed over the brachial pulse. Cuff inflated until the Doppler sound disappears then cuff slowly deflated until the sound returns. Repeated on left arm. Ankle measure: Cuff placed around left leg just above the malleolus and Doppler used to locate the dorsalis pedis pulse. Cuff inflated until the Doppler sound disappears then cuff slowly deflated until the sound returns. Repeated for posterior tibial pulse. Both repeated for right leg.                                                                                               | The lowest posterior tibial systolic blood pressure at either ankle was divided by the highest systolic blood pressure in the arm                                                                                                                                                                                                 |
| ERF<br>(2002)                                                                            | Two seated blood pressures measured in right arm and a single systolic blood pressure obtained in each leg (posterior tibial) using Doppler device (Huntleigh 500 D, Huntleigh Technology) <sup>(102)</sup> and random-zero manometer.                                                                                                                                                                                                                                                                                                                                                                                                                                                                                                                          | Systolic blood pressure in each ankle/<br>mean of the seated right arm systolic<br>blood pressure                                                                                                                                                                                                                                 |
| Orcades<br>(2005-2007)                                                                   | Participant asked to remove all tight clothing from arms and legs and lie flat for approx 5 min. Brachial measure: sphygmomanometer cuff placed around the right arm just above the elbow. Doppler probe placed over the brachial pulse. Cuff inflated a further 10-20 mm Hg after the Doppler sound disappears then cuff slowly deflated until the pulse sound returns - measure recorded. Repeated on left arm. Ankle measure: Cuff placed around left leg just above the malleolus and Doppler used to locate the dorsalis pedis pulse. Cuff inflated a further 10-20 mm Hg after the Doppler sound disappears then cuff slowly deflated until the pulse sound returns - measure recorded. Repeated for posterior tibial pulse. Both repeated for right leg. | The lowest posterior tibial systolic blood pressure at either ankle was divided by the highest systolic blood pressure in the arm                                                                                                                                                                                                 |
| Replication Studies                                                                      |                                                                                                                                                                                                                                                                                                                                                                                                                                                                                                                                                                                                                                                                                                                                                                 |                                                                                                                                                                                                                                                                                                                                   |
| Bruneck Study<br>(1995)                                                                  | The ankle-brachial index (ABI) was measured in a supine position. A cuff was inflated to 10 mmHg above systolic blood pressure and deflated at 2 mmHg/s. The first reappearance of the arterial signal at the ankle (posterior tibial artery) was taken as the systolic blood pressure (detected with a Doppler ultrasonic instrument).                                                                                                                                                                                                                                                                                                                                                                                                                         | To calculate the ABI for the right and left leg, the systolic blood pressure at each ankle was divided by the systolic blood pressure in the arm. The higher arm reading (right or left side) was used for ABI calculation. The lower ABI of the two legs was considered in the current analysis. Subjects with an ABI > 1.4 were |

|                        |                                                                                                                                                                                                                                                                                                                                                                                                                                                                                                                                                                                                                                                                                                                                                                                                                                                                                                  |                                                                                                                                                                                                                                                                                                                                                                                                                                                                      |
|------------------------|--------------------------------------------------------------------------------------------------------------------------------------------------------------------------------------------------------------------------------------------------------------------------------------------------------------------------------------------------------------------------------------------------------------------------------------------------------------------------------------------------------------------------------------------------------------------------------------------------------------------------------------------------------------------------------------------------------------------------------------------------------------------------------------------------------------------------------------------------------------------------------------------------|----------------------------------------------------------------------------------------------------------------------------------------------------------------------------------------------------------------------------------------------------------------------------------------------------------------------------------------------------------------------------------------------------------------------------------------------------------------------|
|                        |                                                                                                                                                                                                                                                                                                                                                                                                                                                                                                                                                                                                                                                                                                                                                                                                                                                                                                  | excluded. There was no subject with an ABI of zero on both legs.                                                                                                                                                                                                                                                                                                                                                                                                     |
| CCHS<br>(2001-2003)    | A standard brachial systolic and diastolic blood pressure was recorded on both arms, and systolic ankle blood pressure of the posterior tibial artery on both legs was obtained by Doppler (Huntleigh Mini Dopplex Doppler D900, Huntleigh, United Kingdom).                                                                                                                                                                                                                                                                                                                                                                                                                                                                                                                                                                                                                                     | The ABI was the lowest ankle systolic blood pressure divided by the highest brachial systolic blood pressure.                                                                                                                                                                                                                                                                                                                                                        |
| MESA<br>(2000-2002)    | Systolic blood pressure obtained with Nicolet Doppler apparatus (EN50 LE 100, Nicolet vascular, Golden, CO) in both arms and both ankles (posterior tibial and dorsalis pedis). Approximately 20 elapsed between each pressure.                                                                                                                                                                                                                                                                                                                                                                                                                                                                                                                                                                                                                                                                  | ABI is the minimum of the right and left ABI. The right ABI is calculated as the (maximum of the right dorsalis pedis and right posterior tibial)/ (mean right and left brachial), and the left ABI is calculated as the (maximum of the left dorsalis pedis and left posterior tibial)/ (mean of the left and right brachial). For right ABI and left ABI, if the two brachial (arm) BPs differ by 10 mmHg or more, use the higher arm pressure as the denominator. |
| NHANES<br>(1999-2002)  | The ankle brachial pressure index (ABPI), also referred to as the ankle arm blood pressure index (AAI), is a noninvasive technique to measure peripheral vascular disease in population-based and clinical studies. ABPI was defined as the ratio of the systolic blood pressure in the ankle compared with that in the arm. ABPI measurement was performed by a health technician on all adults $\geq 40$ years of age at interview. Exclusions for these procedures were bilateral amputation, casts, ulcers, dressings, or other conditions which make BP readings at these sites impossible. The presence of these conditions on one limb did not exclude the study participant, but they were excluded if they occurred bilaterally. Systolic pressure was measured in one arm (brachial vessel, right arm if accessible) and both ankles (posterior tibial vessels) for ages 40 and above. | ABI was defined as the ratio of the systolic blood pressure in the ankle compared with that in the arm. The lower ABI of the two legs was used in the analysis. $ABI > 1.4$ and equal to 0 were excluded from the analysis.                                                                                                                                                                                                                                          |
| PREVEND<br>(1997-1998) | At the first visit, while the participant was in a supine position, systolic blood pressure was measured each minute with an automatic Dynamap XL Model 9300 series device at the right brachial artery (ten times total). Within the first 5 min, systolic ankle pressure at each leg was measured at the same time a brachial pressure was performed. For ankle pressure measurements, the posterior tibial artery was measured using an 8-MHz continuous-wave Doppler probe (Huntleigh Model D900, Huntleigh Diagnostics) and a random-zero sphygmomanometer.                                                                                                                                                                                                                                                                                                                                 | The ABI was calculated as the ratio of the systolic blood pressure of the ankle and arm for each leg. The lowest ankle-brachial index in either leg was used in the analysis.                                                                                                                                                                                                                                                                                        |
| CAVASIC<br>(2002)      | For the ABI measurement, the systolic blood pressure was measured in both arms and then two additional measures were obtained on the arm with the higher systolic blood pressure. The systolic blood pressure was obtained three times for both the posterior tibial and dorsalis pedis artery in each leg. <sup>(33)</sup>                                                                                                                                                                                                                                                                                                                                                                                                                                                                                                                                                                      | The mean of the second and third systolic blood pressure measurement at each site was used to calculate the ABI for each of the 4 lower extremity sites. The ABI was calculated as the ratio of the mean systolic blood pressure at each of four sites to the mean systolic blood pressure in the arm.                                                                                                                                                               |



|                        |                                                                                                                                                                                                                                                                                                                                                                                                                                                                                                                                                                                                                                                                             |                                                                                                                                                                                                                                                                                     |
|------------------------|-----------------------------------------------------------------------------------------------------------------------------------------------------------------------------------------------------------------------------------------------------------------------------------------------------------------------------------------------------------------------------------------------------------------------------------------------------------------------------------------------------------------------------------------------------------------------------------------------------------------------------------------------------------------------------|-------------------------------------------------------------------------------------------------------------------------------------------------------------------------------------------------------------------------------------------------------------------------------------|
|                        |                                                                                                                                                                                                                                                                                                                                                                                                                                                                                                                                                                                                                                                                             | The lowest ABI from the four sites was used in analysis.                                                                                                                                                                                                                            |
| GenePAD<br>(2004-2008) | The ABI (i.e. the ratio of ankle and arm systolic blood pressure) was measured using previously established methods. <sup>(103,104)</sup> In brief, prior to undergoing coronary angiogram, each participant rested in the supine position for 5 minutes, then, using a 5-MHz Doppler ultrasound (Nicolet Elite 5-MHz vascular model 110R Doppler; Nicolet Vascular, Golden, CO, USA), systolic pressures were measured in the posterior tibial, dorsalis pedis, and brachial arteries. Each pressure was measured twice in sequential and reverse order as listed. With an IV in one arm, only the contralateral arm was used for the brachial pressures. <sup>(105)</sup> | The ABI for each leg was calculated separately by dividing the higher of the two ankle pressures in that leg by the brachial pressure. If the ABI was less than 0.9 in either leg, the patient was considered to have PAD. The index leg was defined as the leg with the lower ABI. |
| LIPAD<br>(2002)        | ABI measurements in the LIPAD study were done according to <sup>(34)</sup> : with the patient placed in a supine position, the brachial and ankle systolic pressure measurements are obtained.                                                                                                                                                                                                                                                                                                                                                                                                                                                                              | The higher systolic pressure of the anterior tibial or posterior tibial measurement for each foot / the higher of the left and right brachial systolic blood pressure                                                                                                               |

**Supplementary Table 2. Genotyping and Imputation Information for Discovery and Replication Samples (Part 1/3)**

|                           | ARIC                                                                                                                                                                                                                                                                               | CHS                                                                                                                                                    | Family HS                                                                 | FHS                                                                                                                                  | GENOA                                                                                       | GHS                                                                     | Health ABC                                                                  | InCHIANTI                                                           |
|---------------------------|------------------------------------------------------------------------------------------------------------------------------------------------------------------------------------------------------------------------------------------------------------------------------------|--------------------------------------------------------------------------------------------------------------------------------------------------------|---------------------------------------------------------------------------|--------------------------------------------------------------------------------------------------------------------------------------|---------------------------------------------------------------------------------------------|-------------------------------------------------------------------------|-----------------------------------------------------------------------------|---------------------------------------------------------------------|
| Genotyping platform       | Affymetrix Genome-Wide Human SNP Array 6.0                                                                                                                                                                                                                                         | Illumina 370CNV Duo® BeadChip                                                                                                                          | Illumina 550 array, Illumina 610 array, and Illumina 1M array             | Affymetrix 250K Nsp and 250K Sty mapping arrays and the Affymetrix 50K supplemental gene-focused array                               | Affymetrix® Genome-Wide Human SNP Array 6.0                                                 | Affymetrix Genome-Wide Human SNP Array 6.0                              | Illumina Human1M-Duo Array                                                  | Illumina Infinium HumanHap550 array                                 |
| Sample exclusions         | 1) Discordant with previous genotype data<br>2) sex mismatch<br>3) first-degree relative of an included individual based on genotype data;<br>4) genetic outlier as assessed by Identity by state (IBS);<br>5) > 8 SD along any of the first 10 principal components in EIGENSTRAT | 1) call rate<95%;<br>2) sex mismatch;<br>3) other sample failure                                                                                       | 1) sex mismatch;<br>2) outliers identified by the IBS clustering analysis | 1) call rate <97%;<br>2) per subject heterozygosity±5 SDs from the mean;<br>3) per subject large Mendelian error rate                | 1) call rate <95%;<br>2) sex mismatch                                                       | 1) call rate <97%;<br>2) per subject heterozygosity±3 SDs from the mean | 1) sample failure,<br>2) genotypic sex mismatch<br>3) first-degree relative | 1) genotype call rate<98%;<br>2) sex mismatch                       |
| SNP exclusions            | 1) call rate <90%;<br>2) MAF<1%;<br>3) HWE p<10-6;<br>4) SNPs without chromosomal location;<br>5) monomorphic SNPs                                                                                                                                                                 | 1) call rate<0.97;<br>2) >2 replicate errors or Mendelian inconsistencies among reference CEPH trios;<br>3) HWE p<10-5<br>4) no observed heterozygotes | 1) MAF <1%;<br>2) HWE p<10-6;<br>3) SNP call rate <95%;<br>4) rsqhat<0.3  | 1) call rate < 97%;<br>2) Mishap p< 10-9;<br>3) HWE p < 10-6;<br>4) Mendelian errors > 100                                           | 1) call rate <95%;<br>2) monomorphic SNPs;<br>3) MAF<1%;<br>4) unknown chromosomal location | 1) call rate < 98%<br>2) MAF < 1%<br>3) HWE p<10 <sup>-4</sup>          |                                                                             | 1) MAF <1%;<br>2) HWE p<10 <sup>-4</sup> ;<br>3) SNP call rate <98% |
| Imputation method         | MACH (version 1.0.16)                                                                                                                                                                                                                                                              | BIMBAM version 0.99                                                                                                                                    | MACH 1.0                                                                  | MACH (version 1.0.15)                                                                                                                | MACH 1.0.16                                                                                 | IMPUTE v. 1.0.0                                                         | MACH 1.0.16                                                                 | IMPUTE 3.1                                                          |
| Imputation backbone       | BRLMM to Hapmap-V1 CEU from build 35                                                                                                                                                                                                                                               | HapMap CEU using release 22, build 36                                                                                                                  | HapMap release 22 CEU                                                     | HapMap (release 22, build 36, CEU population)                                                                                        | HapMap release 22, build 36, CEU                                                            | HapMap (rel. 22, build 36, CEU pop.                                     | HapMap II (rel. 22, build 36) CEU                                           | HapMap II (rel. 22, build 36) CEU                                   |
| Imputation SNP exclusions | SNPs with <95% data completeness, MAF <1%, HWE P<0.00005                                                                                                                                                                                                                           |                                                                                                                                                        | 1) MAF <1%;<br>2) HWE p<10-6;<br>3) SNP not in HapMap                     | 1) MAF<0.01;<br>2) HWE p<10-6;<br>3) callrate >0.97;<br>4) mishap test of non-random missingness p>10-9;<br>5) <100 Mendelian errors |                                                                                             |                                                                         | MAF<0.01;<br>HWE P<10-6;<br>callrate<97%                                    |                                                                     |
| Statistical software      | PLINK, Mach2QTL                                                                                                                                                                                                                                                                    | R                                                                                                                                                      | SAS proc mixed and GEE                                                    | R packages kinship, GEE                                                                                                              | R packages nlme, MASS                                                                       | SNPTEST                                                                 | R                                                                           | SNPTEST                                                             |

**Supplementary Table 2. Genotyping and Imputation Information for Discovery and Replication Samples (Part 2/3)**

|                           | KORA F3                                     | KORA F4                                     | NESDA                                                                                                    | NBS                                                                                   | RS-I                                                                                                             | RS-II                                                                                                            | SHIP                                       |
|---------------------------|---------------------------------------------|---------------------------------------------|----------------------------------------------------------------------------------------------------------|---------------------------------------------------------------------------------------|------------------------------------------------------------------------------------------------------------------|------------------------------------------------------------------------------------------------------------------|--------------------------------------------|
| Genotyping platform       | Affymetrix GeneChip Human Mapping 500K      | Affymetrix Genome-Wide Human SNP Array 6.0  | Perlegen                                                                                                 | Illumina HumanHapCNV370-Duo-Beadchip                                                  | Illumina 550K array                                                                                              | Illumina 550K array                                                                                              | Affymetrix Genome-Wide Human SNP Array 6.0 |
| Sample exclusions         | 1) sample call rate<93%;<br>2) sex mismatch | 1) sample call rate<93%;<br>2) sex mismatch | call rate<95%, ethnic outliers, XO and XXY samples, high genome-wide homo- or heterozygosity, excess IBS | 1) call rate < 96%;<br>2) <90% Caucasian ancestry as identified by Structure analysis | 1) excess autosomal heterozygosity;<br>2) sex mismatch;<br>3) outliers identified by the IBS clustering analysis | 1) excess autosomal heterozygosity;<br>2) sex mismatch;<br>3) outliers identified by the IBS clustering analysis | 1) call rate<92%;<br>2) sex mismatch;      |
| SNP exclusions            |                                             |                                             | callrate <95%,<br>MAF<1%                                                                                 |                                                                                       | 1) MAF <1%;<br>2) HWE p<10-6;<br>3) SNP call rate <98%                                                           | 1) MAF <1%;<br>2) HWE p<10-5;<br>3) SNP call rate <90%                                                           | NA                                         |
| Imputation method         | Mach 1.0.10                                 | Mach 1.0.16                                 | Impute 0.4.2                                                                                             | Impute 0.5.0                                                                          | MACH 1.0                                                                                                         | MACH 1.0.15                                                                                                      | IMPUTE 0.5.0                               |
| Imputation backbone       | HapMap (release 21, build 35, CEU)          | HapMap (release 22, build 36, CEU)          | HapMap Phase II - release 22 build 36, CEU                                                               | HapMap Phase II - release 22 build 36, CEU                                            | HapMap release 22 CEU                                                                                            | HapMap release 22 CEU                                                                                            | HapMap release 22 CEU                      |
| Imputation SNP exclusions | MAF <5%                                     | genotype callrate<93%                       | MAF<0.01; HWE P<10-6; callrate<95%                                                                       | 1) call rate <96%<br>2) MAF <1%<br>3) HWE p<10 <sup>-6</sup>                          | 1) MAF <1%;<br>2) HWE p<10-6;<br>3) SNP call rate <98%                                                           | 1) MAF <1%;<br>2) HWE p<10-6;<br>3) SNP call rate <98%                                                           | NA                                         |
| Statistical software      | Mach2QTL                                    | Mach2QTL                                    | SNPTEST v1.1.4; R                                                                                        | SNPTEST v 1.1.5                                                                       | ProbABEL (version 1.1) *                                                                                         | ProbABEL (version 1.1) *                                                                                         | QUICKTEST version 0.95                     |

\* (<http://mga.bionet.nsc.ru/~yurii/ABEL/>).

**Supplementary Methods Table 2. Genotyping and Imputation Information for Discovery and Replication Samples (Part 3/3)**

|                           | Population Isolates                                                           |                                                                                                                                                        |                                                                                                                                                        |                                                                                                                                                        |                                                                                                                  |                                                                                                                                                        | Replication Studies*                                         |                                                                               |
|---------------------------|-------------------------------------------------------------------------------|--------------------------------------------------------------------------------------------------------------------------------------------------------|--------------------------------------------------------------------------------------------------------------------------------------------------------|--------------------------------------------------------------------------------------------------------------------------------------------------------|------------------------------------------------------------------------------------------------------------------|--------------------------------------------------------------------------------------------------------------------------------------------------------|--------------------------------------------------------------|-------------------------------------------------------------------------------|
|                           | Amish                                                                         | Croatia-Vis                                                                                                                                            | Croatia-Korcula                                                                                                                                        | Croatia- Split                                                                                                                                         | ERF                                                                                                              | Orcades                                                                                                                                                | MESA                                                         | PREVEND                                                                       |
| Genotyping platform       | Affymetrix GeneChip Human Mapping 500K                                        | Illumina HumanHap300v1                                                                                                                                 | Illumina 370CNV                                                                                                                                        | Illumina 370CNV                                                                                                                                        | Illumina 6K (n=3000), 318K (n=1200), 370K (n=100), Affymetrix 250K (n=200)                                       | Illumina HumanHap300v2                                                                                                                                 | Affymetrix 6.0 1M                                            | Illumina CytoSNP12 V2                                                         |
| Sample exclusions         | 1) sample call rate<93%;<br>2) sex mismatch<br>3) excess Mendelian error rate | discrepancies between sex in phenotype file and genotyping; too high autosomal heterozygosity (FDR<1%); too high IBS sharing (>=95%); call rate (<97%) | discrepancies between sex in phenotype file and genotyping; too high autosomal heterozygosity (FDR<1%); too high IBS sharing (>=95%); call rate (<97%) | discrepancies between sex in phenotype file and genotyping; too high autosomal heterozygosity (FDR<1%); too high IBS sharing (>=95%); call rate (<97%) | 1) excess autosomal heterozygosity;<br>2) sex mismatch;<br>3) outliers identified by the IBS clustering analysis | discrepancies between sex in phenotype file and genotyping; too high autosomal heterozygosity (FDR<1%); too high IBS sharing (>=95%); call rate (<97%) | 1) gender mismatches and<br>2) cryptic duplicates            | 3SD phenotypic outliers, duplicates, contaminated, relatedness, gender mismat |
| SNP exclusions            | 1) MAF <1%;<br>2) HWE p<10-6;<br>3) SNP call rate <95%                        | MAF<0.02, Call Rate 98%, pHWE < 1E-10                                                                                                                  | MAF<0.02, Call Rate 98%, pHWE <1E-10                                                                                                                   | MAF<0.02, Call Rate 98%, pHWE <1E-10                                                                                                                   | 1) MAF <1%;<br>2) HWE p<10-6;<br>3) SNP call rate <95%                                                           | MAF<0.02, Call Rate 98%, pHWE <1E-10                                                                                                                   | None required for 7 SNPs requested                           | SNP call rate <95%; MAF < 0.01; HWE p< 1 x 10-5                               |
| Imputation method         | MACH v-1.0.16                                                                 | MACH (1.0.16)                                                                                                                                          | MACH (1.0.16)                                                                                                                                          | MACH (1.0.16)                                                                                                                                          | MACH 1.0                                                                                                         | MACH (1.0.16)                                                                                                                                          | IMPUTE V2.1.0                                                | BEAGLE v3.1.0                                                                 |
| Imputation backbone       | HapMap (release 22, build 36, CEU population)                                 | HapMap r22 CEU                                                                                                                                         | HapMap r22 CEU                                                                                                                                         | HapMap r22 CEU                                                                                                                                         | HapMap release 22 CEU                                                                                            | HapMap r22 CEU                                                                                                                                         | HapMap Phase I and II - CEU, rel. 24 - Build 36 (dbSNP b126) | Hapmap rel 23a CEU                                                            |
| Imputation SNP exclusions | 1) MAF <1%;<br>2) HWE p<10-6;<br>3) SNP call rate <95%                        | MAF<0.01, Call Rate 98%, pHWE < 1E-06                                                                                                                  | MAF<0.01, Call Rate 98%, pHWE < 1E-06                                                                                                                  | MAF<0.01, Call Rate 98%, pHWE < 1E-06                                                                                                                  | MAF<0.01, Call Rate 98%, pHWE < 1E-06                                                                            | None required for 7 SNPs requested                                                                                                                     |                                                              | 1) MAF <1%;<br>2) HWE p<10-6;<br>3) SNP call rate <95%                        |
| Statistical software      | MMAP                                                                          | GenABEL/ProbABEL                                                                                                                                       | GenABEL/ProbABEL                                                                                                                                       | GenABEL/ProbABEL                                                                                                                                       | PROBabel: with mmscore                                                                                           | GenABEL/ProbABEL                                                                                                                                       | SNPTEST                                                      | PLINK v1.07                                                                   |

\*Genotyping of the replication samples from the Bruneck Study, Copenhagen City Heart Study, CAVASIC Study and LIPAD Study was performed using 5' nuclease allelic discrimination (Taqman) assays. Genotyping of the replication samples from NHANES was performed using Sequenom.

**Supplementary Table 3: Relative excess heterozygosity analysis of SNPs in replication studies**

| SNP        | lnREH_Fixed | P_Fixed | CI_Fixed       | lnREH_Random | P_Random | CI_Random     | I2     | I2_CI        |
|------------|-------------|---------|----------------|--------------|----------|---------------|--------|--------------|
| rs10757269 | 0.0138      | 0.4582  | [-0.02, 0.05]  | -0.0027      | 0.9281   | [-0.06, 0.06] | 0.4675 | [0.00, 0.79] |
| rs4659996  | -0.0154     | 0.4073  | [-0.05, 0.02]  | -0.0297      | 0.2695   | [-0.08, 0.02] | 0.3645 | [0.00, 0.75] |
| rs7003385  | 0.0049      | 0.8142  | [-0.04, 0.05]  | 0.0049       | 0.8142   | [-0.04, 0.05] | 0.0000 | [0.00, 0.07] |
| rs9485528  | 0.0184      | 0.5797  | [-0.05, 0.08]  | 0.0184       | 0.5797   | [-0.05, 0.08] | 0.0000 | [0.00, 0.71] |
| rs819750   | -0.0262     | 0.5384  | [-0.11, 0.06]  | -0.0262      | 0.5384   | [-0.11, 0.06] | 0.0000 | [0.00, 0.48] |
| rs16824978 | 0.0018      | 0.9443  | [-0.05, 0.05]  | 0.0018       | 0.9443   | [-0.05, 0.05] | 0.0000 | [0.00, 0.68] |
| rs7100623  | -0.0952     | 0.0014  | [-0.15, -0.04] | -0.0773      | 0.1140   | [-0.17, 0.02] | 0.5305 | [0.00, 0.81] |

**Supplementary Table 4. Characteristics of Discovery Cohort Participants at time of Ankle-brachial Index Measurement (Part 1/3)**

| <b>Characteristic,<br/>Mean (SD) or N (%)</b> | <b>ARIC</b>  | <b>CHS</b>   | <b>FamHS</b>  | <b>FHS</b>    | <b>GENOA</b> | <b>GHS</b>   | <b>Health ABC</b> | <b>InCHIANTI</b> |
|-----------------------------------------------|--------------|--------------|---------------|---------------|--------------|--------------|-------------------|------------------|
| N                                             | 7630         | 3193         | 1736          | 3572          | 991          | 3122         | 1562              | 1130             |
| Years ABI obtained                            | 1987-1989    | 1989 - 1990  | 1994 - 1995   | 1994-1998     | 2001-2004    | 2007-2008    | 1997-1998         | 1998-2000        |
| Age, years, mean (SD)                         | 54.3 (5.7)   | 72.3 (5.4)   | 50.0 (12.9)   | 61.6 (11.8)   | 58.6 (10.1)  | 55.8 (10.9)  | 73.8 (2.8)        | 67.6 (15.3)      |
| Women, n (%)                                  | 4073(53.4)   | 1950 (61.1)  | 941 (54.2)    | 1950 (54.6)   | 564 (56.9)   | 1533 (49.1)  | 743 (47.6)        | 613 (55.0)       |
| ABI, mean (SD)                                | 1.12 (0.13)  | 1.08 (0.14)  | 1.19 (0.12)   | 1.1 (0.13)    | 1.1 (0.14)   | 1.02 (0.12)  | 1.09 (0.16)       | 1.04 (0.15)      |
| PAD = ABI $\leq$ 0.9, n (%)                   | 287 (3.8)    | 264 (8.3)    | 41 (2.4)      | 194 (5.4)     | 66 (6.7)     | 405 (13.0)   | 148 (9.5)         | 116 (10.4)       |
| ABI = 0.91 to 1.10, n (%)                     | 2886 (37.8)  | 1345 (42.1)  | 309 (18.7)    | 1214 (34.0)   | 387 (39.1)   | 1941 (62.2)  | 593 (42.0)        | 670 (60.1)       |
| Hypertension, n (%)                           | 1693 (22.3)  | 1011 (31.7)  | 400 (23.0)    | 1607 (45.0)   | 717 (72.4)   | 1640 (52.5)  | 727 (46.8)        | 338 (30.8)       |
| Diabetes, n (%)                               | 646 (8.5)    | 370 (11.7)   | 89 (5.2)      | 334 (9.4)     | 148 (14.9)   | 220 (7.0)    | 163 (10.5)        | 73 (6.7)         |
| Current smoker, n (%)                         | 1924 (25.2)  | 361 (11.3)   | 223 (13.2)    | 507 (14.3)    | 103 (10.4)   | 574 (18.4)   | 101 (6.5)         | 214 (19.2)       |
| Former smoker, n (%)                          | 2700 (35.4)  | 1306 (40.9)  | 734 (42.5)    | 1683 (47.5)   | 389 (39.3)   | 1096 (35.2)  | 796 (51.0)        | 282 (25.2)       |
| Total cholesterol, mg/dL                      | 214.9 (40.7) | 213.2 (38.9) | 202.4 (40.0)  | 206.0 (39.3)  | 197.1 (33.8) | 224.5 (41.3) | 201.4 (37.6)      | 216.0 (39.9)     |
| HDL cholesterol, mg/dL                        | 50.7 (16.9)  | 55.4 (15.9)  | 50.1 (14.6)   | 51.0 (16.2)   | 51.8 (15.1)  | 57.0 (16.0)  | 52.1 (16.4)       | 56.1 (15.1)      |
| Triglyceride, mg/dL                           | 137.2 (91.7) | 139.9 (75.7) | 148.7 (102.8) | 141.7 (135.4) | 157.0 (98.1) | 125.6 (73.9) | 152.8 (86.8)      | 126.3 (78.6)     |
| BMI, kg/m <sup>2</sup>                        | 27.0 (4.8)   | 26.3 (4.4)   | 27.3 (5.1)    | 27.7 (5.0)    | 30.7 (6.2)   | 27.1 (4.7)   | 26.6 (4.1)        | 27.1 (4.1)       |
| Claudication, n (%)                           | 63 (0.8)     | 37 (1.2)     | NA            | 131 (3.7)     | NA           | 249 (8.0)    | 293 (18.9)        | 87 (7.9)         |
| Prevalent CVD, n (%)                          | 381 (5.1)    | 0            | 155 (8.9)     | 217 (6.1)     | 86 (8.7)     | 214 (6.9)    | 404 (26.3)        | 63 (5.7)         |

NA, not available

**Supplementary Table 4. Characteristics of Discovery Cohort Participants at time of Ankle-brachial Index Measurement (Part 2/3)**

| <b>Characteristic,<br/>Mean (SD) or N (%)</b> | <b>KORA F3</b> | <b>KORA F4</b> | <b>NESDA</b> | <b>NBS</b>   | <b>RS-I</b>  | <b>RS-II</b> | <b>SHIP</b>   |
|-----------------------------------------------|----------------|----------------|--------------|--------------|--------------|--------------|---------------|
| N                                             | 1581           | 1407           | 1612         | 544          | 5169         | 1642         | 543           |
| Years ABI obtained                            | 2004-2005      | 2006-2008      | 2004-2007    | 2005-2008    | 1991-1993    | 2000-2001    | 2008-2009     |
| Age, years, mean (SD)                         | 62.2 (10.1)    | 63.4 (7.2)     | 41.8 (12.4)  | 62.8 (5.4)   | 69.1 (9.0)   | 64.3 (7.7)   | 58.6 (13.0)   |
| Women, n (%)                                  | 821 (51.9)     | 730 (51.9)     | 1112 (69.0)  | 279 51.3     | 3091 (59.8)  | 885 (53.9)   | 280 (51.6)    |
| ABI, mean (SD)                                | 1.12 (0.13)    | 1.14 (0.14)    | 1.14 (0.12)  | 1.09 (0.10)  | 1.05 (0.21)  | 1.06 (0.14)  | 1.12 (0.13)   |
| PAD = ABI $\leq$ 0.9, n (%)                   | 81 (5.1)       | 75 (5.3)       | 36 (2.2)     | 17 (3.13)    | 959 (18.6)   | 176 (10.7)   | 18 (3.32)     |
| ABI = 0.91 to 1.10, n (%)                     | 621 (39.3)     | 397 (28.2)     | 581 (36.9)   | 295 (56.0)   | 1786 (34.6)  | 808 (49.2)   | 225 (41.4)    |
| Hypertension, n (%)                           | 950 (60.4)     | 696 (49.6)     | 614 (38.1)   | 220 (40.4)   | 2912 (56.3)  | 935 (56.9)   | 299 (55.1)    |
| Diabetes, n (%)                               | 166 (10.5)     | 140 (10.0)     | 45 (2.8)     | 42 (7.7)     | 528 (10.2)   | 166 (10.1)   | 57 (10.5)     |
| Current smoker, n (%)                         | 214 (13.6)     | 195 (13.9)     | 670 (41.6)   | 83 (15.3)    | 1150 (22.2)  | 330 (20.1)   | 77 (14.2)     |
| Former smoker, n (%)                          | 569 (36.0)     | 583 (41.5)     | 512 (31.8)   | 273 (50.3)   | 2118 (41.0)  | 820 (49.9)   | 243 (44.8)    |
| Total cholesterol, mg/dL                      | 221.5 (40.4)   | 224.1 (39.6)   | 198.9 (41.4) | 228.2 (38.7) | 255.5 (47.0) | 224.7 (37.9) | 212.3 (42.2)  |
| HDL cholesterol, mg/dL                        | 58.2 (17.0)    | 56.5 (14.4)    | 63.1 (16.9)  | 54.5 (14.7)  | 51.9 (14.3)  | 53.4 (14.3)  | 54.5 (14.1)   |
| Triglyceride, mg/dL                           | 171.2 (121.9)  | 135.6 (96.1)   | 114.6 (77.6) | 127.5 (67.3) | NA           | NA           | 161.2 (111.7) |
| BMI, kg/m <sup>2</sup>                        | 28.1 (4.5)     | 28.5 (4.8)     | 25.5 (4.9)   | 26.9 (3.9)   | 26.3 (3.7)   | 27.2 (4.2)   | 28.16 (4.4)   |
| Claudication, n (%)                           | 63 (3.99)      | 56 (3.98)      | 333 (20.7)*  | N/A          | 88 (1.7)     | 19 (1.2%)    | 50 (9.2)      |
| Prevalent CVD, n (%)                          | 173 (10.94)    | 163 (11.58)    | 50 (3.1)     | 19 (3.5)     | 833 (16.1)   | 149 (9.1%)   | 75 (13.8)     |

NA, not available

\* Question asked was: "Do you have pain in one or both calves during walking?"

**Supplementary Table 4. Characteristics of Discovery Cohort Participants from population isolates at time of Ankle-brachial Index Measurement (Part 3/3)**

| <b>Characteristic,<br/>Mean (SD) or N (%)</b> | <b>Amish</b> | <b>ERF</b>   | <b>CROATIA-Vis</b> | <b>CROATIA-Korcula</b> | <b>Orcades</b> | <b>CROATIA-Split</b> |
|-----------------------------------------------|--------------|--------------|--------------------|------------------------|----------------|----------------------|
| N                                             | 1183         | 2133         | 897                | 851                    | 693            | 499                  |
| Years ABI obtained                            | 2001-2009    | 2002         | 2003-2004          | 2007                   | 2005-2007      | 2009-2010            |
| Age, years, mean (SD)                         | 49.0 (16.5)  | 49.7 (15.2)  | 56.1 (15.4)        | 55.93 (13.33)          | 53.74(15.31)   | 49.04 (14.65)        |
| Women, n (%)                                  | 577 (48.8)   | 1309 (56.9)  | 518 (57.7)         | 542 (63.7)             | 372(53.7)      | 286 (57.3)           |
| ABI, mean (SD)                                | 1.09 (0.11)  | 1.05 (0.13)  | 1.10 (0.12)        | 1.02 (0.14)            | 1.03 (0.11)    | 1.03 (0.10)          |
| PAD = ABI<0.9, n (%)                          | 54 (4.6)     | 180 (8.5)    | 37 (4.1)           | 146 (17.2)             | 59 (8.5)       | 50 (10)              |
| ABI = 0.91 to 1.10, n (%)                     | 553 (46.8)   | 1195 (56.0)  | 464 (51.7)         | 494 (58.0)             | 468 (67.5)     | 346 (69.3)           |
| Hypertension, n (%)                           | 153 (12.9)   | 637 (29.0)   | 196 (21.9)         | 328 ( 38.5)            | 153 (22.1)     | 122 (24.4)           |
| Diabetes, n (%)                               | 19 (1.6)     | 108 (5.0)    | 55 (6.1)           | 83 (9.8)               | 15 (2.2)       | 16 (3.2)             |
| Current smoker, n (%)                         | 111 (9.7)    | 869 (39.8)   | 212 (23.6)         | 179 (21.0)             | 60 (8.7)       | 126 (25.3)           |
| Former smoker, n (%)                          | 162 (14.2)   | 653 (29.9)   | 229 (25.5)         | 224 (26.3)             | 233 (33.6)     | 138 (27.7)           |
| Total cholesterol, mg/dL                      | 211 (47.7)   | 214.5 (42.7) | 197.2 (37.9)       | 229.3 (47.6)           | 224.3 (45.2)   | 227.4 (48.8)         |
| HDL cholesterol, mg/dL                        | 55.6 (14.6)  | 49.4 (14.1)  | 42.9 (6.2)         | 56.5 (13.5)            | 64.6 (15.5)    | 53.4 (12.9)          |
| Triglyceride, mg/dL                           | 75.6 (47.3)  | 119.3 (68.9) | 150.6 (87.7)       | 126.7 (73.5)           | 117.8 (58.5)   | 133.5 (93.1)         |
| BMI, kg/m <sup>2</sup>                        | 27.0 (4.7)   | 26.9 (4.8)   | 27.3 (4.3)         | 28.0 (4.1)             | 27.8 (4.9)     | 26.9 (4.2)           |
| Claudication, n (%)                           | NA           | 43 (2.0)     | NA                 | NA                     | NA             | NA                   |
| Prevalent CVD, n (%)                          | 50 (4.4)     | 48 (2.1)     | 27 (3.0)           | 11 (1.3)               | 52 (7.5)       | 4 (0.8)              |

NA, not available



**Supplementary Table 5. Characteristics of the Replication Samples at the time of Ankle Brachial Index Measurement**

| <b>Characteristic,<br/>Mean (SD) or N (%)</b> | Bruneck<br>Study | CCHS          | NHANES         | MESA         | PREVEND      | CAVASIC<br>cases | CAVASIC<br>controls | GenePAD   | LIPAD<br>cases | LIPAD<br>controls |
|-----------------------------------------------|------------------|---------------|----------------|--------------|--------------|------------------|---------------------|-----------|----------------|-------------------|
| N                                             | 786              | 5330          | 2375           | 2611         | 3691         | 136              | 307                 | 850       | 279            | 392               |
| Years ABI obtained                            | 1995             | 2001-2003     | 1999-2002      | 2000-2002    | 1997-1998    | 2002-2006        | 2002-2006           | 2004-2008 | 2000-2002      | 2000-2002         |
| Age, years, mean (SD)                         | 62.4 (11.0)      | 59.1 (16.0)   | 61.95(13.53)   | 62.7 (10.2)  | 49.4 (12.5)  | 59 (7)           | 57 (10)             | 68 (11)   | 68 (11)        | 67 (11)           |
| Women, n (%)                                  | 397 (50.5)       | 57.5          | 1128(47.49)    | 1360 (52.1)  | 1791 (48.5)  | 0 (0)            | 0 (0)               | 258 (30)  | 87 (31)        | 121 (31)          |
| ABI, mean (SD)                                | 1.10 (0.15)      | 1.01 (0.15)   | 1.09(0.14)     | 1.11 (0.12)  | 1.16 (0.14)  | 0.7 (0.3)        | 1.1 (0.1)           | 1.0 (0.2) | 0.7 (0.2)      | 1.2 (0.1)         |
| PAD = ABI<0.9, n (%)                          | 79 (10.1)        | 959 (18.0)    | 202 (8.5%)     | 82 (3.1)     | 135 (3.7)    | 106 (78)         | 19 (6)              | 153 (18)  | 239 (86)       | 0 (0)             |
| ABI = 0.91 to 1.10, n (%)                     | 321 (40.8)       | 2974 (55.8)   | 917(38.6)      | 926 (35.5)   | 802 (21.7)   | 15 (11)          | 161 (52)            |           | 22 (8)         | 121 (31)          |
| Hypertension, n (%)                           | 535 (68.1)       | 2703 (50.7)   | 1162(49.6%)    | 1000 (38.3)  | 1232 (33.4)  | 119 (88)         | 195 (64)            | 445 (52)  | 165 (59)       | 159 (41)          |
| Diabetes, n (%)                               | 80 (10.2)        | 327 (6.1)     | 188(8.01%)     | 116 (4.4)    | 139 (3.8)    | 15 (11)          | 97 (32)             | 125 (15)  | 89 (32)        | 105 (27)          |
| Current smoker, n (%)                         | 158 (20.1)       | 1736 (32.7)   | 529(22.3%)     | 296 (11.3)   | 1335 (36.1)  | 73 (55)          | 39 (13)             | NA        | 125 (45)       | 51 (13)           |
| Former smoker, n (%)                          | 203 (25.8)       | 1847 (51.9)   | 908(38.2%)     | 1156 (44.3)  | 1327 (36.0)  | 54 (40)          | 140 (46)            | NA        | 20 (7)         | 24 (6)            |
| Ever smoker, n (%)                            | 361 (45.9)       |               | 1361(57.3%)    | 1451 (55.6)  | NA           | 127 (95)         | 179 (58)            | 511 (60)  | 145 (52)       | 75 (19)           |
| Total cholesterol, mg/dL                      | 223.2 (44.6)     | 212.9 (45.3)  | 208.71(39.18)  | 195.7 (35.5) | 217.6 (42.5) | 208 (43)         | 205 (35)            | 117 (40)  | 232 (52)       | 214 (44)          |
| HDL cholesterol, mg/dL                        | 56.6 (13.7)      | 57.1 (18.6)   | 52.44(16.35)   | 52.4 (15.7)  | 50.3 (15.2)  | 50 (13)          | 59 (17)             | 40 (12)   | 52 (16)        | 54 (17)           |
| Triglyceride, mg/dL                           | 135.6 (90.1)     | 137.9 (118.9) | 162.95(154.84) | 132.3 (89.1) | 131.2 (89.5) | 165 (98)         | 131 (74)            | 108 (68)  | 163 (102)      | 134 (76)          |
| Lipid lowering meds, n (%)                    | 24 (3.1)         | 296 (5.6)     | 415(17.5%)     | 488 (18.7)   | (4.1)        | 51 (38)          | 60 (20)             | 689 (81)  | 56 (20)        | 0 (0)             |
| BMI, kg/m <sup>2</sup>                        | 25.6 (3.8)       | 25.8 (4.3)    | 27.94(5.45)    | 27.8 ± 5.1   | 26.1 (4.2)   | 27 (4)           | 27 (4)              | 29 (6)    | 26 (4)         | 27 (4)            |
| Claudication, n (%)                           | 35 (4.5)         | NA            | NA             | 10 (0.38)    | NA           | 136 (100)        | 0 (0)               | 85 (10)   | 236 (85)       | 0 (0)             |
| Prevalent CVD, n (%)                          | 109 (13.9)       | 702 (13.1)    | 169(7.2)       | 0 (0)        | 143 (3.9)    | 39 (29)          | 29 (9)              | 520 (61)  | 116 (42)       | 0 (0)             |

NA, not available

**Supplementary Table 6: Overall Meta-analysis Results and Study Specific Results: ABI-SNP Associations with  $p < 10^{-5}$ , population isolates excluded**

**Table is at the end of this document**

**Supplementary Table 7. Meta-analysis results: ABI-SNP associations with  $p < 10^{-5}$  in the primary discovery analysis with population isolates included.**

| SNP         | Chr | Physical Position | Closest Gene        | Risk / Non-risk Allele | Risk Allele frequency | Meta-analysis              | N            | Beta           | SE            | P value         | P <sub>het</sub> |
|-------------|-----|-------------------|---------------------|------------------------|-----------------------|----------------------------|--------------|----------------|---------------|-----------------|------------------|
| rs10757269  | 9   | 22062264          | CDKN2B              | G/A                    | 0.50                  | ABI Discovery              | 41292        | -0.0048        | 0.0009        | 1.22E-07        | 0.01             |
|             |     |                   |                     |                        |                       | ABI Replication            | 16672        | -0.0035        | 0.0015        | 1.76E-02        | 0.67             |
|             |     |                   |                     |                        |                       | <b>ABI Combined</b>        | <b>57964</b> | <b>-0.0045</b> | <b>0.0008</b> | <b>8.82E-09</b> | <b>0.04</b>      |
|             |     |                   |                     |                        |                       | PAD <sup>†</sup> Discovery | 39600        | 0.0686         | 0.0274        | 1.23E-02        | 0.14             |
| rs819750    | 1   | 99469651          | LPPR4               | G/T                    | 0.12                  | ABI Discovery              | 41534        | -0.0065        | 0.0014        | 2.79E-06        | 0.5              |
|             |     |                   |                     |                        |                       | ABI Replication            | 16660        | 0.0022         | 0.0023        | 3.22E-01        | 0.99             |
|             |     |                   |                     |                        |                       | <b>ABI Combined</b>        | <b>58194</b> | <b>-0.0041</b> | <b>0.0012</b> | <b>5.11E-04</b> | <b>0.36</b>      |
|             |     |                   |                     |                        |                       | PAD Discovery              | 39825        | 0.0766         | 0.0407        | 5.97E-02        | 0.04             |
| rs4659996   | 1   | 238912747         | GREM2               | A/G                    | 0.48                  | ABI Discovery              | 33160        | -0.005         | 0.0011        | 3.48E-06        | 0.34             |
|             |     |                   |                     |                        |                       | ABI Replication            | 16658        | -0.0018        | 0.0016        | 2.67E-01        | 0.65             |
|             |     |                   |                     |                        |                       | <b>ABI Combined</b>        | <b>49818</b> | <b>-0.004</b>  | <b>0.0009</b> | <b>7.27E-06</b> | <b>0.4</b>       |
|             |     |                   |                     |                        |                       | PAD Discovery              | 32619        | 0.0467         | 0.0295        | 1.14E-01        | 0.33             |
| rs11580768* | 1   | 2789340           | ACTRT2              | C/T                    | 0.53                  | <b>ABI Discovery</b>       | <b>34252</b> | <b>-0.0053</b> | <b>0.0012</b> | <b>3.85E-06</b> | <b>0.99</b>      |
|             |     |                   |                     |                        |                       | PAD Discovery              | 33735        | 0.0832         | 0.0314        | 0.008095        | 0.4367           |
| rs4366776*  | 17  | 216763            | RPH3AL <sup>‡</sup> | C/T                    | 0.51                  | <b>ABI Discovery</b>       | <b>37127</b> | <b>-0.0047</b> | <b>0.001</b>  | <b>4.52E-06</b> | <b>0.78</b>      |
|             |     |                   |                     |                        |                       | PAD Discovery              | 35398        | 0.061          | 0.0304        | 0.04508         | 0.4154           |
| rs10509665* | 10  | 95518432          | LGI1 <sup>‡</sup>   | A/G                    | 0.61                  | <b>ABI Discovery</b>       | <b>41665</b> | <b>-0.0042</b> | <b>0.0009</b> | <b>5.99E-06</b> | <b>0.33</b>      |
|             |     |                   |                     |                        |                       | PAD Discovery              | 39958        | 0.0454         | 0.0281        | 0.1058          | 0.1607           |
| rs10507044* | 12  | 93774126          | NDUFA12             | T/C                    | 0.41                  | <b>ABI Discovery</b>       | <b>41596</b> | <b>-0.0041</b> | <b>0.0009</b> | <b>7.25E-06</b> | <b>0.91</b>      |
|             |     |                   |                     |                        |                       | PAD Discovery              | 39910        | 0.0386         | 0.0277        | 0.1629          | 0.3781           |

P<sub>het</sub> = p value for heterogeneity

\* Not chosen for replication

<sup>‡</sup> SNP is located within the gene; rs819750 and rs4366776 are within 60kb of the gene <sup>†</sup>PAD defined as ABI<sub>≤</sub>0.9 vs ABI<sub>></sub>0.9

**Supplementary Table 8. Meta-analysis results: SNP associations for PAD (ABI ≤0.9 vs ABI >0.9) with  $p < 10^{-5}$  with population isolates† included.**

| SNP        | Chr | Physical Position | Closest Gene   | Risk / Non-risk Allele | Risk Allele frequency | N     | OR   | 95% Confidence Interval | P value  | P <sub>het</sub> |
|------------|-----|-------------------|----------------|------------------------|-----------------------|-------|------|-------------------------|----------|------------------|
| rs9998941  | 4   | 162544312         | <i>FSTL5*</i>  | A/G                    | 0.22                  | 39715 | 1.18 | (1.11, 1.27)            | 6.00E-07 | 0.49             |
| rs11751656 | 6   | 42751046          | <i>UBR2*</i>   | G/A                    | 0.07                  | 29586 | 1.61 | (1.33, 1.97)            | 1.72E-06 | 0.81             |
| rs12772949 | 10  | 82698704          | <i>SH2D4B</i>  | G/A                    | 0.17                  | 38786 | 1.21 | (1.12, 1.31)            | 2.14E-06 | 0.94             |
| rs6426183  | 1   | 245079347         | <i>AHCTF1*</i> | C/T                    | 0.09                  | 39959 | 1.24 | (1.13, 1.36)            | 4.60E-06 | 0.54             |
| rs11715199 | 3   | 178757173         | <i>TBL1XR1</i> | G/C                    | 0.28                  | 39960 | 1.15 | (1.08, 1.22)            | 4.89E-06 | 0.43             |
| rs7696128  | 4   | 18697484          | <i>LCORL</i>   | G/T                    | 0.52                  | 39960 | 1.13 | (1.07, 1.20)            | 5.02E-06 | 0.88             |
| rs3119311  | 6   | 160613097         | <i>SLC22A2</i> | C/T                    | 0.12                  | 39958 | 1.2  | (1.11, 1.30)            | 5.54E-06 | 0.47             |

P<sub>het</sub> = p value for heterogeneity

\* SNP is located within the gene

† The Amish Study did not participate in the meta-analysis

Supplementary Table 9. SNP associations for both ABI and PAD (ABI<0.9) with  $p < 10^{-4}$ , excluding population isolates.

| SNP        | Chr | Closest Gene     | Risk Allele | Non-risk Allele | Risk Alle Frequency | Ankle-brachial index (ABI) |          |       | Peripheral arterial disease (PAD) |          |       |
|------------|-----|------------------|-------------|-----------------|---------------------|----------------------------|----------|-------|-----------------------------------|----------|-------|
|            |     |                  |             |                 |                     | Beta                       | P value  | N     | Beta                              | P value  | N     |
| rs615552   | 9   | <i>CDKN2B</i>    | t           | c               | 0.5665              | -0.0053                    | 1.52E-07 | 35397 | 0.1176                            | 8.69E-05 | 34903 |
| rs523096   | 9   | <i>CDKN2B</i>    | a           | g               | 0.5615              | -0.0052                    | 3.36E-07 | 35401 | 0.1165                            | 9.99E-05 | 34915 |
| rs518394   | 9   | <i>CDKN2B</i>    | g           | c               | 0.5989              | -0.0047                    | 9.38E-06 | 35252 | 0.1256                            | 8.60E-05 | 34904 |
| rs7100623  | 10  | <i>IDE</i> *     | t           | c               | 0.1992              | -0.0054                    | 1.89E-05 | 35412 | 0.1394                            | 8.39E-05 | 34914 |
| rs7908111  | 10  | <i>IDE</i> *     | a           | g               | 0.2011              | -0.0052                    | 3.22E-05 | 35377 | 0.1384                            | 7.90E-05 | 34879 |
| rs13290547 | 9   | <i>DAB2IP</i> *  | t           | c               | 0.0625              | -0.0093                    | 3.62E-05 | 32135 | 0.2797                            | 2.20E-05 | 31720 |
| rs7898493  | 10  | <i>IDE</i> *     | c           | g               | 0.2032              | -0.0051                    | 3.67E-05 | 35346 | 0.1414                            | 5.78E-05 | 34852 |
| rs11187074 | 10  | <i>IDE</i> *     | c           | g               | 0.2001              | -0.0058                    | 5.64E-05 | 27783 | 0.1380                            | 8.77E-05 | 34915 |
| rs1855916  | 10  | <i>IDE</i> *     | a           | g               | 0.2022              | -0.0050                    | 5.87E-05 | 35320 | 0.1491                            | 2.60E-05 | 34828 |
| rs7084090  | 10  | <i>IDE</i> *     | a           | t               | 0.2022              | -0.0050                    | 5.93E-05 | 35321 | 0.1490                            | 2.62E-05 | 34829 |
| rs6438172  | 3   | <i>GRAMD1C</i> * | a           | g               | 0.2165              | -0.0048                    | 6.56E-05 | 35413 | 0.1359                            | 8.69E-05 | 34915 |
| rs2245830  | 3   | <i>GRAMD1C</i> * | g           | t               | 0.2163              | -0.0048                    | 6.62E-05 | 35400 | 0.1364                            | 8.83E-05 | 34902 |
| rs4682143  | 3   | <i>GRAMD1C</i> * | t           | g               | 0.2162              | -0.0048                    | 6.64E-05 | 35402 | 0.1360                            | 8.78E-05 | 34904 |
| rs7093418  | 10  | <i>IDE</i> *     | t           | g               | 0.2023              | -0.0050                    | 6.69E-05 | 35320 | 0.1497                            | 2.43E-05 | 34828 |
| rs2566973  | 3   | <i>GRAMD1C</i> * | t           | c               | 0.2161              | -0.0048                    | 6.99E-05 | 35400 | 0.1368                            | 8.10E-05 | 34904 |
| rs2566977  | 3   | <i>GRAMD1C</i> * | c           | a               | 0.2158              | -0.0048                    | 9.04E-05 | 35398 | 0.1366                            | 9.90E-05 | 34901 |
| rs1887922  | 10  | <i>IDE</i> *     | c           | t               | 0.2005              | -0.0049                    | 9.74E-05 | 35320 | 0.1467                            | 4.27E-05 | 34827 |

SNPs ordered by strength of the ABI association p value

\* SNP is located within the gene

**Supplementary Table 10: Literature-reported candidate genes for ankle-brachial-index (ABI) and/or peripheral arterial disease (PAD) and their association with ABI in the CHARGE GWAS discovery sample (population isolates excluded).** The table reports the most strongly associated SNP (according to p-value) within the gene region  $\pm 100$  kb upstream and downstream of the candidate gene. We selected a candidate gene only if an association study with at least 100 cases and 100 controls was available independent whether the study was positive or negative. This decision was made on the basis that most of the negative studies were largely underpowered to exclude an association.

| Candidate gene   | Investigated markers as reported  | Ref.                  | Chr. | Coding strand | Gene region |            | Nearest gene | Ref./ coded allele | Coded allele freq. | Effect | P-value | # of loci (eff. loci)* | corr. P-value** | False discovery rate† |          |
|------------------|-----------------------------------|-----------------------|------|---------------|-------------|------------|--------------|--------------------|--------------------|--------|---------|------------------------|-----------------|-----------------------|----------|
|                  |                                   |                       |      |               | 5' start    | Top hit    |              |                    |                    |        |         |                        |                 |                       |          |
|                  |                                   |                       |      |               | 3' end      | rs number  |              |                    |                    |        |         |                        |                 |                       |          |
| ACE              | rs4340 (I/D),<br>rs4291           | <sup>(40-45)</sup>    | 17   | (+)           | 58,808,166  | rs4459609  | 58,902,680   | ACE                | C/A                | 0.650  | -0.002  | 0.0907                 | 87 (31)         | 1.0000                | 1.0000   |
| ADD1             | G460W                             | <sup>(46)</sup>       | 4    | (+)           | 2,715,382   | rs11947904 | 2,774,570    | SH3BP2             | G/T                | 0.052  | 0.007   | 0.0150                 | 183 (63)        | 0.9463                | 1.0000   |
| ADRB2            | Two polymorphisms                 | <sup>(47)</sup>       | 5    | (+)           | 148,086,349 | rs1432628  | 148,231,861  | ADRB2              | C/T                | 0.054  | -0.007  | 0.0012                 | 249 (70)        | 0.0860                | 0.4298   |
| AGT              | G-6A, T174M,<br>M235T, rs699      | <sup>(41,42,44)</sup> | 1    | (-)           | 228,804,892 | rs4847000  | 228,848,364  | COG2               | G/A                | 0.219  | 0.003   | 0.0369                 | 373 (109)       | 1.0000                | 1.0000   |
| AGTR1            | 573C/T (exon<br>5), rs5186        | <sup>(41,44)</sup>    | 3    | (+)           | 149,798,348 | rs1492094  | 150,028,691  | CPB1               | G/A                | 0.392  | 0.003   | 0.0151                 | 334 (88)        | 1.0000                | 1.0000   |
| BRAP             | rs11066001                        | <sup>(48)</sup>       | 12   | (-)           | 110,466,279 | rs2051792  | 110,596,100  | BRAP               | C/T                | 0.024  | 0.008   | 0.0399                 | 55 (18)         | 0.7173                | 1.0000   |
| CDKN2B           | rs1333049                         | <sup>(49)</sup>       | 9    |               | 22,015,503  | rs10757269 | 22,062,264   | CDKN2B             | G/A                | 0.506  | 0.006   | 2.5E-08                | 213 (69)        | 1.7E-06               | 9.32e-05 |
| Chr 11 region*** | rs9665943,<br>rs1042602           | <sup>(50)</sup>       | 11   |               | 82,027,366  | rs4144290  | 84,208,186   | DLG2               | G/A                | 0.126  | -0.005  | 0.0058                 | 7014 (1577)     | 1.0000                | 1.0000   |
| CHRNA3           | rs1051730                         | <sup>(51,52)</sup>    | 15   | (-)           | 76,574,707  | rs1878399  | 76,699,058   | CHRNA3             | G/C                | 0.575  | -0.003  | 0.0047                 | 191 (40)        | 0.1869                | 0.5943   |
| CRP              | 1059 G/C                          | <sup>(53)</sup>       | 1    | (-)           | 157,848,704 | rs2808627  | 157,935,964  | CRP                | T/A                | 0.237  | 0.003   | 0.0197                 | 221 (74)        | 1.0000                | 1.0000   |
| GJA4 (CX37)      | 1019C>T<br>Pro319Ser<br>rs1764391 | <sup>(54,55)</sup>    | 1    | (+)           | 34,931,186  | rs12127690 | 35,077,856   | C1orf212           | G/C                | 0.689  | 0.003   | 0.0229                 | 124 (40)        | 0.9176                | 1.0000   |
| CX3CR1           | V249I, T280M                      | <sup>(56)</sup>       | 3    | (-)           | 39,179,990  | rs2669845  | 39,296,222   | CX3CR1             | C/T                | 0.133  | -0.004  | 0.0073                 | 192 (65)        | 0.4767                | 1.0000   |

to be continued

**Supplementary Table 10:** continued

| Candidate gene        | Investigated markers as reported       | Ref.                       | Chr. | Coding strand | Gene region        |                      | Most strongly associated SNP within the gene region<br>± 100 kb upstream and downstream of the candidate gene |              |                          |                          |        |         |                           |                    | False discovery rate‡ |
|-----------------------|----------------------------------------|----------------------------|------|---------------|--------------------|----------------------|---------------------------------------------------------------------------------------------------------------|--------------|--------------------------|--------------------------|--------|---------|---------------------------|--------------------|-----------------------|
|                       |                                        |                            |      |               | 5' start<br>3' end | Top hit<br>rs number | Position (bp)                                                                                                 | Nearest gene | Ref./<br>coded<br>allele | Coded<br>allele<br>freq. | Effect | P-value | # of loci (eff.<br>loci)* | corr.<br>P-value** |                       |
| CYBA (p22<br>phox)    | C242T                                  | <sup>(57)</sup>            | 16   | (-)           | 87,137,199         | rs3794624            | 87,244,575                                                                                                    | CYBA         | G/A                      | 0.340                    | 0.005  | 6.3E-05 | 138 (58)                  | 0.0036             | 0.0665                |
| CYP2C9                | rs1799853,<br>rs1057910                | <sup>(58)</sup>            | 10   | (+)           | 96,588,430         | rs9332235            | 96,737,895                                                                                                    | CYP2C9       | G/A                      | 0.025                    | -0.011 | 0.0043  | 204 (44)                  | 0.1887             | 0.5943                |
| DAB2IP                | rs7025486                              | <sup>(59)</sup>            | 9    | (+)           | 123,269,220        | rs13290547           | 123,527,316                                                                                                   | DAB2IP       | C/T                      | 0.063                    | -0.009 | 3.6E-05 | 363 (97)                  | 0.0035             | 0.0665                |
| ENPP1                 | K121Q                                  | <sup>(60)</sup>            | 6    | (+)           | 132,070,853        | rs11154647           | 132,254,445                                                                                                   | ENPP1        | G/T                      | 0.052                    | -0.007 | 0.0034  | 324 (86)                  | 0.2897             | 0.7598                |
| SELE (E-<br>selectin) | S128R                                  | <sup>(53,61)</sup>         | 1    | (-)           | 167,858,406        | rs7531806            | 167,917,668                                                                                                   | SELL         | G/A                      | 0.561                    | -0.003 | 0.0045  | 348 (65)                  | 0.2901             | 0.7598                |
| F13A1                 | V34L                                   | <sup>(62)</sup>            | 6    | (-)           | 5,989,310          | rs11756027           | 6,077,751                                                                                                     | F13A1        | C/T                      | 0.756                    | 0.003  | 0.0109  | 638 (211)                 | 1.0000             | 1.0000                |
| F2                    | Prothrombin<br>G20210A                 | <sup>(63-66)</sup>         | 11   | (+)           | 46,597,331         | rs7109698            | 46,629,920                                                                                                    | KIAA0652     | C/T                      | 0.170                    | -0.004 | 0.0009  | 83 (17)                   | 0.0155             | 0.2132                |
| F5                    | G1691A<br>(Leiden)                     | <sup>(63-66)</sup>         | 1    | (-)           | 167,647,816        | rs2040444            | 167,749,060                                                                                                   | F5           | G/A                      | 0.525                    | 0.003  | 0.0024  | 441 (105)                 | 0.2534             | 0.7334                |
| F7                    | AA I/D at<br>11293, R353q              | <sup>(67-69)</sup>         | 13   | (+)           | 112,708,106        | rs2993312            | 112,731,466                                                                                                   | MCF2L        | G/A                      | 0.645                    | -0.003 | 0.0106  | 179 (71)                  | 0.7491             | 1.0000                |
| FGB (FBG)             | Bcl I digestion;<br>T1689G; G-<br>455A | <sup>(67,69-<br/>72)</sup> | 4    | (+)           | 155,603,596        | rs6054               | 155,709,058                                                                                                   | FGB          | C/T                      | 0.006                    | -0.048 | 0.0007  | 174 (57)                  | 0.0384             | 0.2740                |
| FGG                   | 10034C>T,<br>rs2066865                 | <sup>(73)</sup>            | 4    | (-)           | 155,644,737        | rs6054               | 155,709,058                                                                                                   | FGB          | C/T                      | 0.006                    | -0.048 | 0.0007  | 163 (55)                  | 0.0371             | 0.2740                |
| F12 (FXII)            | rs17876008<br>(4C>T)                   | <sup>(74)</sup>            | 5    | (-)           | 176,661,747        | rs335467             | 176,823,248                                                                                                   | DBN1         | G/A                      | 0.457                    | 0.003  | 0.0455  | 65 (24)                   | 1.0000             | 1.0000                |
| GNB3                  | 825C>T                                 | <sup>(46)</sup>            | 12   | (+)           | 6,719,636          | rs729751             | 6,924,611                                                                                                     | C12orf57     | C/T                      | 0.039                    | -0.010 | 0.0034  | 137 (57)                  | 0.1945             | 0.5943                |
| GSTM1                 |                                        | <sup>(75)</sup>            | 1    | (+)           | 109,931,965        | rs655315             | 110,016,701                                                                                                   | GSTM2        | G/A                      | 0.497                    | 0.005  | 0.0004  | 163 (63)                  | 0.0277             | 0.2740                |
| GSTT1                 |                                        | <sup>(75)</sup>            | 22   | (-)           | 22,606,141         | rs9624387            | 22,750,128                                                                                                    | CABIN1       | C/T                      | 0.075                    | -0.004 | 0.0269  | 64 (24)                   | 0.6444             | 1.0000                |

to be continued

**Supplementary Table 10:** continued

| Candidate gene   | Investigated markers as reported    | Ref.                  | Chr. | Coding strand | Gene region |            | Most strongly associated SNP within the gene region ± 100 kb upstream and downstream of the candidate gene |              |                    |                    |        |         |                        |                 |                       |
|------------------|-------------------------------------|-----------------------|------|---------------|-------------|------------|------------------------------------------------------------------------------------------------------------|--------------|--------------------|--------------------|--------|---------|------------------------|-----------------|-----------------------|
|                  |                                     |                       |      |               | 5' start    | Top hit    | Position (bp)                                                                                              | Nearest gene | Ref./ coded allele | Coded allele freq. | Effect | P-value | # of loci (eff. loci)* | corr. P-value** | False discovery rate‡ |
| HFE              | C282Y, H63D                         | <sup>(76)</sup>       | 6    | (+)           | 26,095,488  | rs11751812 | 26,295,313                                                                                                 | HIST1H4D     | G/T                | 0.095              | 0.004  | 0.0177  | 183 (48)               | 0.8472          | 1.0000                |
| HIF1A            | P582S, rs11549465 A588T, rs11549467 | <sup>(77)</sup>       | 14   | (+)           | 61,131,992  | rs17098997 | 61,384,729                                                                                                 | HIF1A        | G/C                | 0.192              | 0.004  | 0.0010  | 206 (51)               | 0.0509          | 0.3113                |
| HP (haptoglobin) | Hp1, Hp2                            | <sup>(78)</sup>       | 16   | (+)           | 70,546,009  | rs16973520 | 70,752,458                                                                                                 | KIAA0174     | G/T                | 0.748              | 0.004  | 0.0007  | 204 (54)               | 0.0399          | 0.2740                |
| ICAM1            | K469E                               | <sup>(52,53,61)</sup> | 19   | (+)           | 10,142,779  | rs281419   | 10,358,291                                                                                                 | GLP-1        | G/A                | 0.149              | -0.003 | 0.1610  | 113 (43)               | 1.0000          | 1.0000                |
| IL1B             | +3953                               | <sup>(79)</sup>       | 2    | (-)           | 113,203,808 | rs12472089 | 113,410,827                                                                                                | IL1F7        | C/T                | 0.326              | 0.003  | 0.0168  | 192 (34)               | 0.5705          | 1.0000                |
| IL6              | -174 G/C                            | <sup>(52,53,80)</sup> | 7    | (+)           | 22,633,345  | rs7796691  | 22,838,141                                                                                                 | IL6          | C/T                | 0.797              | -0.003 | 0.0089  | 261 (73)               | 0.6516          | 1.0000                |
| ITGB3            | PLA1/A2; P1 <sup>A</sup>            | <sup>(71,81)</sup>    | 17   | (+)           | 42,586,207  | rs11871477 | 42,845,075                                                                                                 | C17orf57     | G/A                | 0.985              | 0.012  | 0.0173  | 206 (53)               | 0.9164          | 1.0000                |
| LIPC             | rs2070895 (G-250A)                  | <sup>(82)</sup>       | 15   | (+)           | 56,411,467  | rs261292   | 56,748,364                                                                                                 | LIPC         | G/A                | 0.004              | 0.047  | 0.0027  | 500 (178)              | 0.4758          | 1.0000                |
| LPA              | K-IV repeats; rs1853021 (C93T)      | <sup>(83,84)</sup>    | 6    | (-)           | 160,772,506 | rs10455872 | 161,107,397                                                                                                | LPA          | G/A                | 0.936              | 0.007  | 0.0062  | 268 (74)               | 0.4615          | 1.0000                |
| CCL2 (MCP1)      | -2518 A/G                           | <sup>(53)</sup>       | 17   | (+)           | 29,506,409  | rs2368697  | 29,708,331                                                                                                 | ACCN1        | G/A                | 0.257              | -0.002 | 0.0447  | 236 (64)               | 1.0000          | 1.0000                |
| MIF              | -173 G/C                            | <sup>(53)</sup>       | 22   | (+)           | 22,466,565  | rs17004046 | 22,667,409                                                                                                 | MIF          | G/T                | 0.145              | -0.003 | 0.0580  | 211 (57)               | 1.0000          | 1.0000                |
| MMP1             | -1607 1G/2G                         | <sup>(53)</sup>       | 11   | (-)           | 102,065,861 | rs11225443 | 102,274,104                                                                                                | MMP12        | C/T                | 0.033              | -0.011 | 0.0081  | 329 (90)               | 0.7254          | 1.0000                |
| MMP3             | -1171 5A/6A                         | <sup>(53)</sup>       | 11   | (-)           | 102,111,738 | rs11225443 | 102,319,552                                                                                                | MMP12        | C/T                | 0.033              | -0.011 | 0.0081  | 257 (79)               | 0.6367          | 1.0000                |
| MMP9             | -1563 C/T                           | <sup>(53)</sup>       | 20   | (+)           | 43,970,954  | rs11698938 | 44,178,606                                                                                                 | CD40         | C/T                | 0.010              | -0.026 | 0.0026  | 174 (53)               | 0.1389          | 0.5877                |

to be continued



**Supplementary Table 10:** continued

| Candidate gene     | Investigated markers as reported                            | Ref.                  | Chr. | Coding strand | Gene region                |                      | Most strongly associated SNP within the gene region<br>± 100 kb upstream and downstream of the candidate gene |              |                       |                       |        |         |           | # of loci (eff. loci)* | corr. P-value** | False discovery rate‡ |
|--------------------|-------------------------------------------------------------|-----------------------|------|---------------|----------------------------|----------------------|---------------------------------------------------------------------------------------------------------------|--------------|-----------------------|-----------------------|--------|---------|-----------|------------------------|-----------------|-----------------------|
|                    |                                                             |                       |      |               | 5' start<br>3' end         | Top hit<br>rs number | Position (bp)                                                                                                 | Nearest gene | Ref./<br>coded allele | Coded allele<br>freq. | Effect | P-value |           |                        |                 |                       |
| MTHFR              | C677T                                                       | <sup>(65,66,85)</sup> | 1    | (-)           | 11,668,374<br>11,888,702   | rs2050265            | 11,802,286                                                                                                    | CLCN6        | G/A                   | 0.840                 | 0.003  | 0.0286  | 221 (62)  | 1.0000                 | 1.0000          |                       |
| MTTP<br>(MTP)      | -493G>T                                                     | <sup>(86)</sup>       | 4    | (+)           | 100,615,004<br>100,863,649 | rs11730739           | 100,859,020                                                                                                   | MTTP         | C/T                   | 0.291                 | -0.003 | 0.0163  | 216 (46)  | 0.7480                 | 1.0000          |                       |
| NOS3               | 14 SNPs;<br>-786T>C, -<br>894G>T, 4a/4b                     | <sup>(43,87)</sup>    | 7    | (+)           | 150,219,080<br>150,442,608 | rs11763819           | 150,247,598                                                                                                   | KCNH2        | T/A                   | 0.975                 | -0.010 | 0.0175  | 127 (47)  | 0.8239                 | 1.0000          |                       |
| P2RY12             | H2 haplotype                                                | <sup>(88)</sup>       | 3    | (-)           | 152,438,066<br>152,685,234 | rs3821665            | 152,616,506                                                                                                   | MED12L       | G/A                   | 0.514                 | 0.003  | 0.0391  | 294 (60)  | 1.0000                 | 1.0000          |                       |
| PLA2G7<br>(PAF-AH) | G994T in exon<br>9                                          | <sup>(89)</sup>       | 6    | (-)           | 46,680,238<br>46,911,055   | rs1833460            | 46,885,336                                                                                                    | MEP1A        | C/T                   | 0.112                 | 0.006  | 0.0037  | 205 (47)  | 0.1719                 | 0.5943          |                       |
| SERPINE1<br>(PAI1) | HindIII                                                     | <sup>(67)</sup>       | 7    | (+)           | 100,457,172<br>100,669,026 | rs4727479            | 100,552,387                                                                                                   | SERPINE1     | G/C                   | 0.130                 | -0.005 | 0.0039  | 131 (47)  | 0.1851                 | 0.5943          |                       |
| PPARG              | rs1801282<br>(Pro12Ala)                                     | <sup>(90)</sup>       | 3    | (+)           | 12,204,349<br>12,550,854   | rs310766             | 12,208,482                                                                                                    | SYN2         | G/A                   | 0.254                 | -0.002 | 0.0515  | 314 (82)  | 1.0000                 | 1.0000          |                       |
| SCARB1             | rs4238001,<br>intron 5 (C>T at<br>intron pos.55),<br>rs5888 | <sup>(91)</sup>       | 12   | (-)           | 123,728,129<br>124,014,287 | rs11057830           | 123,873,006                                                                                                   | SCARB1       | G/A                   | 0.154                 | -0.004 | 0.0069  | 265 (99)  | 0.6828                 | 1.0000          |                       |
| SLC2A10            | 10 SNPs                                                     | <sup>(92)</sup>       | 20   | (+)           | 44,671,686<br>44,898,390   | rs11550540           | 44,749,176                                                                                                    | TP53RK       | C/T                   | 0.898                 | 0.005  | 0.0081  | 230 (77)  | 0.6208                 | 1.0000          |                       |
| SRD5A1             | Hinfl SNP                                                   | <sup>(93)</sup>       | 5    | (+)           | 6,586,500<br>6,822,673     | rs12522035           | 6,819,185                                                                                                     | POLS         | C/A                   | 0.926                 | -0.004 | 0.0318  | 346 (101) | 1.0000                 | 1.0000          |                       |
| SRD5A2             | (V89L)                                                      | <sup>(93)</sup>       | 2    | (-)           | 31,503,160<br>31,759,544   | rs7424544            | 31,625,875                                                                                                    | SRD5A2       | C/T                   | 0.977                 | -0.007 | 0.0441  | 127 (25)  | 1.0000                 | 1.0000          |                       |
| UGT1A1             | -53 TA-repeat                                               | <sup>(33)</sup>       | 2    | (+)           | 234,233,658<br>234,446,684 | rs11690786           | 234,357,356                                                                                                   | UGT1A1       | C/T                   | 0.315                 | 0.003  | 0.0036  | 597 (137) | 0.4924                 | 1.0000          |                       |
| VKORC1             |                                                             | <sup>(94)</sup>       | 16   | (-)           | 30,909,677<br>31,113,777   | rs17708638           | 31,078,675                                                                                                    | PRSS36       | C/T                   | 0.310                 | 0.003  | 0.0061  | 54 (12)   | 0.0736                 | 0.4048          |                       |
| ZNF202             | rs10893081 (-<br>660A>G)                                    | <sup>(95)</sup>       | 11   | (-)           | 123,000,207<br>123,217,573 | rs1148107            | 123,020,997                                                                                                   | SCN3B        | C/A                   | 0.969                 | 0.011  | 0.0015  | 308 (70)  | 0.1064                 | 0.4877          |                       |

to be continued

PubMed search terms "((ankle-brachial index) OR (peripheral arterial disease)) AND polymorphism"

For all candidate genes the official HGNC-approved gene names are reported and, where needed, the alias names used in the publications are provided in brackets. The chromosomal coordinates refer to the plus-strand according to HapMap Rel 24 (based on NCBI Genome Build 36 and dbSNP b.126). In the case that more than one RefSeq transcript is known, the +/- 100 kb gene region was defined starting from the coordinates which comprised all known transcripts (i.e. starting from the beginning of the outmost 5' exon to the end of the outmost 3' exon). The strand actually encoding the candidate gene is reported in the column "coding strand".

\* Effective number of independent loci calculated using the function reported by Gao <sup>(38)</sup> based on imputed genotype data in KORA F4

\*\* P-value Bonferroni corrected within each gene region using the effective number of loci

\*\*\* Chromosome 11 region: Chromosomal region identified by admixture mapping

‡ Using the corrected p-values of the SNP in association to ABI, we calculated a false discovery rate (FDR) to account for the number of gene regions examined. An FDR <0.10 defined evidence of a significant association.

**Supplementary Table 11: Candidate SNPs for myocardial infarction and /or coronary artery disease and their association with ABI in the CHARGE GWAS discovery sample (population isolates excluded) <sup>†</sup>.**

| SNP        | Chr | Physical Position | Closest Gene                    | Risk / Non-risk Allele | Risk Allele frequency | N     | Beta    | SE    | P value  | False discovery rate‡ |
|------------|-----|-------------------|---------------------------------|------------------------|-----------------------|-------|---------|-------|----------|-----------------------|
| rs4977574  | 9   | 22,088,574        | <i>CDKN2A, CKDN2B</i>           | G/A                    | 0.49                  | 35411 | -0.0047 | 0.001 | 2.33E-06 | 6.52E-05              |
| rs1122608  | 19  | 11,024,601        | <i>LDLR</i>                     | G/T                    | 0.74                  | 35384 | -0.0035 | 0.001 | 2.56E-03 | 0.036                 |
| rs1412444  | 10  | 90,992,907        | <i>LIPA</i>                     | C/T                    | 0.67                  | 26195 | 0.0027  | 0.001 | 3.05E-02 | 0.284                 |
| rs2505083  | 10  | 30,375,128        | <i>KIAA1462</i>                 | C/T                    | 0.42                  | 35411 | 0.0018  | 0.001 | 8.28E-02 | 0.58                  |
| rs46522    | 17  | 44,343,596        | <i>UBE2Z, GIP, ATP5G1, SNF8</i> | T/C                    | 0.54                  | 35364 | -0.0015 | 0.001 | 1.17E-01 | 0.594                 |
| rs12936587 | 17  | 17,484,447        | <i>RASD1, SMCR3, PEMT</i>       | G/A                    | 0.55                  | 35346 | 0.0016  | 0.001 | 1.27E-01 | 0.594                 |
| rs2895811  | 14  | 99,203,695        | <i>HHIPL1</i>                   | C/T                    | 0.42                  | 35396 | 0.0014  | 0.001 | 1.76E-01 | 0.69                  |
| rs964184   | 11  | 116,154,127       | <i>ZNF259, APOA5-A4-C3-A1</i>   | G/C                    | 0.14                  | 35384 | 0.0019  | 0.002 | 1.97E-01 | 0.69                  |
| rs3184504  | 12  | 110,368,991       | <i>SH2B3</i>                    | T/C                    | 0.5                   | 35359 | -0.0011 | 0.001 | 2.70E-01 | 0.762                 |
| rs2306374  | 3   | 139,602,642       | <i>MRAS</i>                     | C/T                    | 0.16                  | 35410 | 0.0015  | 0.001 | 2.81E-01 | 0.762                 |
| rs6903956  | 6   | 11,882,569        | <i>C6orf105</i>                 | G/A                    | 0.63                  | 30183 | 0.0012  | 0.001 | 2.99E-01 | 0.762                 |
| rs12413409 | 10  | 104,709,086       | <i>CYP17A1, CNM2, NT5C2</i>     | G/A                    | 0.91                  | 35413 | 0.0016  | 0.002 | 3.61E-01 | 0.843                 |
| rs10953541 | 7   | 107,031,781       | <i>7q22</i>                     | C/T                    | 0.75                  | 35369 | 0.0009  | 0.001 | 4.52E-01 | 0.886                 |
| rs974819   | 11  | 103,165,777       | <i>PDGFD</i>                    | C/T                    | 0.71                  | 35280 | 0.0007  | 0.001 | 5.05E-01 | 0.886                 |
| rs4773144  | 13  | 109,758,713       | <i>COL4A1, COL4A2</i>           | A/G                    | 0.55                  | 33491 | -0.0007 | 0.001 | 5.06E-01 | 0.886                 |
| rs12190287 | 6   | 134,256,218       | <i>TCF21</i>                    | G/C                    | 0.38                  | 35168 | 0.0007  | 0.001 | 5.32E-01 | 0.886                 |
| rs6725887  | 2   | 203,454,130       | <i>WDR12</i>                    | C/T                    | 0.13                  | 35399 | 0.0009  | 0.002 | 5.54E-01 | 0.886                 |
| rs17114036 | 1   | 56,735,409        | <i>PPAP2B</i>                   | A/G                    | 0.9                   | 35187 | -0.001  | 0.002 | 5.91E-01 | 0.886                 |
| rs9982601  | 21  | 34,520,998        | <i>MRPS6</i>                    | T/C                    | 0.14                  | 35343 | -0.0008 | 0.002 | 6.01E-01 | 0.886                 |
| rs17609940 | 6   | 35,142,778        | <i>ANKS1A</i>                   | G/C                    | 0.8                   | 35382 | 0.0006  | 0.001 | 6.51E-01 | 0.911                 |
| rs216172   | 17  | 2,073,254         | <i>SMG6, SRR</i>                | G/C                    | 0.65                  | 26051 | 0.0004  | 0.001 | 7.42E-01 | 0.927                 |
| rs1746048  | 10  | 44,095,830        | <i>CXCL12</i>                   | T/C                    | 0.13                  | 35403 | -0.0004 | 0.002 | 7.59E-01 | 0.927                 |
| rs3825807  | 15  | 76,876,166        | <i>ADAMTS7</i>                  | G/A                    | 0.44                  | 35338 | 0.0003  | 0.001 | 7.61E-01 | 0.927                 |
| rs579459   | 9   | 135,143,989       | <i>ABO</i>                      | C/T                    | 0.22                  | 35371 | 0.0002  | 0.001 | 8.72E-01 | 0.98                  |
| rs12526453 | 6   | 13,035,530        | <i>PHACTR1</i>                  | C/G                    | 0.65                  | 35353 | -0.0001 | 0.001 | 9.09E-01 | 0.98                  |
| rs11206510 | 1   | 55,268,627        | <i>PCSK9</i>                    | T/C                    | 0.81                  | 35174 | -0.0001 | 0.001 | 9.54E-01 | 0.98                  |
| rs599839   | 1   | 109,623,689       | <i>SORT1</i>                    | G/A                    | 0.23                  | 35379 | 0       | 0.001 | 9.75E-01 | 0.98                  |
| rs11556924 | 7   | 129,450,732       | <i>ZC3HC1</i>                   | C/T                    | 0.61                  | 35217 | 0       | 0.001 | 9.80E-01 | 0.98                  |

<sup>†</sup> Candidate genes for look-up of association with ABI were identified by recent GWAS to be genome-wide significantly associated with CAD.

<sup>‡</sup> Using the p-values of the SNP in association to ABI, we calculated a false discovery rate (FDR) to account for the number of gene regions examined. An FDR <0.10 defined evidence of a significant association.



**Suppl Figure 1: Quantile-quantile plots of the meta-analysis of GWAS of ABI.** The dots represent the observed  $-\log_{10}$  p-values associated with ABI. The expected distribution of  $-\log_{10}$  p-values under the null hypothesis is shown by the straight line. A) excluding the population isolates; B) including the population isolates

**A**

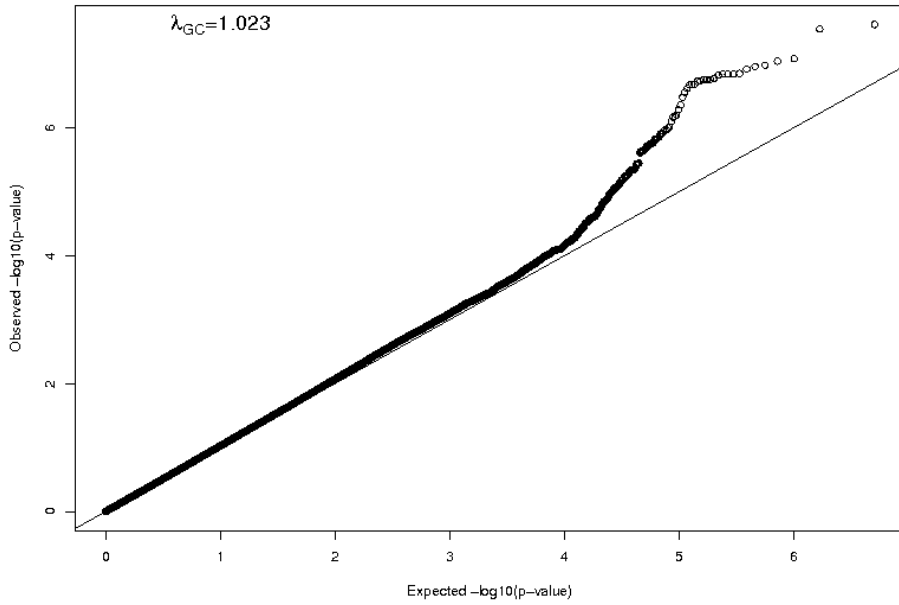

**B**

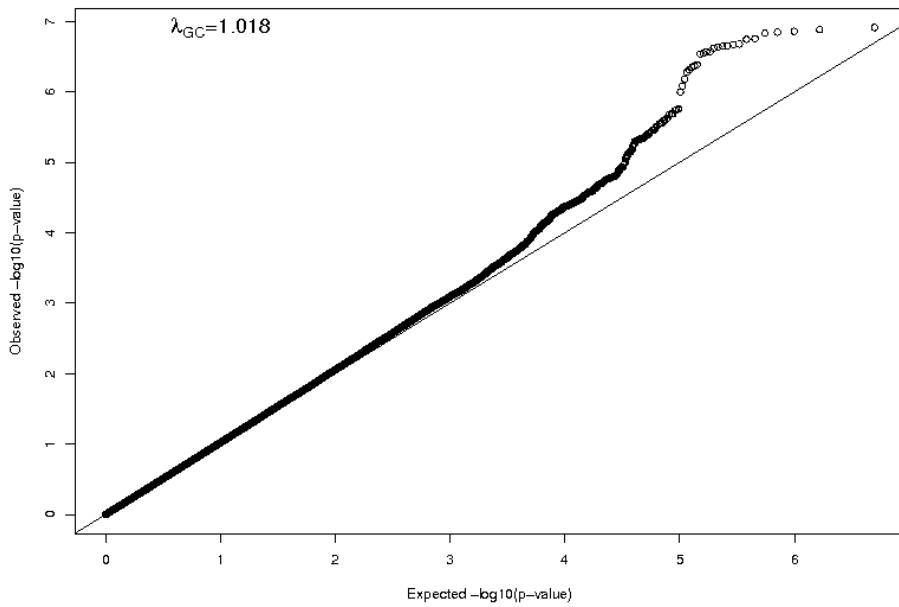

**Suppl Figure 2: Manhattan plots of the meta-analysis of GWAS of ABI.** X-axis represents the chromosomal position for each SNP, and the y-axis the  $-\log_{10}$  p-value for association with ABI. The horizontal dotted line represents the genome-wide significance level of  $P < 5 \times 10^{-8}$ . A) excluding the population isolates; B) including the population isolates

**A**

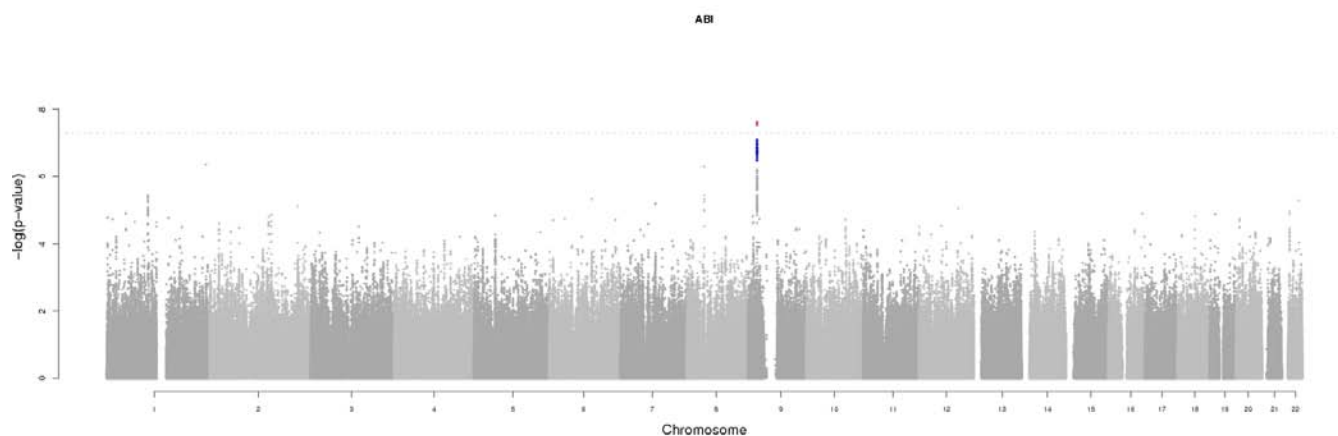

**B**

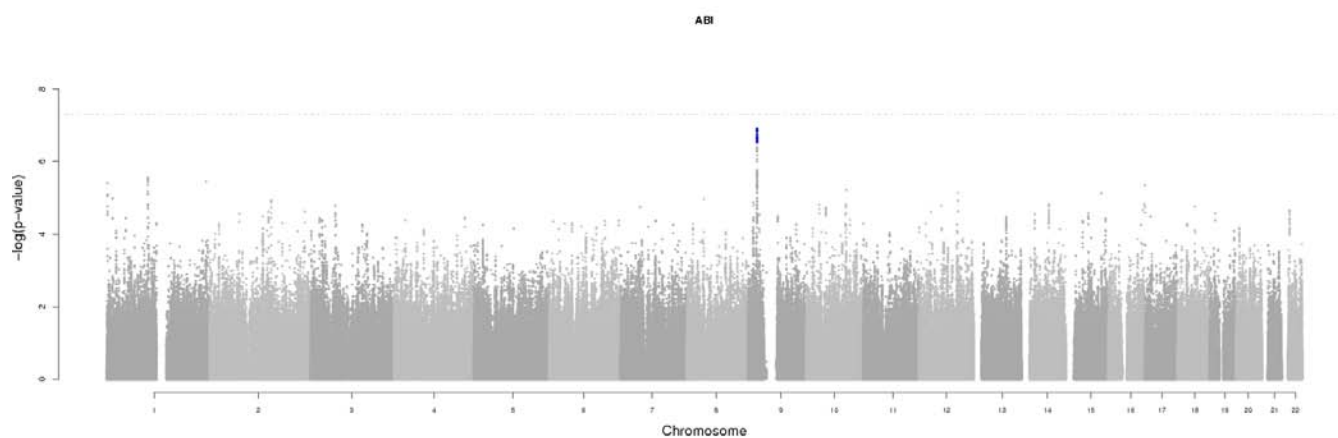

## Acknowledgments/Funding Sources

| Study                                            | Acknowledgements/Funding                                                                                                                                                                                                                                                                                                                                                                                                                                                                                                                                                                                                                                                                                                                                                                                                                                                           |
|--------------------------------------------------|------------------------------------------------------------------------------------------------------------------------------------------------------------------------------------------------------------------------------------------------------------------------------------------------------------------------------------------------------------------------------------------------------------------------------------------------------------------------------------------------------------------------------------------------------------------------------------------------------------------------------------------------------------------------------------------------------------------------------------------------------------------------------------------------------------------------------------------------------------------------------------|
| Amish Study (Amish)                              | This work was supported by research grants R01 088119, R01 AR046838, U01 HL72515, and R01 AG18728. Additional support was provided by the University of Maryland General Clinical Research Center, Grant M01 RR 16500, Mid-Atlantic Nutrition Obesity Research Center Grant P30 DK072488, General Clinical Research Centers Program, National Center for Research Resources (NCRR), NIH, and the Baltimore Veterans Administration Geriatric Research and Education Clinical Center (GRECC). Dr. Montasser was supported by T32 training Grant AG000219. We gratefully acknowledge our Amish liaisons and field workers and the extraordinary cooperation and support of the Amish community without which these studies would not have been possible.                                                                                                                             |
| Atherosclerosis Risk in Communities Study (ARIC) | The Atherosclerosis Risk in Communities Study is carried out as a collaborative study supported by National Heart, Lung, and Blood Institute contracts (HHSN268201100005C, HHSN268201100006C, HHSN268201100007C, HHSN268201100008C, HHSN268201100009C, HHSN268201100010C, HHSN268201100011C, and HHSN268201100012C), R01HL087641, R01HL59367 and R01HL086694; National Human Genome Research Institute contract U01HG004402; and National Institutes of Health contract HHSN268200625226C. The authors thank the staff and participants of the ARIC study for their important contributions. Infrastructure was partly supported by Grant Number UL1RR025005, a component of the National Institutes of Health and NIH Roadmap for Medical Research.                                                                                                                               |
| Cardiovascular Health Study (CHS)                | This CHS research was supported by NHLBI contracts N01-HC-85239, N01-HC-85079 through N01-HC-85086; N01-HC-35129, N01 HC-15103, N01 HC-55222, N01-HC-75150, N01-HC-45133 and NHLBI grants HL080295, HL075366, HL087652, HL105756 with additional contribution from NINDS. Additional support was provided through AG-023629, AG-15928, AG-20098, and AG-027058 from the NIA. See also <a href="http://www.chs-nhlbi.org/pi.htm">http://www.chs-nhlbi.org/pi.htm</a> . DNA handling and genotyping was supported in part by National Center for Research Resources grant M01-RR00425 to the Cedars-Sinai General Clinical Research Center Genotyping core, Cedars-Sinai Board of Governors' Chair in Medical Genetics (JIR), and National Institute of Diabetes and Digestive and Kidney Diseases grant DK063491 to the Southern California Diabetes Endocrinology Research Center. |
| Family Heart Study (FamHS)                       | The Family Heart Study GWAS was funded by grant HL08770002 and the work was supported by contract numbers R01HL08770003 from the NHLBI, and R01DK06833603 and R01DK07568101 from NIDDK.                                                                                                                                                                                                                                                                                                                                                                                                                                                                                                                                                                                                                                                                                            |
| Framingham Heart Study (FHS)                     | This research was conducted in part using data and resources from the Framingham Heart Study of the National Heart Lung and Blood Institute of the National Institutes of Health and Boston University School of Medicine. The analyses reflect intellectual input and resource development from the Framingham Heart Study investigators participating in the SNP Health Association Resource (SHARe) project. This work was partially supported by the National Heart, Lung and Blood Institute's Framingham Heart Study (Contract No. N01-HC-25195) and its contract with Affymetrix, Inc for genotyping services (Contract No. N02-HL-6-4278). A portion of                                                                                                                                                                                                                    |

|                                                                          |                                                                                                                                                                                                                                                                                                                                                                                                                                                                                                                                                                                                                                                                                                                                                                                                                                                                              |
|--------------------------------------------------------------------------|------------------------------------------------------------------------------------------------------------------------------------------------------------------------------------------------------------------------------------------------------------------------------------------------------------------------------------------------------------------------------------------------------------------------------------------------------------------------------------------------------------------------------------------------------------------------------------------------------------------------------------------------------------------------------------------------------------------------------------------------------------------------------------------------------------------------------------------------------------------------------|
|                                                                          | <p>this research utilized the Linux Cluster for Genetic Analysis (LinGA-II) funded by the Robert Dawson Evans Endowment of the Department of Medicine at Boston University School of Medicine and Boston Medical Center. A portion of this research was conducted using the Linux Cluster for Genetic Analysis (LinGA-II) funded by the Robert Dawson Evans Endowment of the Department of Medicine at Boston University School of Medicine and Boston Medical Center.</p>                                                                                                                                                                                                                                                                                                                                                                                                   |
| Genetic Epidemiology Network of Arteriopathy (GENOA)                     | <p>"Genetic Epidemiology Network of Arteriopathy (GENOA) study is supported by the National Institutes of Health, grant number 5R01HL087660 from National Heart, Lung and Blood Institute."</p>                                                                                                                                                                                                                                                                                                                                                                                                                                                                                                                                                                                                                                                                              |
| Gutenberg Heart Study (GHS)                                              | <p>The Gutenberg Heart Study is funded through the government of Rheinland-Pfalz ("Stiftung Rheinland Pfalz für Innovation", contract number AZ 961-386261/733), the research programs "Wissen schafft Zukunft" and "Schwerpunkt Vaskuläre Prävention" of the Johannes Gutenberg-University of Mainz and its contract with Boehringer Ingelheim and PHILIPS Medical Systems including an unrestricted grant for the Gutenberg Heart Study. This research was also supported by the National Genome Network "NGFNplus" (contract number project A3 01GS0833 and 01GS0831) by the Federal Ministry of Education and Research, Germany</p>                                                                                                                                                                                                                                      |
| Health, Aging and Body Composition (Health ABC)                          | <p>This research was supported by NIA contracts N01AG62101, N01AG62103, and N01AG62106. The genome-wide association study was funded by NIA grant 1R01AG032098-01A1 to Wake Forest University Health Sciences and genotyping services were provided by the Center for Inherited Disease Research (CIDR). CIDR is fully funded through a federal contract from the National Institutes of Health to The Johns Hopkins University, contract number HHSN268200782096C.</p>                                                                                                                                                                                                                                                                                                                                                                                                      |
| Invecchiare in Chianti Study (InCHIANTI)                                 | <p>The InCHIANTI study baseline (1998-2000) was supported as a "targeted project" (ICS110.1/RF97.71) by the Italian Ministry of Health and in part by the U.S. National Institute on Aging (Contracts: 263 MD 9164 and 263 MD 821336); the InCHIANTI Follow-up 1 (2001-2003) was funded by the U.S. National Institute on Aging (Contracts: N.1-AG-1-1 and N.1-AG-1-2111); the InCHIANTI Follow-ups 2 and 3 studies (2004-2010) were financed by the U.S. National Institute on Aging (Contract: N01-AG-5-0002); supported in part by the Intramural research program of the National Institute on Aging, National Institutes of Health, Baltimore, Maryland. This research was supported in part by the Intramural Research Program of the National Institute on Aging. A portion of the support was through a R&amp;D contract with MedStar Health Research Institute.</p> |
| Cooperative Health Research in the Region of Augsburg (KORA F3, KORA F4) | <p>This study was partially funded by the "Genomics of Lipid-associated Disorders - GOLD" of the "Austrian Genome Research Programme GEN-AU" and by the Austrian Heart Fund to F. Kronenberg and by the Austrian National Bank (Project-Nr. 13662) to Barbara Kollerits. The MONICA/KORA Augsburg cohort study was financed by the Helmholtz Zentrum München and the German National Genome Research Net NGFN2 and NGFNplus (H.-E. Wichmann 01GS0823).</p>                                                                                                                                                                                                                                                                                                                                                                                                                   |
| Netherlands Study of Anxiety and Depression (NESDA)                      | <p>NESDA was supported by the Geestkracht program of ZonMW [grant 10-000-1002]; matching funds from universities and mental health care institutes involved in NESDA (GGZ Buitenamstel-Geestgronden, Rivierduinen, University Medical Center Groningen, GGZ 25 Lentis, GGZ Friesland, GGZ Drenthe). Genotyping was funded by the Genetic Association Information Network (GAIN) of the Foundation for the US National Institutes of Health, and analysis was supported by grants from GAIN and</p>                                                                                                                                                                                                                                                                                                                                                                           |



|                                     |                                                                                                                                                                                                                                                                                                                                                                                                                                                                                                                                                                                                                                                                                                                                                                                                                                                                                                                                                                                                                                                                                                                                                                                                                                                                                                                                                                                                                                                                                                                                                                 |
|-------------------------------------|-----------------------------------------------------------------------------------------------------------------------------------------------------------------------------------------------------------------------------------------------------------------------------------------------------------------------------------------------------------------------------------------------------------------------------------------------------------------------------------------------------------------------------------------------------------------------------------------------------------------------------------------------------------------------------------------------------------------------------------------------------------------------------------------------------------------------------------------------------------------------------------------------------------------------------------------------------------------------------------------------------------------------------------------------------------------------------------------------------------------------------------------------------------------------------------------------------------------------------------------------------------------------------------------------------------------------------------------------------------------------------------------------------------------------------------------------------------------------------------------------------------------------------------------------------------------|
|                                     | <p>the NIMH (MH081802). Genotype data were obtained from dbGaP (<a href="http://www.ncbi.nlm.nih.gov/dbgap">http://www.ncbi.nlm.nih.gov/dbgap</a>, accession number phs000020.v1.p1). Statistical analyses were carried out on the Genetic Cluster Computer (<a href="http://www.geneticcluster.org">http://www.geneticcluster.org</a>), which is financially supported by the Netherlands Scientific Organization (NWO 480-05-003) along with a supplement from the Dutch Brain Foundation.</p>                                                                                                                                                                                                                                                                                                                                                                                                                                                                                                                                                                                                                                                                                                                                                                                                                                                                                                                                                                                                                                                                |
| Nijmegen Biomedical Study (NBS)     | <p>The Nijmegen Biomedical Study (NBS) was initiated in 2000 as a large study among the inhabitants of the municipality of Nijmegen by the departments of Epidemiology, Biostatistics and HTA, Clinical Chemistry, and Endocrinology of the Radboud University Nijmegen Medical Centre (RUNMC) in collaboration with the municipality of Nijmegen en de community health service of Nijmegen. Support was obtained from RUNMC. The measurements of ABI and other non-invasive measurements of atherosclerosis (NIMA) was supported by Grant 2003B057 of the Netherlands Heart Foundation. This work was sponsored by the Stichting Nationale Computerfaciliteiten (National Computing Facilities Foundation, NCF) for the use of supercomputer facilities, with financial support from the Nederlandse Organisatie voor Wetenschappelijk Onderzoek (Netherlands Organization for Scientific Research, NWO).</p>                                                                                                                                                                                                                                                                                                                                                                                                                                                                                                                                                                                                                                                 |
| Rotterdam Study (RS-I and RS-II)    | <p>The Rotterdam GWA study was funded by the Netherlands Organisation of Scientific Research NWO Investments (nr. 175.010.2005.011, 911-03-012), the Research Institute for Diseases in the Elderly (014-93-015; RIDE2), the Netherlands Genomics Initiative (NGI)/Netherlands Consortium for Healthy Aging (NCHA) project nr. 050-060-810. This study is further supported by NWO grant (vici, 918-76-619). The Rotterdam Study is funded by Erasmus Medical Center and Erasmus University, Rotterdam, Netherlands Organization for the Health Research and Development (ZonMw), the Research Institute for Diseases in the Elderly (RIDE), the Ministry of Education, Culture and Science, the Ministry for Health, Welfare and Sports, the European Commission (DG XII), and the Municipality of Rotterdam. The authors are very grateful to the participants and staff from the Rotterdam Study, the participating general practitioners and the pharmacists. We thank Pascal Arp, Mila Jhamai, Dr Michael Moorhouse, Marijn Verkerk, and Sander Bervoets for their help in creating the GWAS database. We would like to thank Dr. Tobias A. Knoch, Luc V. de Zeeuw, Anis Abuseiris, and Rob de Graaf as well as their institutions the Erasmus Computing Grid, Rotterdam, The Netherlands, and especially the national German MediGRID and Services@MediGRID part of the German D-Grid, both funded by the German Bundesministerium fuer Forschung und Technology under grants #01 AK 803 A-H and # 01 IG 07015 G, for access to their grid resources.</p> |
| Study of Health in Pomerania (SHIP) | <p>SHIP is part of the Community Medicine Research net of the University of Greifswald, Germany, which is funded by the Federal Ministry of Education and Research (grants no. 01ZZ9603, 01ZZ0103, and 01ZZ0403), the Ministry of Cultural Affairs as well as the Social Ministry of the Federal State of Mecklenburg-West Pomerania. Genome-wide data have been supported by the Federal Ministry of Education and Research (grant no. 03ZIK012) and a joint grant from Siemens Healthcare, Erlangen, Germany and the Federal State of Mecklenburg- West Pomerania. The University of Greifswald is a member of the 'Center of Knowledge Interchange' program of the Siemens AG.</p>                                                                                                                                                                                                                                                                                                                                                                                                                                                                                                                                                                                                                                                                                                                                                                                                                                                                           |
| CROATIA Study (Croatia-Vis,         | <p>The CROATIA study would like to acknowledge the invaluable contributions of the recruitment teams (including those from the Institute of Anthropological Research</p>                                                                                                                                                                                                                                                                                                                                                                                                                                                                                                                                                                                                                                                                                                                                                                                                                                                                                                                                                                                                                                                                                                                                                                                                                                                                                                                                                                                        |

|                                                            |                                                                                                                                                                                                                                                                                                                                                                                                                                                                                                                                                                                                                                                                                                                                                                                                   |
|------------------------------------------------------------|---------------------------------------------------------------------------------------------------------------------------------------------------------------------------------------------------------------------------------------------------------------------------------------------------------------------------------------------------------------------------------------------------------------------------------------------------------------------------------------------------------------------------------------------------------------------------------------------------------------------------------------------------------------------------------------------------------------------------------------------------------------------------------------------------|
| Croatia-Korcula, Croatia-Split)                            | in Zagreb) in Vis and Korcula and at the Croatian Centre for Global Health at the University of Split, the administrative teams in Croatia and Edinburgh and the people of Vis, Korcula and Split. Genotyping was performed at the Wellcome Trust Clinical Research Facility in Edinburgh for CROATIA-Vis, by Helmholtz Zentrum München, GmbH, Neuherberg, Germany for CROATIA-Korcula and by AROS Applied Biotechnology, Aarhus, Denmark for CROATIA-Split. These studies were supported by grants from the Medical Research Council UK and Ministry of Science, Education and Sport of the Republic of Croatia (No. 108-1080315-0302) and CROATIA-Vis by the European Union framework program 6 European Special Populations Research Network (EUROSPAN) project (contract LSHG-CT-2006-018947) |
| Erasmus Rucphen Family Study (ERF)                         | The genotyping for the ERF study was supported by EUROSPAN (European Special Populations Research Network) and the European Commission FP6 STRP grant (018947; LSHG-CT-2006-01947). The ERF study was further supported by grants from the Netherlands Organisation for Scientific Research, Erasmus MC, the Centre for Medical Systems Biology (CMSB) and the Netherlands Brain Foundation (HersenStichting Nederland). We are grateful to all patients and their relatives, general practitioners and neurologists for their contributions and to P. Veraart for her help in genealogy, Jeannette Vergeer for the supervision of the laboratory work and P. Snijders for his help in data collection.                                                                                           |
| Orkney Complex Disease Study (Orcades)                     | ORCADES was supported by the Chief Scientist Office of the Scottish Government, the Royal Society and the European Union framework program 6 EUROSPAN project (contract no. LSHG-CT-2006-018947). DNA extractions were performed at the Wellcome Trust Clinical Research Facility in Edinburgh. We would like to acknowledge the invaluable contributions of Lorraine Anderson and the research nurses in Orkney, the administrative team in Edinburgh and the people of Orkney.                                                                                                                                                                                                                                                                                                                  |
| Bruneck Study (Bruneck)                                    | The study was supported by the Pustertaler Verein zur Prävention von Herz- und Hirngefaesserkrankungen, Gesundheitsbezirk Bruneck, and the Assessorat fuer Gesundheit, Province of Bolzano, Italy.                                                                                                                                                                                                                                                                                                                                                                                                                                                                                                                                                                                                |
| Copenhagen City Heart Study (CCHS)                         | This work was supported by a Specific Targeted Research Project grant from the European Union, Sixth Framework Programme Priority (FP-2005-LIFESCIHEALTH-6) contract 037631, the Danish Medical Research Council (Copenhagen), the Research Fund at Rigshospitalet, Copenhagen University Hospital (Copenhagen), Chief Physician Johan Boserup and Lise Boserup's Fund (Copenhagen), Ingeborg and Leo Dannin's Grant (Copenhagen), and Henry Hansen's and Wife's Grant (Copenhagen). Genotyping was supported by a grant from the Austrian Heart Fund to F. Kronenberg.                                                                                                                                                                                                                           |
| National Health and Nutrition Examination Surveys (NHANES) | The study participants derive from the National Health and Nutrition Examination Surveys (NHANES), and these studies are supported by the Centers for Disease Control and Prevention. We would like to thank Dr. Geraldine McQuillan and Jody McLean for their help in accessing the Genetic NHANES data. The findings and conclusions in this report are those of the authors and do not necessarily represent the views of the Centers for Disease Control and Prevention. The Vanderbilt University Center for Human Genetics Research, Computational Genomics Core provided computational and/or analytical support for this work. Genotyping was performed in the Vanderbilt DNA Resources Core by Paxton Baker under the direction of Dr. Holli Dilks and Cara Sutcliffe.                   |
| Multi-Ethnic Study of                                      | MESA and the MESA SHARe project are conducted and supported by the National Heart, Lung, and Blood Institute (NHLBI) in collaboration with MESA investigators.                                                                                                                                                                                                                                                                                                                                                                                                                                                                                                                                                                                                                                    |

|                                                               |                                                                                                                                                                                                                                                                                                                                                |
|---------------------------------------------------------------|------------------------------------------------------------------------------------------------------------------------------------------------------------------------------------------------------------------------------------------------------------------------------------------------------------------------------------------------|
| Atherosclerosis (MESA)                                        | Support is provided by grants and contracts N01 HC-95159, N01-HC-95160, N01-HC-95161, N01-HC-95162, N01-HC-95163, N01-HC-95164, N01-HC-95165, N01-HC-95166, N01-HC-95167, N01-HC-95168, N01-HC-95169 and RR-024156. MESA SNP Health Association Resource (SHARe): "Funding for SHARe genotyping was provided by NHLBI Contract N02-HL-6-4278." |
| Prevention of Renal and Vascular End-stage Disease (PREVEND)  | The PREVEND study is supported by the Dutch Kidney Foundation (Grant E033), EU project grant GENECURE (FP-6 LSHM CT 2006 037697), and NWO VENI (grant number 916.76.170)                                                                                                                                                                       |
| Cardiovascular Disease in Intermittent Claudication (CAVASIC) | This study was partially funded by the "Genomics of Lipid-associated Disorders - GOLD" of the "Austrian Genome Research Programme GEN-AU" and by the Austrian Heart Fund to F. Kronenberg and by the Austrian National Bank (Project-Nr. 13662) to Barbara Kollerits.                                                                          |
| Genetic Determinants of Peripheral Arterial Disease (GenePAD) | This study was supported by grants from the National Heart, Lung and Blood Institute (RO1 HL-75774, 1K12 HL087746, 1P50HL083800) as well as a National Institutes of Health grant M01 RR 00070 (General Clinical Research Center, Stanford University School of Medicine) and the Stanford Cardiovascular Institute.                           |
| Linz Peripheral Arterial Disease (LIPAD)                      | This project was supported in part by a grant for scientific research from the Upper Austrian Government. Genotyping was supported by a grant from the Austrian Heart Fund to F. Kronenberg.                                                                                                                                                   |

## References

1. The Atherosclerosis Risk in Communities (ARIC) Study: design and objectives. The ARIC investigators. *Am. J. Epidemiol.* 129:687-702, 1989.
2. Fried LP, Borhani NO, Enright P, Furberg CD, Gardin JM, Kronmal RA, Kuller LH, Manolio TA, Mittelmark MB, Newman A, .: The Cardiovascular Health Study: design and rationale. *Ann. Epidemiol.* 1:263-276, 1991.
3. Higgins M, Province M, Heiss G, Eckfeldt J, Ellison RC, Folsom AR, Rao DC, Sprafka M, Williams R: NHLBI Family Heart Study: objectives and design. *Am. J. Epidemiol.* 143:1219-1228, 1996.
4. Dawber TR, MEADORS GF, MOORE FE, Jr.: Epidemiological approaches to heart disease: the Framingham Study. *Am. J. Public Health Nations. Health* 41:279-281, 1951.
5. Dawber TR, Kannel WB, LYELL LP: An approach to longitudinal studies in a community: the Framingham Study. *Ann. N. Y. Acad. Sci.* 107:539-556, 1963.
6. Feinleib M, Kannel WB, Garrison RJ, McNamara PM, Castelli WP: The Framingham Offspring Study. Design and preliminary data. *Prev. Med.* 4:518-525, 1975.
7. Kannel WB, Feinleib M, McNamara PM, Garrison RJ, Castelli WP: An investigation of coronary heart disease in families. The Framingham offspring study. *Am. J. Epidemiol.* 110:281-290, 1979.
8. Chobanian AV, Bakris GL, Black HR, Cushman WC, Green LA, Izzo JL, Jr., Jones DW, Materson BJ, Oparil S, Wright JT, Jr., Roccella EJ: The Seventh Report of the Joint National Committee on Prevention, Detection, Evaluation, and Treatment of High Blood Pressure: the JNC 7 report. *JAMA* 289:2560-2572, 2003.
9. Ferrucci L, Bandinelli S, Benvenuti E, Di IA, Macchi C, Harris TB, Guralnik JM: Subsystems contributing to the decline in ability to walk: bridging the gap between epidemiology and geriatric practice in the InCHIANTI study. *J. Am. Geriatr. Soc.* 48:1618-1625, 2000.
10. Wichmann HE, Gieger C, Illig T, for the MONIKA/KORA Study Group: KORA-gen: Resource for Population Genetics, Controls and a Broad Spectrum of Disease Phenotypes. *Gesundheitswesen* 67:S26-S30, 2005.
11. Penninx BW, Beekman AT, Smit JH, et al: The Netherlands Study of Depression and Anxiety (NESDA): rationale, objectives and methods. *Int. J. Methods Psychiatr. Res.* 17:121-140, 2008.
12. Sullivan PF, De Geus EJ, Willemsen G, et al: Genome-wide association for major depressive disorder: a possible role for the presynaptic protein piccolo. *Mol. Psychiatry* 14:359-375, 2009.
13. Hoogendoorn EH, Hermus AR, de VF, Ross HA, Verbeek AL, Kiemeny LA, Swinkels DW, Sweep FC, den HM: Thyroid function and prevalence of anti-thyroperoxidase antibodies in a population with borderline sufficient iodine intake: influences of age and sex. *Clin. Chem.* 52:104-111, 2006.
14. Kiemeny LA, Thorlacius S, Sulem P, et al: Sequence variant on 8q24 confers susceptibility to urinary bladder cancer. *Nat. Genet* 40:1307-1312, 2008.
15. Holewijn S, den HM, Swinkels DW, Stalenhoef AF, De GJ: The metabolic syndrome and its traits as risk factors for subclinical atherosclerosis. *J. Clin. Endocrinol. Metab* 94:2893-2899, 2009.
16. Hofman A, Breteler MM, Van Duijn CM, Janssen HL, Krestin GP, Kuipers EJ, Stricker BH, Tiemeier H, Uitterlinden AG, Vingerling JR, Witteman JC: The Rotterdam Study: 2010 objectives and design update. *Eur. J. Epidemiol.* 24:553-572, 2009.
17. John U, Greiner B, Hensel E, et al: Study of Health In Pomerania (SHIP): a health examination survey in an east German region: objectives and design. *Soz. Praventivmed.* 46:186-194, 2001.
18. Volzke H, Alte D, Schmidt CO, et al: Cohort profile: the study of health in Pomerania. *Int. J. Epidemiol.* 40:294-307, 2011.
19. Mitchell BD, McArdle PF, Shen H, et al: The genetic response to short-term interventions affecting cardiovascular function: rationale and design of the Heredity and Phenotype Intervention (HAPI) Heart Study. *Am. Heart J.* 155:823-828, 2008.

20. Post W, Bielak LF, Ryan KA, Cheng YC, Shen H, Rumberger JA, Sheedy PF, Shuldiner AR, Peyser PA, Mitchell BD: Determinants of coronary artery and aortic calcification in the Old Order Amish. *Circulation* 115:717-724, 2007.
21. Aulchenko YS, Heutink P, Mackay I, Bertoli-Avella AM, Pullen J, Vaessen N, Rademaker TA, Sandkuijl LA, Cardon L, Oostra B, Van Duijn CM: Linkage disequilibrium in young genetically isolated Dutch population. *Eur. J. Hum. Genet* 12:527-534, 2004.
22. Kiechl S, Willeit J, for the Bruneck Study Group: The natural course of atherosclerosis. Part I: incidence and progression. *Arterioscler. Thromb. Vasc. Biol.* 19:1484-1490, 1999.
23. Kiechl S, Willeit J, for the Collaborative Study Group: The natural course of atherosclerosis. Part II: vascular remodeling. *Arterioscler. Thromb. Vasc. Biol.* 19:1491-1498, 1999.
24. Kiechl S, Lorenz E, Reindl M, Wiedermann CJ, Oberhollenzer F, Bonora E, Willeit J, Schwartz DA: Toll-like receptor 4 polymorphisms and atherogenesis. *N. Engl. J. Med.* 347:185-192, 2002.
25. Kronenberg F, Kronenberg MF, Kiechl S, Trenkwalder E, Santer P, Oberhollenzer F, Egger G, Utermann G, Willeit J: Role of lipoprotein(a) and apolipoprotein(a) phenotype in atherogenesis: prospective results from the Bruneck Study. *Circulation* 100:1154-1160, 1999.
26. Willeit J, Kiechl S, Oberhollenzer F, Rungger G, Egger G, Bonora E, Mitterer M, Muggeo M: Distinct risk profiles of early and advanced atherosclerosis : prospective results from the bruneck study. *Arterioscler. Thromb. Vasc. Biol.* 20:529-537, 2000.
27. Benn M, Nordestgaard BG, Jensen GB, Tybjaerg-Hansen A: Improving prediction of ischemic cardiovascular disease in the general population using apolipoprotein B: the Copenhagen City Heart Study. *Arterioscler Thromb Vasc Biol* 27:661-670, 2007.
28. Frikke-Schmidt R, Sing CF, Nordestgaard BG, Steffensen R, Tybjaerg-Hansen A: Subsets of SNPs define rare genotype classes that predict ischemic heart disease. *Hum Genet* 120:865-877, 2007.
29. Romeo S, Pennacchio LA, Fu Y, Boerwinkle E, Tybjaerg-Hansen A, Hobbs HH, Cohen JC: Population-based resequencing of ANGPTL4 uncovers variations that reduce triglycerides and increase HDL. *Nat Genet* 39:513-516, 2007.
30. Bild DE, Bluemke DA, Burke GL, et al: Multi-ethnic study of atherosclerosis: objectives and design. *Am. J. Epidemiol.* 156:871-881, 2002.
31. McQuillan GM, Porter KS, Agelli M, Kington R: Consent for genetic research in a general population: the NHANES experience. *Genet Med* 5:35-42, 2003.
32. McQuillan GM, Pan Q, Porter KS: Consent for genetic research in a general population: an update on the National Health and Nutrition Examination Survey experience. *Genet Med* 8:354-360, 2006.
33. Rantner B, Kollerits B, Anderwald-Stadler M, Klein-Weigel P, Gruber I, Gehringer A, Haak M, Schnapka-Köpf M, Fraedrich G, Kronenberg F: Association between the *UGT1A1* TA-repeat polymorphism and bilirubin concentration in patients with intermittent claudication: results from the CAVASIC Study. *Clin. Chem.* 54:851-857, 2008.
34. Sacks D, Bakal CW, Beatty PT, Becker GJ, Cardella JF, Raabe RD, Wiener HM, Lewis CA: Position statement on the use of the ankle brachial index in the evaluation of patients with peripheral vascular disease. A consensus statement developed by the Standards Division of the Society of Interventional Radiology. *J. Vasc. Interv. Radiol.* 14:S389, 2003.
35. Chen YH, Liu CK, Chang SC, Lin YJ, Tsai MF, Chen YT, Yao A: GenoWatch: a disease gene mining browser for association study. *Nucleic Acids Res.* 36:W336-W340, 2008.
36. Hindorff LA, Sethupathy P, Junkins HA, Ramos EM, Mehta JP, Collins FS, Manolio TA: Potential etiologic and functional implications of genome-wide association loci for human diseases and traits. *Proc. Natl. Acad. Sci. U. S. A* 106:9362-9367, 2009.
37. Yu W, Clyne M, Khoury MJ, Gwinn M: Phenopedia and Genopedia: disease-centered and gene-centered views of the evolving knowledge of human genetic associations. *Bioinformatics* 26:145-146, 2010.
38. Gao X: Multiple testing corrections for imputed SNPs. *Genet Epidemiol.* 35:154-158, 2011.

39. Benjamini Y, Hochberg Y: Controlling the false discovery rate: a practical and powerful approach to multiple testing. *J. R. Stat. Soc. , Series B* 57:289-300, 1995.
40. Renner W, Pabst E, Paulweber B, Malaimare L, Iglseider B, Wascher TC, Pilger E: The angiotensin-converting-enzyme insertion/deletion polymorphism is not a risk factor for peripheral arterial disease. *Atherosclerosis* 165:175-178, 2002.
41. Schelleman H, Klungel OH, Witteman JC, Hofman A, Van Duijn CM, de BA, Stricker BH: Pharmacogenetic interactions of three candidate gene polymorphisms with ACE-inhibitors or beta-blockers and the risk of atherosclerosis. *Br. J. Clin. Pharmacol.* 64:57-66, 2007.
42. Li R, Nicklas B, Pahor M, Newman A, Sutton-Tyrrell K, Harris T, Lakatta E, Bauer DC, Ding J, Satterfield S, Kritchevsky SB: Polymorphisms of angiotensinogen and angiotensin-converting enzyme associated with lower extremity arterial disease in the Health, Aging and Body Composition study. *J. Hum. Hypertens.* 21:673-682, 2007.
43. Sticchi E, Sofi F, Romagnuolo I, Pratesi G, Pulli R, Pratesi C, Abbate R, Fatini C: eNOS and ACE genes influence peripheral arterial disease predisposition in smokers. *J. Vasc. Surg.* 52:97-102, 2010.
44. Fatini C, Sticchi E, Sofi F, Said AA, Pratesi G, Pulli R, Pratesi C, Abbate R: Multilocus analysis in candidate genes ACE, AGT, and AGTR1 and predisposition to peripheral arterial disease: role of ACE D/-240T haplotype. *J. Vasc. Surg.* 50:1399-1404, 2009.
45. Park EY, Ahn HM, Lee JA, Hong YM: Insertion/deletion polymorphism of angiotensin converting enzyme gene in Korean hypertensive adolescents. *Heart Vessels* 24:193-198, 2009.
46. Morrison AC, Bray MS, Folsom AR, Boerwinkle E: ADD1 460W allele associated with cardiovascular disease in hypertensive individuals. *Hypertension* 39:1053-1057, 2002.
47. Hindorff LA, Heckbert SR, Psaty BM, Lumley T, Siscovick DS, Herrington DM, Edwards KL, Tracy RP: beta(2)-Adrenergic receptor polymorphisms and determinants of cardiovascular risk: the Cardiovascular Health Study. *Am. J. Hypertens.* 18:392-397, 2005.
48. Tsai PC, Lin TH, Hsu PC, Wang YS, Liao YC, Juo SH: Polymorphism of 270 A>G in BRAP is Associated with Lower Ankle-Brachial Index in a Taiwanese Population. *J. Atheroscler. Thromb.* 0:2011.
49. Cluett C, McDermott MM, Guralnik J, et al: The 9p21 myocardial infarction risk allele increases risk of peripheral artery disease in older people. *Circ. Cardiovasc. Genet* 2:347-353, 2009.
50. Scherer ML, Nalls MA, Pawlikowska L, et al: Admixture mapping of ankle-arm index: identification of a candidate locus associated with peripheral arterial disease. *J. Med. Genet* 47:1-7, 2010.
51. Thorgeirsson TE, Geller F, Sulem P, et al: A variant associated with nicotine dependence, lung cancer and peripheral arterial disease. *Nature* 452:638-642, 2008.
52. Zintzaras E, Zdoukopoulos N: A field synopsis and meta-analysis of genetic association studies in peripheral arterial disease: The CUMAGAS-PAD database. *Am. J. Epidemiol.* 170:1-11, 2009.
53. Flex A, Gaetani E, Angelini F, Sabusco A, Chilla C, Straface G, Biscetti F, Pola P, Castellot JJ, Jr., Pola R: Pro-inflammatory genetic profiles in subjects with peripheral arterial occlusive disease and critical limb ischemia. *J. Intern. Med.* 262:124-130, 2007.
54. Pitha J, Hubacek JA, Pithova P: The connexin 37 (1019C>T) gene polymorphism is associated with subclinical atherosclerosis in women with type 1 and 2 diabetes and in women with central obesity. *Physiol Res.* 59:1029-1032, 2010.
55. Katakami N, Sakamoto K, Kaneto H, Matsuhisa M, Shimizu I, Ishibashi F, Osonoi T, Kashiwagi A, Kawamori R, Hori M, Yamasaki Y: Association between the connexin37 polymorphism and peripheral arterial disease in subjects with type 2 diabetes. *Diabetes Care* 32:e53-e54, 2009.
56. Gugl A, Renner W, Seinost G, Brodmann M, Pabst E, Wascher TC, Paulweber B, Iglseider B, Pilger E: Two polymorphisms in the fractalkine receptor CX3CR1 are not associated with peripheral arterial disease. *Atherosclerosis* 166:339-343, 2003.
57. Renner W, Schallmoser K, Gallippi P, Krauss C, Toplak H, Wascher TC, Pilger E: C242T polymorphism of the p22 phox gene is not associated with peripheral arterial occlusive disease. *Atherosclerosis* 152:175-179, 2000.

58. Kaur-Knudsen D, Bojesen SE, Nordestgaard BG: Common polymorphisms in CYP2C9, subclinical atherosclerosis and risk of ischemic vascular disease in 52,000 individuals. *Pharmacogenomics. J.* 9:327-332, 2009.
59. Gretarsdottir S, Baas AF, Thorleifsson G, et al: Genome-wide association study identifies a sequence variant within the DAB2IP gene conferring susceptibility to abdominal aortic aneurysm. *Nat. Genet* 42:692-697, 2010.
60. Eller P, Schgoer W, Mueller T, Tancevski I, Demetz E, Duwensee K, Ritsch A, Haltmayer M, Patsch JR: The K121Q polymorphism of ENPP1 and peripheral arterial disease. *Heart Vessels* 23:104-107, 2008.
61. Shaker O, Zahra A, Sayed A, Refaat A, El-Khaiat Z, Hegazy G, El-Hindawi K, Ay-El DM: Role of ICAM-1 and E-selectin gene polymorphisms in pathogenesis of PAOD in Egyptian patients. *Vasc. Health Risk Manag.* 6:9-15, 2010.
62. Renner W, Brodmann M, Pabst E, Stanger O, Wascher TC, Pilger E: The V34L polymorphism of factor XIII and peripheral arterial disease. *Int. Angiol.* 21:53-57, 2002.
63. Renner W, Koppel H, Brodmann M, Pabst E, Schallmoser K, Toplak H, Wascher TC, Pilger E: Factor II G20210A and factor V G1691A gene mutations and peripheral arterial occlusive disease. *Thromb. Haemost.* 83:20-22, 2000.
64. Reny JL, Alhenc-Gelas M, Fontana P, Bissery A, Julia PL, Fiessinger JN, Aiach M, Emmerich J: The factor II G20210A gene polymorphism, but not factor V Arg506Gln, is associated with peripheral arterial disease: results of a case-control study. *J. Thromb. Haemost.* 2:1334-1340, 2004.
65. Sofi F, Lari B, Rogolino A, Marcucci R, Pratesi G, Dorigo W, Pratesi C, Gensini GF, Abbate R, Prisco D: Thrombophilic risk factors for symptomatic peripheral arterial disease. *J. Vasc. Surg.* 41:255-260, 2005.
66. Mueller T, Marschon R, Dieplinger B, Haidinger D, Gegenhuber A, Poelz W, Webersinke G, Haltmayer M: Factor V Leiden, prothrombin G20210A, and methylenetetrahydrofolate reductase C677T mutations are not associated with chronic limb ischemia: the Linz Peripheral Arterial Disease (LIPAD) study. *J. Vasc. Surg.* 41:808-815, 2005.
67. Lee AJ, Fowkes FG, Lowe GD, Connor JM, Rumley A: Fibrinogen, factor VII and PAI-1 genotypes and the risk of coronary and peripheral atherosclerosis: Edinburgh Artery Study. *Thromb. Haemost.* 81:553-560, 1999.
68. Serve E, Reny JL, Akhavan S, Emmerich J, Fischer AM, Tapon-Bretondiere J: A two adenine insertion polymorphism in the 3' untranslated region of factor VII gene is associated with peripheral arterial disease but not with venous thrombosis. Results of case-control studies. *Thromb. Haemost.* 98:733-737, 2007.
69. Parry DJ, Grant PJ, Scott DJ: Atherothrombotic risk factor clustering in healthy male relatives of male patients with intermittent claudication. *J. Vasc. Surg.* 40:891-898, 2004.
70. Fowkes FG, Connor JM, Smith FB, Wood J, Donnan PT, Lowe GD: Fibrinogen genotype and risk of peripheral atherosclerosis. *Lancet* 339:693-696, 1992.
71. Smith FB, Connor JM, Lee AJ, Cooke A, Lowe GD, Rumley A, Fowkes FG: Relationship of the platelet glycoprotein PIA and fibrinogen T/G+1689 polymorphisms with peripheral arterial disease and ischaemic heart disease. *Thromb. Res.* 112:209-216, 2003.
72. Klein RL, Hunter SJ, Jenkins AJ, Zheng D, Semler AJ, Clore J, Garvey WT: Fibrinogen is a marker for nephropathy and peripheral vascular disease in type 1 diabetes: studies of plasma fibrinogen and fibrinogen gene polymorphism in the DCCT/EDIC cohort. *Diabetes Care* 26:1439-1448, 2003.
73. Bahadori B, Uitz E, Dehchamani D, Pilger E, Renner W: The fibrinogen gamma 10034C>T polymorphism is not associated with Peripheral Arterial Disease. *Thromb. Res.* 126:350-352, 2010.
74. Yazdani-Biuki B, Krippel P, Brickmann K, Fuerst F, Langsenlehner U, Paulweber B, Pilger E, Wascher TC, Brezinschek HP, Renner W: The functional promoter polymorphism of the coagulation factor XII gene is not associated with peripheral arterial disease. *Angiology* 61:211-215, 2010.

75. Li R, Folsom AR, Sharrett AR, Couper D, Bray M, Tyroler HA: Interaction of the glutathione S-transferase genes and cigarette smoking on risk of lower extremity arterial disease: the Atherosclerosis Risk in Communities (ARIC) study. *Atherosclerosis* 154:729-738, 2001.
76. Koppel H, Krippel P, Gasser R, Wascher TC, Paulweber B, Pilger E, Renner W: Hemochromatosis gene (HFE) polymorphisms are not associated with peripheral arterial disease. *Thromb. Haemost.* 91:1258-1259, 2004.
77. Bahadori B, Uitz E, Mayer A, Harauer J, Dam K, Truschnig-Wilders M, Pilger E, Renner W: Polymorphisms of the hypoxia-inducible factor 1 gene and peripheral artery disease. *Vasc. Med.* 15:371-374, 2010.
78. Delanghe J, Langlois M, Duprez D, De BM, Clement D: Haptoglobin polymorphism and peripheral arterial occlusive disease. *Atherosclerosis* 145:287-292, 1999.
79. Potaczek DP, Krzanowski M, Sanak M: [Interleukin-1beta C+3953T gene polymorphism and peripheral arterial occlusive disease in Polish population]. *Przegl. Lek.* 62:830-832, 2005.
80. Libra M, Signorelli SS, Bevelacqua Y, Navolanic PM, Bevelacqua V, Polesel J, Talamini R, Stivala F, Mazarino MC, Malaponte G: Analysis of G(-174)C IL-6 polymorphism and plasma concentrations of inflammatory markers in patients with type 2 diabetes and peripheral arterial disease. *J. Clin. Pathol.* 59:211-215, 2006.
81. Renner W, Brodmann M, Winkler M, Washer TC, Pilger E: The PLA1/A2 polymorphism of platelet glycoprotein IIIa is not associated with peripheral arterial disease. *Thromb. Haemost.* 85:745-746, 2001.
82. Eller P, Schgoer W, Mueller T, Tancevski I, Wehinger A, Ulmer H, Foeger B, Haltmayer M, Ritsch A, Patsch JR: Hepatic lipase polymorphism and increased risk of peripheral arterial disease. *J. Intern. Med.* 258:344-348, 2005.
83. Dieplinger B, Lingenhel A, Baumgartner N, Poelz W, Dieplinger H, Haltmayer M, Kronenberg F, Mueller T: Increased serum lipoprotein(a) concentrations and low molecular weight phenotypes of apolipoprotein(a) are associated with symptomatic peripheral arterial disease. *Clin. Chem.* 53:1298-1305, 2007.
84. Catalano M, Cortelazzo A, Yilmaz Y, Perilli E, Carzaniga G, Emanuele E: The LPA gene C93T polymorphism influences plasma lipoprotein(a) levels and is independently associated with susceptibility to peripheral arterial disease. *Clin. Chim. Acta* 387:109-112, 2008.
85. Khandanpour N, Willis G, Meyer FJ, Armon MP, Loke YK, Wright AJ, Finglas PM, Jennings BA: Peripheral arterial disease and methylenetetrahydrofolate reductase (MTHFR) C677T mutations: A case-control study and meta-analysis. *J. Vasc. Surg.* 49:711-718, 2009.
86. Schgoer W, Eller P, Mueller T, Tancevski I, Wehinger A, Ulmer H, Sandhofer A, Ritsch A, Haltmayer M, Patsch JR: The MTP -493TT genotype is associated with peripheral arterial disease: results from the Linz Peripheral Arterial Disease (LIPAD) Study. *Clin. Biochem.* 41:712-716, 2008.
87. Kullo IJ, Greene MT, Boerwinkle E, Chu J, Turner ST, Kardina SL: Association of polymorphisms in NOS3 with the ankle-brachial index in hypertensive adults. *Atherosclerosis* 196:905-912, 2008.
88. Fontana P, Gaussem P, Aiach M, Fiessinger JN, Emmerich J, Reny JL: P2Y12 H2 haplotype is associated with peripheral arterial disease: a case-control study. *Circulation* 108:2971-2973, 2003.
89. Unno N, Sakaguchi T, Nakamura T, Yamamoto N, Sugatani J, Miwa M, Konno H: A single nucleotide polymorphism in the plasma PAF acetylhydrolase gene and risk of atherosclerosis in Japanese patients with peripheral artery occlusive disease. *J. Surg. Res.* 134:36-43, 2006.
90. Catalano M, Cortelazzo A, Santi R, Contino L, Demicheli M, Yilmaz Y, Zorzetto M, Campo I, Lanati N, Emanuele E: The Pro12Ala polymorphism of peroxisome proliferator-activated receptor-gamma2 gene is associated with plasma levels of soluble RAGE (Receptor for Advanced Glycation Endproducts) and the presence of peripheral arterial disease. *Clin. Biochem.* 41:981-985, 2008.



91. Ritsch A, Sonderegger G, Sandhofer A, Stanzl U, Tancevski I, Eller P, Schgoer W, Wehinger A, Mueller T, Haltmayer M, Patsch JR: Scavenger receptor class B type I polymorphisms and peripheral arterial disease. *Metabolism* 56:1135-1141, 2007.
92. Jiang YD, Chang YC, Chiu YF, Chang TJ, Li HY, Lin WH, Yuan HY, Chen YT, Chuang LM: SLC2A10 genetic polymorphism predicts development of peripheral arterial disease in patients with type 2 diabetes. SLC2A10 and PAD in type 2 diabetes. *BMC Med. Genet* 11:126, 2010.
93. Signorelli SS, Barresi V, Musso N, Anzaldi M, Croce E, Fiore V, Condorelli DF: Polymorphisms of steroid 5-alpha-reductase type I (SRD5A1) gene are associated to peripheral arterial disease. *J. Endocrinol. Invest* 31:1092-1097, 2008.
94. Smadja DM, Lorient MA, Hindorff LA, Mellottee L, Gaussem P, Emmerich J: No clear link between VKORC1 genetic polymorphism and the risk of venous thrombosis or peripheral arterial disease. *Thromb. Haemost.* 99:970-972, 2008.
95. Stene MC, Frikke-Schmidt R, Nordestgaard BG, Grande P, Schnohr P, Tybjaerg-Hansen A: Functional promoter variant in zinc finger protein 202 predicts severe atherosclerosis and ischemic heart disease. *J. Am. Coll. Cardiol.* 52:369-377, 2008.
96. Weatherley BD, Nelson JJ, Heiss G, Chambless LE, Sharrett AR, Nieto FJ, Folsom AR, Rosamond WD: The association of the ankle-brachial index with incident coronary heart disease: the Atherosclerosis Risk In Communities (ARIC) study, 1987-2001. *BMC Cardiovasc. Disord.* 7:3, 2007.
97. Newman AB, Siscovick DS, Manolio TA, Polak J, Fried LP, Borhani NO, Wolfson SK: Ankle-arm index as a marker of atherosclerosis in the Cardiovascular Health Study. Cardiovascular Health Study (CHS) Collaborative Research Group. *Circulation* 88:837-845, 1993.
98. Murabito JM, Evans JC, Larson MG, Nieto K, Levy D, Wilson PW: The ankle-brachial index in the elderly and risk of stroke, coronary disease, and death: the Framingham Study. *Arch. Intern. Med.* 163:1939-1942, 2003.
99. Murabito JM, Evans JC, Nieto K, Larson MG, Levy D, Wilson PW: Prevalence and clinical correlates of peripheral arterial disease in the Framingham Offspring Study. *Am. Heart J.* 143:961-965, 2002.
100. Kardia SL, Greene MT, Boerwinkle E, Turner ST, Kullo IJ: Investigating the complex genetic architecture of ankle-brachial index, a measure of peripheral arterial disease, in non-Hispanic whites. *BMC Med Genomics* 1:16, 2008.
101. McDermott MM, Guralnik JM, Albay M, Bandinelli S, Miniati B, Ferrucci L: Impairments of muscles and nerves associated with peripheral arterial disease and their relationship with lower extremity functioning: the InCHIANTI Study. *J. Am. Geriatr. Soc.* 52:405-410, 2004.
102. Meijer WT, Hoes AW, Rutgers D, Bots ML, Hofman A, Grobbee DE: Peripheral arterial disease in the elderly - The Rotterdam study. *Arterioscler. Thromb. Vasc. Biol.* 18:185-192, 1998.
103. Hiatt WR, Hoag S, Hamman RF: Effect of diagnostic criteria on the prevalence of peripheral arterial disease. The San Luis Valley Diabetes Study. *Circulation* 91:1472-1479, 1995.
104. Hirsch AT, Criqui MH, Treat-Jacobson D, Regensteiner JG, Creager MA, Olin JW, Krook SH, Hunninghake DB, Comerota AJ, Walsh ME, McDermott MM, Hiatt WR: Peripheral arterial disease detection, awareness, and treatment in primary care. *JAMA* 286:1317-1324, 2001.
105. Sadrzadeh Rafie AH, Stefanick ML, Sims ST, Phan T, Higgins M, Gabriel A, Assimes T, Narasimhan B, Nead KT, Myers J, Olin J, Cooke JP: Sex differences in the prevalence of peripheral artery disease in patients undergoing coronary catheterization. *Vasc. Med* 15:443-450, 2010.

**Supplementary Table 6: Overall Meta-analysis Results and Study Specific Results: ABI-SNP Associations with p<10<sup>-5</sup>**

| Meta-analysis results, population isolates excluded |     |                   |         |         |                    |         |        |          |                        |         |              |
|-----------------------------------------------------|-----|-------------------|---------|---------|--------------------|---------|--------|----------|------------------------|---------|--------------|
| SNP                                                 | Chr | Physical Position | Allele1 | Allele2 | Allele 1 frequency | Beta    | SE     | P value  | P <sub>het</sub> value | Total N | Closest gene |
| rs10757269                                          | 9   | 22062264          | a       | g       | 0.5057             | 0.0056  | 0.001  | 2.46E-08 | 0.2294                 | 35036   | CDKN2B       |
| rs9632884                                           | 9   | 22062301          | c       | g       | 0.4945             | -0.0055 | 0.001  | 2.89E-08 | 0.2555                 | 35035   | CDKN2B       |
| rs10811647                                          | 9   | 22055002          | c       | g       | 0.5692             | 0.0054  | 0.001  | 8.39E-08 | 0.3306                 | 35306   | CDKN2B       |
| rs10811650                                          | 9   | 22057593          | a       | g       | 0.569              | 0.0054  | 0.001  | 9.17E-08 | 0.323                  | 35305   | CDKN2B       |
| rs1537375                                           | 9   | 22106071          | t       | c       | 0.4831             | 0.0053  | 0.001  | 1.06E-07 | 0.05722                | 35303   | CDKN2B       |
| rs2383207                                           | 9   | 22105959          | a       | g       | 0.4827             | 0.0053  | 0.001  | 1.12E-07 | 0.05728                | 35308   | CDKN2B       |
| rs1537374                                           | 9   | 22106046          | a       | g       | 0.4829             | 0.0053  | 0.001  | 1.22E-07 | 0.05755                | 35303   | CDKN2B       |
| rs1004638                                           | 9   | 22105589          | a       | t       | 0.4836             | 0.0053  | 0.001  | 1.43E-07 | 0.06191                | 35303   | CDKN2B       |
| rs944797                                            | 9   | 22105286          | t       | c       | 0.484              | 0.0053  | 0.001  | 1.45E-07 | 0.06293                | 35303   | CDKN2B       |
| rs10511701                                          | 9   | 22102599          | t       | c       | 0.4795             | 0.0053  | 0.001  | 1.46E-07 | 0.07575                | 35274   | CDKN2B       |
| rs7341786                                           | 9   | 22102241          | a       | c       | 0.4796             | 0.0053  | 0.001  | 1.46E-07 | 0.07571                | 35274   | CDKN2B       |
| rs615552                                            | 9   | 22016077          | t       | c       | 0.5665             | -0.0053 | 0.001  | 1.52E-07 | 0.8319                 | 35397   | CDKN2B       |
| rs10738604                                          | 9   | 22015493          | a       | g       | 0.3618             | -0.0055 | 0.0011 | 1.71E-07 | 0.6335                 | 35364   | CDKN2B       |
| rs2383206                                           | 9   | 22105026          | a       | g       | 0.4841             | 0.0052  | 0.001  | 1.77E-07 | 0.07524                | 35304   | CDKN2B       |
| rs10738609                                          | 9   | 22104495          | a       | g       | 0.4843             | 0.0052  | 0.001  | 1.79E-07 | 0.07523                | 35304   | CDKN2B       |
| rs10733376                                          | 9   | 22104469          | c       | g       | 0.5156             | -0.0052 | 0.001  | 1.79E-07 | 0.0751                 | 35304   | CDKN2B       |
| rs10738610                                          | 9   | 22113766          | a       | c       | 0.489              | 0.0053  | 0.001  | 1.87E-07 | 0.0537                 | 35330   | CDKN2B       |
| rs1333046                                           | 9   | 22114123          | a       | t       | 0.5111             | -0.0053 | 0.001  | 1.91E-07 | 0.0535                 | 35330   | CDKN2B       |
| rs7859362                                           | 9   | 22095927          | t       | c       | 0.4849             | 0.0052  | 0.001  | 2.10E-07 | 0.07804                | 35305   | CDKN2B       |
| rs1412834                                           | 9   | 22100131          | t       | c       | 0.4847             | 0.0052  | 0.001  | 2.10E-07 | 0.07823                | 35304   | CDKN2B       |
| rs1333042                                           | 9   | 22093813          | a       | g       | 0.499              | 0.0052  | 0.001  | 2.15E-07 | 0.0905                 | 35354   | CDKN2B       |
| rs6475606                                           | 9   | 22071850          | t       | c       | 0.4873             | -0.0051 | 0.001  | 2.43E-07 | 0.229                  | 35411   | CDKN2B       |
| rs10116277                                          | 9   | 22071397          | t       | g       | 0.4871             | -0.0051 | 0.001  | 2.80E-07 | 0.2044                 | 35236   | CDKN2B       |
| rs523096                                            | 9   | 22009129          | a       | g       | 0.5615             | -0.0052 | 0.001  | 3.36E-07 | 0.891                  | 35401   | CDKN2B       |
| rs4659996                                           | 1   | 238912747         | a       | g       | 0.4846             | -0.006  | 0.0012 | 4.44E-07 | 0.3354                 | 28087   | GREM2        |
| rs7003385                                           | 8   | 41705907          | t       | c       | 0.6656             | -0.0053 | 0.0011 | 5.24E-07 | 0.4894                 | 35375   | ANK1         |
| rs3218020                                           | 9   | 21987872          | a       | g       | 0.3485             | -0.0054 | 0.0011 | 6.36E-07 | 0.6896                 | 35095   | CDKN2A       |
| rs10811644                                          | 9   | 22015067          | a       | t       | 0.542              | 0.005   | 0.001  | 6.63E-07 | 0.3091                 | 35394   | CDKN2B       |
| rs7035484                                           | 9   | 22015240          | c       | g       | 0.5421             | 0.005   | 0.001  | 6.86E-07 | 0.3098                 | 35395   | CDKN2B       |
| rs1333043                                           | 9   | 22096731          | a       | t       | 0.5036             | -0.0049 | 0.001  | 8.00E-07 | 0.04727                | 35314   | CDKN2B       |
| rs564398                                            | 9   | 22019547          | t       | c       | 0.582              | -0.0049 | 0.001  | 9.83E-07 | 0.8683                 | 35407   | CDKN2B       |
| rs634537                                            | 9   | 22022152          | t       | g       | 0.5834             | -0.0049 | 0.001  | 1.01E-06 | 0.897                  | 35400   | CDKN2B       |
| rs7865618                                           | 9   | 22021005          | a       | g       | 0.5725             | -0.0049 | 0.001  | 1.08E-06 | 0.8914                 | 35411   | CDKN2B       |
| rs2069418                                           | 9   | 21999698          | c       | g       | 0.542              | -0.005  | 0.001  | 1.08E-06 | 0.8796                 | 35224   | CDKN2B       |
| rs543830                                            | 9   | 22016639          | a       | t       | 0.5849             | -0.0049 | 0.001  | 1.14E-06 | 0.8487                 | 35401   | CDKN2B       |
| rs2157719                                           | 9   | 22023366          | t       | c       | 0.5739             | -0.0049 | 0.001  | 1.21E-06 | 0.9112                 | 35382   | CDKN2B       |
| rs679038                                            | 9   | 22019080          | a       | g       | 0.4156             | 0.0049  | 0.001  | 1.26E-06 | 0.8549                 | 35409   | CDKN2B       |
| rs7044859                                           | 9   | 22008781          | a       | t       | 0.4537             | -0.0049 | 0.001  | 1.36E-06 | 0.3891                 | 35394   | CDKN2B       |
| rs10757272                                          | 9   | 22078260          | t       | c       | 0.4904             | -0.0048 | 0.001  | 1.45E-06 | 0.06182                | 35411   | CDKN2B       |
| rs1008878                                           | 9   | 22026112          | t       | g       | 0.5803             | -0.0049 | 0.001  | 1.49E-06 | 0.9102                 | 35196   | CDKN2B       |
| rs1333048                                           | 9   | 22115347          | a       | c       | 0.4997             | 0.0049  | 0.001  | 1.50E-06 | 0.03292                | 35369   | CDKN2B       |
| rs10738607                                          | 9   | 22078094          | a       | g       | 0.5079             | 0.0048  | 0.001  | 1.60E-06 | 0.06705                | 35409   | CDKN2B       |
| rs2106120                                           | 9   | 22007101          | t       | g       | 0.4538             | -0.0048 | 0.001  | 1.75E-06 | 0.3937                 | 35391   | CDKN2B       |
| rs2106119                                           | 9   | 22007550          | a       | g       | 0.5461             | 0.0048  | 0.001  | 1.76E-06 | 0.3926                 | 35393   | CDKN2B       |
| rs1537370                                           | 9   | 22074310          | t       | c       | 0.4894             | -0.0048 | 0.001  | 1.79E-06 | 0.1455                 | 35241   | CDKN2B       |
| rs10811640                                          | 9   | 22003411          | t       | g       | 0.4519             | -0.0048 | 0.001  | 1.83E-06 | 0.4239                 | 35350   | CDKN2B       |
| rs1556516                                           | 9   | 22090176          | c       | g       | 0.4909             | -0.0047 | 0.001  | 1.91E-06 | 0.05805                | 35406   | CDKN2B       |
| rs1537371                                           | 9   | 22089568          | a       | c       | 0.4909             | -0.0047 | 0.001  | 1.93E-06 | 0.05815                | 35406   | CDKN2B       |
| rs1412829                                           | 9   | 22033926          | a       | g       | 0.582              | -0.0048 | 0.001  | 1.95E-06 | 0.911                  | 35355   | CDKN2B       |
| rs10811641                                          | 9   | 22004137          | c       | g       | 0.6318             | 0.0049  | 0.001  | 2.14E-06 | 0.7504                 | 35356   | CDKN2B       |

|            |    |           |   |   |        |         |        |          |         |       |        |
|------------|----|-----------|---|---|--------|---------|--------|----------|---------|-------|--------|
| rs7859727  | 9  | 22092165  | t | c | 0.4892 | -0.0047 | 0.001  | 2.19E-06 | 0.05953 | 35406 | CDKN2B |
| rs1537373  | 9  | 22093341  | t | g | 0.5112 | 0.0047  | 0.001  | 2.28E-06 | 0.05976 | 35406 | CDKN2B |
| rs2891168  | 9  | 22088619  | a | g | 0.5095 | 0.0047  | 0.001  | 2.32E-06 | 0.0655  | 35410 | CDKN2B |
| rs4977574  | 9  | 22088574  | a | g | 0.5094 | 0.0047  | 0.001  | 2.33E-06 | 0.06531 | 35411 | CDKN2B |
| rs2069416  | 9  | 22000004  | a | t | 0.3576 | -0.005  | 0.0011 | 2.37E-06 | 0.744   | 35254 | CDKN2B |
| rs1556515  | 9  | 22026367  | t | c | 0.5815 | -0.0048 | 0.001  | 2.48E-06 | 0.9065  | 35196 | CDKN2B |
| rs1333037  | 9  | 22030765  | t | c | 0.5741 | -0.0047 | 0.001  | 3.60E-06 | 0.9059  | 35356 | CDKN2B |
| rs2099861  | 8  | 41700444  | t | c | 0.3664 | -0.0048 | 0.001  | 3.64E-06 | 0.1513  | 35386 | ANK1   |
| rs819750   | 1  | 99469651  | t | g | 0.8772 | 0.007   | 0.0015 | 3.65E-06 | 0.5103  | 35278 | LPPR4  |
| rs1063192  | 9  | 21993367  | a | g | 0.5676 | -0.0047 | 0.001  | 3.82E-06 | 0.9158  | 35268 | CDKN2B |
| rs819748   | 1  | 99467756  | a | c | 0.8762 | 0.007   | 0.0015 | 4.19E-06 | 0.5079  | 35291 | LPPR4  |
| rs10757278 | 9  | 22114477  | a | g | 0.5167 | 0.0047  | 0.001  | 4.43E-06 | 0.0157  | 35348 | CDKN2B |
| rs1333047  | 9  | 22114504  | a | t | 0.5166 | 0.0047  | 0.001  | 4.47E-06 | 0.01568 | 35348 | CDKN2B |
| rs10115049 | 9  | 22022119  | a | g | 0.5233 | 0.0046  | 0.001  | 4.61E-06 | 0.5317  | 35383 | CDKN2B |
| rs1360589  | 9  | 22035317  | t | c | 0.5746 | -0.0046 | 0.001  | 4.62E-06 | 0.8514  | 35355 | CDKN2B |
| rs9485528  | 6  | 102221473 | a | g | 0.1699 | -0.0061 | 0.0013 | 4.63E-06 | 0.7808  | 35339 | GRIK2  |
| rs1872877  | 8  | 41704728  | t | c | 0.6336 | 0.0047  | 0.001  | 4.66E-06 | 0.167   | 35391 | ANK1   |
| rs10965212 | 9  | 22013795  | a | t | 0.4768 | -0.0046 | 0.001  | 4.85E-06 | 0.3242  | 35405 | CDKN2B |
| rs819746   | 1  | 99466332  | a | c | 0.8757 | 0.0069  | 0.0015 | 5.04E-06 | 0.4729  | 35316 | LPPR4  |
| rs4977575  | 9  | 22114744  | c | g | 0.5166 | 0.0046  | 0.001  | 5.47E-06 | 0.01628 | 35348 | CDKN2B |
| rs1333049  | 9  | 22115503  | c | g | 0.483  | -0.0046 | 0.001  | 5.51E-06 | 0.01224 | 35358 | CDKN2B |
| rs7030641  | 9  | 22044040  | t | c | 0.573  | -0.0046 | 0.001  | 5.68E-06 | 0.8398  | 35394 | CDKN2B |
| rs2279437  | 8  | 41707343  | a | g | 0.3652 | -0.0047 | 0.001  | 5.69E-06 | 0.1507  | 35368 | ANK1   |
| rs819797   | 1  | 99459990  | a | g | 0.866  | 0.0069  | 0.0015 | 5.74E-06 | 0.3963  | 35101 | LPPR4  |
| rs944801   | 9  | 22041670  | c | g | 0.5739 | -0.0046 | 0.001  | 5.80E-06 | 0.8418  | 35396 | CDKN2B |
| rs722453   | 7  | 84037497  | a | g | 0.5771 | 0.0054  | 0.0012 | 6.43E-06 | 0.6902  | 26200 | SEMA3A |
| rs7780912  | 7  | 84110129  | a | g | 0.5769 | 0.0053  | 0.0012 | 6.57E-06 | 0.7077  | 26171 | SEMA3D |
| rs7028570  | 9  | 22038683  | a | g | 0.4808 | -0.0045 | 0.001  | 6.60E-06 | 0.4655  | 35342 | CDKN2B |
| rs2151280  | 9  | 22024719  | a | g | 0.4825 | -0.0045 | 0.001  | 6.73E-06 | 0.529   | 35205 | CDKN2B |
| rs1360590  | 9  | 22031443  | t | c | 0.5207 | 0.0045  | 0.001  | 6.81E-06 | 0.4601  | 35359 | CDKN2B |
| rs1591136  | 9  | 22016834  | c | g | 0.4767 | -0.0045 | 0.001  | 6.85E-06 | 0.3436  | 35401 | CDKN2B |
| rs10120688 | 9  | 22046499  | a | g | 0.4881 | -0.0045 | 0.001  | 7.19E-06 | 0.5001  | 35408 | CDKN2B |
| rs16824978 | 2  | 211380306 | t | c | 0.2501 | -0.0054 | 0.0012 | 7.77E-06 | 0.3732  | 34950 | CPS1   |
| rs7049105  | 9  | 22018801  | a | g | 0.5234 | 0.0045  | 0.001  | 7.88E-06 | 0.3545  | 35404 | CDKN2B |
| rs10965224 | 9  | 22057276  | a | t | 0.5993 | -0.0045 | 0.001  | 8.13E-06 | 0.5374  | 35394 | CDKN2B |
| rs10965219 | 9  | 22043687  | a | g | 0.5199 | 0.0045  | 0.001  | 8.19E-06 | 0.3665  | 35390 | CDKN2B |
| rs7530667  | 1  | 99464320  | t | c | 0.3874 | -0.0045 | 0.001  | 8.43E-06 | 0.1114  | 35391 | LPPR4  |
| rs1537378  | 9  | 22051614  | a | g | 0.3994 | 0.0045  | 0.001  | 8.49E-06 | 0.6196  | 35376 | CDKN2B |
| rs8181050  | 9  | 22054391  | a | g | 0.5995 | -0.0045 | 0.001  | 8.75E-06 | 0.5883  | 35405 | CDKN2B |
| rs4977756  | 9  | 22058652  | a | g | 0.6006 | -0.0045 | 0.001  | 8.82E-06 | 0.5672  | 35405 | CDKN2B |
| rs1333039  | 9  | 22055657  | c | g | 0.5995 | -0.0045 | 0.001  | 8.86E-06 | 0.5856  | 35405 | CDKN2B |
| rs7311009  | 12 | 94859134  | c | g | 0.9711 | 0.0152  | 0.0034 | 8.94E-06 | 0.965   | 30436 | CCDC38 |
| rs10811651 | 9  | 22057830  | a | g | 0.5997 | -0.0045 | 0.001  | 9.22E-06 | 0.5821  | 35404 | CDKN2B |
| rs518394   | 9  | 22009673  | c | g | 0.4011 | 0.0047  | 0.0011 | 9.38E-06 | 0.8702  | 35252 | CDKN2B |
| rs819756   | 1  | 99474518  | t | c | 0.8961 | 0.0074  | 0.0017 | 9.71E-06 | 0.5301  | 35257 | LPPR4  |
| rs2241896  | 8  | 41674630  | t | c | 0.6369 | 0.0047  | 0.0011 | 9.99E-06 | 0.1807  | 35243 | ANK1   |

### Atherosclerosis Risk in Communities Study

| af     | oevar_aric | coded_aric | noncoded_aric | beta_aric   | se_aric    | p_aric     | n_aric | maf_aric |
|--------|------------|------------|---------------|-------------|------------|------------|--------|----------|
| 0.4879 | 0.9945     | G          | A             | -0.00183463 | 0.00200732 | 0.36068207 | 7630   | 0.4879   |
| 0.488  | 0.9955     | C          | G             | -0.00183487 | 0.00200629 | 0.36037386 | 7630   | 0.488    |
| 0.5733 | 0.9732     | C          | G             | 0.00319315  | 0.0020569  | 0.12054388 | 7630   | 0.4267   |
| 0.5732 | 0.9729     | A          | G             | 0.00318621  | 0.00205763 | 0.12148582 | 7630   | 0.4268   |
| 0.5128 | 0.9759     | C          | T             | -5.76E-05   | 0.00203077 | 0.97735436 | 7630   | 0.4872   |
| 0.5124 | 0.9753     | G          | A             | -4.98E-05   | 0.00203108 | 0.98043457 | 7630   | 0.4876   |
| 0.5126 | 0.9756     | G          | A             | -5.31E-05   | 0.00203097 | 0.97913034 | 7630   | 0.4874   |
| 0.5123 | 0.9753     | T          | A             | -4.81E-05   | 0.00203109 | 0.98108634 | 7630   | 0.4877   |
| 0.5122 | 0.9752     | C          | T             | -4.64E-05   | 0.00203108 | 0.98176423 | 7630   | 0.4878   |
| 0.5144 | 0.9656     | C          | T             | -8.89E-05   | 0.00203988 | 0.96523633 | 7630   | 0.4856   |
| 0.5143 | 0.9656     | C          | A             | -8.82E-05   | 0.00203976 | 0.96551416 | 7630   | 0.4857   |
| 0.5582 | 0.9978     | T          | C             | -0.0031378  | 0.0020047  | 0.11751214 | 7630   | 0.4418   |
| 0.3568 | 0.9858     | A          | G             | -0.00397774 | 0.00210414 | 0.05869572 | 7630   | 0.3568   |
| 0.5121 | 0.9752     | G          | A             | -4.42E-05   | 0.00203104 | 0.98264733 | 7630   | 0.4879   |
| 0.512  | 0.9752     | G          | A             | -4.26E-05   | 0.002031   | 0.98327579 | 7630   | 0.488    |
| 0.5119 | 0.9752     | C          | G             | -4.00E-05   | 0.00203085 | 0.98427083 | 7630   | 0.4881   |
| 0.5086 | 0.9879     | C          | A             | -0.00043888 | 0.00202089 | 0.82805345 | 7630   | 0.4914   |
| 0.5087 | 0.9881     | A          | T             | -0.00043936 | 0.00202062 | 0.82784477 | 7630   | 0.4913   |
| 0.5112 | 0.9757     | C          | T             | -2.75E-05   | 0.00202968 | 0.98918975 | 7630   | 0.4888   |
| 0.5114 | 0.9754     | C          | T             | -3.22E-05   | 0.00203018 | 0.98734162 | 7630   | 0.4886   |
| 0.5007 | 0.9932     | G          | A             | -2.91E-06   | 0.00201531 | 0.99884963 | 7630   | 0.4993   |
| 0.4811 | 0.9985     | T          | C             | -0.00101356 | 0.0019989  | 0.6120711  | 7630   | 0.4811   |
| 0.4809 | 0.9934     | T          | G             | -0.00105318 | 0.0020046  | 0.59927153 | 7630   | 0.4809   |
| 0.5536 | 0.9997     | A          | G             | -0.0026719  | 0.00200147 | 0.18185367 | 7630   | 0.4464   |
| 0.5166 | 0.8771     | G          | A             | 0.00185897  | 0.00212836 | 0.38237946 | 7630   | 0.4834   |
| 0.6666 | 0.9984     | T          | C             | -0.00504406 | 0.00212636 | 0.01769082 | 7630   | 0.3334   |
| 0.3409 | 0.9395     | A          | G             | -0.00326476 | 0.00218813 | 0.13566875 | 7630   | 0.3409   |
| 0.4512 | 0.9981     | T          | A             | -0.00254969 | 0.00201594 | 0.20592022 | 7630   | 0.4512   |
| 0.4512 | 0.998      | G          | C             | -0.00253295 | 0.00201604 | 0.20893363 | 7630   | 0.4512   |
| 0.4976 | 0.9816     | A          | T             | 0.00023452  | 0.00201663 | 0.90740828 | 7630   | 0.4976   |
| 0.5756 | 0.9997     | T          | C             | -0.0028059  | 0.00201974 | 0.16473219 | 7630   | 0.4244   |
| 0.5753 | 0.9967     | T          | G             | -0.00288453 | 0.00202053 | 0.15337896 | 7630   | 0.4247   |
| 0.5668 | 0.9979     | A          | G             | -0.00259143 | 0.00201473 | 0.19832451 | 7630   | 0.4332   |
| 0.5346 | 0.9718     | C          | G             | -0.00196773 | 0.00203216 | 0.33284865 | 7630   | 0.4654   |
| 0.5772 | 0.9994     | A          | T             | -0.00274235 | 0.00201929 | 0.17440808 | 7630   | 0.4228   |
| 0.567  | 0.9961     | T          | C             | -0.00256224 | 0.00201604 | 0.20372039 | 7630   | 0.433    |
| 0.5767 | 0.9983     | G          | A             | -0.0027566  | 0.00202022 | 0.17237802 | 7630   | 0.4233   |
| 0.4466 | 0.9996     | A          | T             | -0.00209805 | 0.00201716 | 0.29824611 | 7630   | 0.4466   |
| 0.4848 | 0.9977     | T          | C             | 0.00035805  | 0.00200593 | 0.85831437 | 7630   | 0.4848   |
| 0.5762 | 0.9661     | T          | G             | -0.00266527 | 0.00204774 | 0.19303248 | 7630   | 0.4238   |
| 0.4958 | 0.999      | C          | A             | -0.00018765 | 0.00200289 | 0.92534493 | 7630   | 0.4958   |
| 0.4847 | 0.9929     | G          | A             | 0.00030927  | 0.00201038 | 0.87772422 | 7630   | 0.4847   |
| 0.4464 | 0.9984     | T          | G             | -0.00210092 | 0.00201877 | 0.29796941 | 7630   | 0.4464   |

|        |        |   |   |             |            |            |      |        |
|--------|--------|---|---|-------------|------------|------------|------|--------|
| 0.4465 | 0.9989 | G | A | -0.00209888 | 0.0020181  | 0.29828183 | 7630 | 0.4465 |
| 0.4837 | 0.9696 | T | C | -2.58E-05   | 0.00203274 | 0.98988367 | 7630 | 0.4837 |
| 0.4442 | 0.9892 | T | G | -0.00213926 | 0.00203169 | 0.29232119 | 7630 | 0.4442 |
| 0.4866 | 0.9995 | C | G | 0.00036765  | 0.00200258 | 0.85431714 | 7630 | 0.4866 |
| 0.4865 | 0.9998 | A | C | 0.00037253  | 0.00200233 | 0.8523868  | 7630 | 0.4865 |
| 0.5731 | 0.9879 | A | G | -0.00263971 | 0.00202643 | 0.19266374 | 7630 | 0.4269 |
| 0.3587 | 0.9889 | G | C | -0.00271476 | 0.00210413 | 0.19694572 | 7630 | 0.3587 |
| 0.4866 | 0.9991 | T | C | 0.00036118  | 0.00200292 | 0.85687916 | 7630 | 0.4866 |
| 0.4866 | 0.9991 | G | T | 0.00035985  | 0.00200299 | 0.85740336 | 7630 | 0.4866 |
| 0.4865 | 0.9999 | G | A | 0.00037458  | 0.00200223 | 0.85157869 | 7630 | 0.4865 |
| 0.4865 | 0.9999 | G | A | 0.00037366  | 0.00200222 | 0.85193679 | 7630 | 0.4865 |
| 0.3504 | 0.9757 | A | T | -0.00239867 | 0.00213083 | 0.26025124 | 7630 | 0.3504 |
| 0.5765 | 0.9628 | T | C | -0.00252026 | 0.00205112 | 0.21913909 | 7630 | 0.4235 |
| 0.5662 | 0.989  | T | C | -0.00229685 | 0.0020215  | 0.25582692 | 7630 | 0.4338 |
| 0.367  | 0.9975 | T | C | -0.00470226 | 0.00206081 | 0.02250919 | 7630 | 0.367  |
| 0.8766 | 0.9602 | T | G | 0.00949865  | 0.00306533 | 0.00194718 | 7630 | 0.1234 |
| 0.5602 | 0.9858 | A | G | -0.00194817 | 0.00203368 | 0.33803723 | 7630 | 0.4398 |
| 0.8749 | 0.973  | A | C | 0.00925206  | 0.00302879 | 0.0022568  | 7630 | 0.1251 |
| 0.4795 | 0.9875 | G | A | 0.00053336  | 0.00201649 | 0.79137114 | 7630 | 0.4795 |
| 0.4797 | 0.9882 | T | A | 0.00053025  | 0.00201571 | 0.79247952 | 7630 | 0.4797 |
| 0.4738 | 0.9959 | G | A | -0.00256005 | 0.00201271 | 0.20335971 | 7630 | 0.4738 |
| 0.566  | 0.9955 | T | C | -0.0014943  | 0.00201459 | 0.45819596 | 7630 | 0.434  |
| 0.8405 | 0.9736 | G | A | 0.00598268  | 0.00269535 | 0.02644875 | 7630 | 0.1595 |
| 0.3678 | 0.9982 | C | T | -0.00474185 | 0.00205868 | 0.02126491 | 7630 | 0.3678 |
| 0.4701 | 0.9998 | A | T | -0.00212833 | 0.00200796 | 0.28912529 | 7630 | 0.4701 |
| 0.8746 | 0.9763 | A | C | 0.00920232  | 0.00302111 | 0.00232309 | 7630 | 0.1254 |
| 0.4798 | 0.9889 | G | C | 0.00052789  | 0.00201488 | 0.79329864 | 7630 | 0.4798 |
| 0.4796 | 0.9948 | C | G | 0.00062719  | 0.00201003 | 0.75498597 | 7630 | 0.4796 |
| 0.5652 | 0.9967 | T | C | -0.0014528  | 0.00201292 | 0.4704035  | 7630 | 0.4348 |
| 0.3676 | 0.9979 | A | G | -0.00484375 | 0.00205939 | 0.01867719 | 7630 | 0.3676 |
| 0.8624 | 0.8951 | A | G | 0.00868779  | 0.00303747 | 0.00423886 | 7630 | 0.1376 |
| 0.5657 | 0.9975 | C | G | -0.00145724 | 0.00201248 | 0.46895425 | 7630 | 0.4343 |

Cardiovascular Health Study

| af_chs     | oevar_chs  | coded_chs | noncoded_c<br>hs | beta_chs    | se_chs     | p_chs      | n_chs | maf_chs    |
|------------|------------|-----------|------------------|-------------|------------|------------|-------|------------|
| 0.47619073 | 0.93163899 | A         | G                | 0.00688849  | 0.00339263 | 0.04231299 | 3193  | 0.47619073 |
| 0.47615143 | 0.93186249 | G         | C                | 0.00688602  | 0.0033922  | 0.04236097 | 3193  | 0.47615143 |
| 0.43995866 | 0.98017303 | G         | C                | -0.00460375 | 0.00334966 | 0.16932005 | 3193  | 0.43995866 |
| 0.44000266 | 0.98019466 | G         | A                | -0.00460657 | 0.0033496  | 0.16905017 | 3193  | 0.44000266 |
| 0.46460179 | 0.98269811 | T         | C                | 0.00543526  | 0.00334237 | 0.10391326 | 3193  | 0.46460179 |
| 0.46799092 | 1.00475623 | A         | G                | 0.00535525  | 0.00330539 | 0.10519916 | 3193  | 0.46799092 |
| 0.46724225 | 0.99264554 | A         | G                | 0.00538876  | 0.003325   | 0.1050862  | 3193  | 0.46724225 |
| 0.47253868 | 0.98847442 | A         | T                | 0.0052339   | 0.00333005 | 0.11601603 | 3193  | 0.47253868 |
| 0.47552067 | 0.98341614 | T         | C                | 0.00521381  | 0.0033371  | 0.11819953 | 3193  | 0.47552067 |
| 0.45960492 | 0.91913763 | T         | C                | 0.00549199  | 0.00344926 | 0.11133459 | 3193  | 0.45960492 |
| 0.45958284 | 0.91844525 | A         | C                | 0.00549058  | 0.00345039 | 0.11154356 | 3193  | 0.45958284 |
| 0.4140642  | 0.85768652 | C         | T                | 0.00606861  | 0.00360725 | 0.09250298 | 3193  | 0.4140642  |
| 0.34580629 | 0.73440757 | A         | G                | -0.00664051 | 0.00404949 | 0.10103832 | 3193  | 0.34580629 |
| 0.47610085 | 0.98181345 | A         | G                | 0.00517855  | 0.00333915 | 0.1209355  | 3193  | 0.47610085 |
| 0.47706044 | 0.97938435 | A         | G                | 0.00510229  | 0.00334188 | 0.12681833 | 3193  | 0.47706044 |
| 0.47758926 | 0.97805503 | G         | C                | 0.00509845  | 0.00334373 | 0.12731361 | 3193  | 0.47758926 |
| 0.47062026 | 0.90384121 | A         | C                | 0.00558813  | 0.00346506 | 0.10680841 | 3193  | 0.47062026 |
| 0.46966708 | 0.90054547 | T         | A                | 0.00557733  | 0.00347125 | 0.10811526 | 3193  | 0.46966708 |
| 0.47518822 | 0.95985821 | T         | C                | 0.0052924   | 0.0033725  | 0.11658255 | 3193  | 0.47518822 |
| 0.47459395 | 0.96081271 | T         | C                | 0.005273    | 0.00337124 | 0.11779056 | 3193  | 0.47459395 |
| 0.52002114 | 0.95431687 | A         | G                | 0.00592529  | 0.0033536  | 0.07725448 | 3193  | 0.479979   |
| 0.5013705  | 0.99732119 | C         | T                | 0.00657617  | 0.00325919 | 0.04361916 | 3193  | 0.49863    |
| 0.49939712 | 1.01003772 | T         | G                | -0.00670693 | 0.00323948 | 0.03841743 | 3193  | 0.49939712 |
| 0.42033432 | 0.86356124 | G         | A                | 0.00622611  | 0.00359893 | 0.08363193 | 3193  | 0.42033432 |
| 0.48953696 | 0.97817916 | A         | G                | -0.0071575  | 0.00341608 | 0.03614992 | 3193  | 0.48953696 |
| 0.35147087 | 0.74960305 | C         | T                | 0.00556292  | 0.0040051  | 0.16484488 | 3193  | 0.35147087 |
| 0.36293846 | 0.98399398 | A         | G                | -0.00639755 | 0.00345063 | 0.06373542 | 3193  | 0.36293846 |
| 0.52303304 | 0.84457689 | A         | T                | 0.0074032   | 0.00361997 | 0.04084512 | 3193  | 0.476967   |
| 0.52451769 | 0.84425702 | C         | G                | 0.00735993  | 0.0036214  | 0.04211865 | 3193  | 0.475482   |
| 0.502443   | 0.87453154 | T         | A                | 0.00533974  | 0.00351843 | 0.1291033  | 3193  | 0.497557   |
| 0.4226746  | 0.91389175 | C         | T                | 0.00521765  | 0.00350143 | 0.13618504 | 3193  | 0.4226746  |
| 0.40220952 | 0.97376389 | G         | T                | 0.00520125  | 0.00342372 | 0.12871714 | 3193  | 0.40220952 |
| 0.43391575 | 0.92426587 | G         | A                | 0.00545496  | 0.00346878 | 0.11581415 | 3193  | 0.43391575 |
| 0.45653727 | 0.86946078 | G         | C                | 0.00643676  | 0.00356576 | 0.07104975 | 3193  | 0.45653727 |
| 0.39945412 | 0.88399562 | T         | A                | 0.00587369  | 0.00357222 | 0.10012097 | 3193  | 0.39945412 |
| 0.41525321 | 0.98792437 | C         | T                | 0.0053248   | 0.00336926 | 0.11401375 | 3193  | 0.41525321 |
| 0.40445803 | 0.90029984 | A         | G                | 0.00552049  | 0.00354139 | 0.11903271 | 3193  | 0.40445803 |
| 0.47357172 | 0.86093229 | A         | T                | -0.0076699  | 0.00358862 | 0.03257474 | 3193  | 0.47357172 |
| 0.50445725 | 0.96349096 | C         | T                | 0.00636697  | 0.00331902 | 0.0550697  | 3193  | 0.495543   |
| 0.41612606 | 0.97776287 | G         | T                | 0.00546894  | 0.00338701 | 0.10638036 | 3193  | 0.41612606 |
| 0.49081992 | 0.79874005 | A         | C                | 0.00557985  | 0.0036674  | 0.12814182 | 3193  | 0.49081992 |
| 0.50287363 | 0.96630408 | A         | G                | 0.00638104  | 0.00331304 | 0.05409942 | 3193  | 0.497126   |
| 0.52554244 | 0.86140044 | G         | T                | 0.00767844  | 0.00358726 | 0.03231609 | 3193  | 0.474458   |

|            |            |   |   |             |            |            |      |            |
|------------|------------|---|---|-------------|------------|------------|------|------------|
| 0.52554322 | 0.86139719 | A | G | 0.00767829  | 0.00358726 | 0.03231992 | 3193 | 0.474457   |
| 0.50023223 | 0.96879241 | C | T | 0.00647096  | 0.00330849 | 0.05048141 | 3193 | 0.499768   |
| 0.46146774 | 0.90708127 | T | G | -0.00725322 | 0.00351486 | 0.03905719 | 3193 | 0.46146774 |
| 0.48435343 | 0.89305765 | C | G | -0.00641169 | 0.00345436 | 0.06343714 | 3193 | 0.48435343 |
| 0.48516411 | 0.89443313 | A | C | -0.00638951 | 0.00345079 | 0.06408182 | 3193 | 0.48516411 |
| 0.40386893 | 0.99322843 | G | A | 0.00573334  | 0.00340083 | 0.09182257 | 3193 | 0.40386893 |
| 0.38296821 | 0.8195557  | G | C | -0.00611346 | 0.00374023 | 0.10215111 | 3193 | 0.38296821 |
| 0.53625744 | 0.90208384 | C | T | 0.00602395  | 0.00344272 | 0.08015857 | 3193 | 0.463743   |
| 0.4581508  | 0.90751773 | G | T | -0.00590263 | 0.00343653 | 0.08586657 | 3193 | 0.4581508  |
| 0.51939211 | 0.90910282 | A | G | 0.00636452  | 0.00342129 | 0.06284728 | 3193 | 0.480608   |
| 0.51801676 | 0.9105468  | A | G | 0.00639234  | 0.00341783 | 0.06144295 | 3193 | 0.481983   |
| 0.35873974 | 0.82350797 | A | T | -0.00629036 | 0.00378829 | 0.09681871 | 3193 | 0.35873974 |
| 0.40686988 | 0.95479807 | C | T | 0.00555421  | 0.00343211 | 0.10559598 | 3193 | 0.40686988 |
| 0.40867836 | 0.95718608 | C | T | 0.00564112  | 0.0034349  | 0.10052877 | 3193 | 0.40867836 |
| 0.34295161 | 0.7625445  | T | C | -0.00667154 | 0.00404341 | 0.09894737 | 3193 | 0.34295161 |
| 0.11465878 | 1.02855338 | G | T | -0.0089047  | 0.00510546 | 0.08113237 | 3193 | 0.11465878 |
| 0.42177889 | 0.9854606  | G | A | 0.00618952  | 0.00337143 | 0.06637631 | 3193 | 0.42177889 |
| 0.11589821 | 0.94777648 | C | A | -0.00950566 | 0.00528459 | 0.07205815 | 3193 | 0.11589821 |
| 0.47202897 | 0.73894179 | G | A | -0.00432705 | 0.00378431 | 0.25286432 | 3193 | 0.47202897 |
| 0.47203758 | 0.73891842 | T | A | -0.00432702 | 0.00378434 | 0.25287169 | 3193 | 0.47203758 |
| 0.51234028 | 0.96262635 | A | G | 0.00591505  | 0.00339423 | 0.08139019 | 3193 | 0.48766    |
| 0.40722127 | 0.91984761 | C | T | 0.00551321  | 0.00350048 | 0.11525955 | 3193 | 0.40722127 |
| 0.17786439 | 0.72694677 | A | G | -0.00636832 | 0.00525899 | 0.22591838 | 3193 | 0.17786439 |
| 0.34022675 | 0.74826656 | C | T | -0.0068743  | 0.00408413 | 0.09234099 | 3193 | 0.34022675 |
| 0.50601049 | 0.87266629 | T | A | 0.0071088   | 0.00354895 | 0.04516951 | 3193 | 0.49399    |
| 0.11523505 | 0.93153156 | C | A | -0.00955237 | 0.00534274 | 0.07378982 | 3193 | 0.11523505 |
| 0.47204995 | 0.73888869 | G | C | -0.00432702 | 0.00378444 | 0.25288402 | 3193 | 0.47204995 |
| 0.47208988 | 0.73879111 | C | G | -0.00432851 | 0.00378452 | 0.25273098 | 3193 | 0.47208988 |
| 0.41445944 | 0.90096971 | C | T | 0.00571738  | 0.00352198 | 0.10451569 | 3193 | 0.41445944 |
| 0.33333636 | 0.74162621 | A | G | -0.00729095 | 0.00412523 | 0.07716027 | 3193 | 0.33333636 |
| 0.12394159 | 0.81307176 | G | A | -0.0105103  | 0.00554024 | 0.05781687 | 3193 | 0.12394159 |
| 0.40734591 | 0.91841393 | G | C | 0.00552373  | 0.00350138 | 0.11466036 | 3193 | 0.40734591 |
| 0.43618212 | 0.98678838 | G | A | -0.00997384 | 0.00335105 | 0.00291716 | 3193 | 0.43618212 |
| 0.42606389 | 0.98781614 | G | A | -0.00957766 | 0.00335615 | 0.00432044 | 3193 | 0.42606389 |
| 0.50458801 | 0.93410068 | G | A | 0.00616011  | 0.00344202 | 0.07350556 | 3193 | 0.495412   |
| 0.48017444 | 0.99662926 | A | G | -0.0052702  | 0.00335759 | 0.11649936 | 3193 | 0.48017444 |
| 0.50501206 | 0.95617204 | T | C | 0.00602889  | 0.00340763 | 0.07685549 | 3193 | 0.494988   |
| 0.50532524 | 0.88919568 | G | C | 0.00660862  | 0.00351643 | 0.06019612 | 3193 | 0.494675   |
| 0.49609756 | 1.00802829 | A | G | -0.00505888 | 0.00332674 | 0.12834269 | 3193 | 0.49609756 |
| 0.28297714 | 0.76069416 | T | C | -0.01211976 | 0.00424259 | 0.00428081 | 3193 | 0.28297714 |
| 0.50745803 | 0.90132606 | A | G | 0.00634113  | 0.00349897 | 0.06994204 | 3193 | 0.492542   |
| 0.39341325 | 0.97036766 | T | A | 0.00656648  | 0.00340892 | 0.05407159 | 3193 | 0.39341325 |
| 0.50413514 | 0.90046898 | A | G | 0.00611493  | 0.00350442 | 0.08099882 | 3193 | 0.495865   |
| 0.37948309 | 0.93475383 | T | C | -0.00857897 | 0.00355796 | 0.01589985 | 3193 | 0.37948309 |
| 0.38823974 | 0.95621341 | A | G | 0.00667086  | 0.0034426  | 0.05265475 | 3193 | 0.38823974 |
| 0.39333182 | 0.9697676  | G | A | 0.00656451  | 0.00341011 | 0.05422789 | 3193 | 0.39333182 |
| 0.38758268 | 0.99392834 | G | A | 0.00641695  | 0.0033747  | 0.05723811 | 3193 | 0.38758268 |

|            |            |   |   |             |            |            |      |            |
|------------|------------|---|---|-------------|------------|------------|------|------------|
| 0.39341967 | 0.97034506 | G | C | 0.00656557  | 0.00340895 | 0.05410666 | 3193 | 0.39341967 |
| 0.03742452 | 0.1798872  | G | C | -0.01350262 | 0.02471886 | 0.58489552 | 3193 | 0.03742452 |
| 0.39230817 | 0.97415835 | G | A | 0.00655946  | 0.0034045  | 0.05401669 | 3193 | 0.39230817 |
| 0.36855105 | 0.65881478 | C | G | 0.00739739  | 0.0042007  | 0.07823982 | 3193 | 0.36855105 |
| 0.08911697 | 0.57027126 | C | T | -0.01536755 | 0.00764962 | 0.04454455 | 3193 | 0.08911697 |
| 0.34480066 | 0.64922581 | C | T | -0.00307645 | 0.00445638 | 0.48997656 | 3193 | 0.34480066 |



Rotterdam Study II

| af_eplus | oevar_eplus | coded_eplus | noncoded_e |  | beta_eplus  | se_eplus   | p_eplus    | n_eplus | maf_eplus |
|----------|-------------|-------------|------------|--|-------------|------------|------------|---------|-----------|
|          |             |             | plus       |  |             |            |            |         |           |
| 0.465425 | 0.9828      | G           | A          |  | -0.0145255  | 0.00469681 | 0.00200146 | 1642    | 0.465425  |
| 0.465443 | 0.9829      | C           | G          |  | -0.0145092  | 0.00469633 | 0.00202275 | 1642    | 0.465443  |
| 0.583946 | 0.9933      | C           | G          |  | 0.0151418   | 0.00473399 | 0.0013959  | 1642    | 0.416054  |
| 0.583789 | 0.9933      | A           | G          |  | 0.0151214   | 0.00473386 | 0.00141641 | 1642    | 0.416211  |
| 0.482092 | 0.994       | C           | T          |  | -0.01482    | 0.00463816 | 0.00141189 | 1642    | 0.482092  |
| 0.484354 | 0.9996      | G           | A          |  | -0.0150682  | 0.00462101 | 0.00112386 | 1642    | 0.484354  |
| 0.483223 | 0.9961      | G           | A          |  | -0.0149556  | 0.00463135 | 0.00125505 | 1642    | 0.483223  |
| 0.483833 | 0.9985      | T           | A          |  | -0.0150147  | 0.00462604 | 0.00118493 | 1642    | 0.483833  |
| 0.483441 | 0.9989      | C           | T          |  | -0.0149565  | 0.00462706 | 0.00124119 | 1642    | 0.483441  |
| 0.488976 | 0.9781      | C           | T          |  | -0.0152647  | 0.00467531 | 0.00110763 | 1642    | 0.488976  |
| 0.488942 | 0.9779      | C           | A          |  | -0.0152631  | 0.00467574 | 0.00111015 | 1642    | 0.488942  |
| 0.562711 | 0.9727      | T           | C          |  | -0.00452235 | 0.00475321 | 0.34115745 | 1642    | 0.437289  |
| 0.358371 | 0.9563      | A           | G          |  | -0.0167126  | 0.00499561 | 0.00083238 | 1642    | 0.358371  |
| 0.483405 | 0.9987      | G           | A          |  | -0.0149551  | 0.00462743 | 0.00124368 | 1642    | 0.483405  |
| 0.483357 | 0.9985      | G           | A          |  | -0.0149514  | 0.00462796 | 0.00124867 | 1642    | 0.483357  |
| 0.483321 | 0.9983      | C           | G          |  | -0.0149502  | 0.00462836 | 0.00125111 | 1642    | 0.483321  |
| 0.475855 | 0.9559      | C           | A          |  | -0.0149356  | 0.00474763 | 0.00167174 | 1642    | 0.475855  |
| 0.475823 | 0.953       | A           | T          |  | -0.0149587  | 0.00475489 | 0.00167149 | 1642    | 0.475823  |
| 0.482878 | 0.9959      | C           | T          |  | -0.0149226  | 0.00463349 | 0.0012932  | 1642    | 0.482878  |
| 0.482953 | 0.9963      | C           | T          |  | -0.0149292  | 0.00463259 | 0.00128406 | 1642    | 0.482953  |
| 0.469639 | 0.983       | G           | A          |  | -0.0134829  | 0.00469501 | 0.00410598 | 1642    | 0.469639  |
| 0.458942 | 0.9989      | T           | C          |  | -0.0122774  | 0.00467777 | 0.00870369 | 1642    | 0.458942  |
| 0.458943 | 0.9991      | T           | G          |  | -0.0122756  | 0.00467739 | 0.00870807 | 1642    | 0.458943  |
| 0.556484 | 0.9707      | A           | G          |  | -0.00409128 | 0.0047576  | 0.38958305 | 1642    | 0.443516  |
| 0.530285 | 0.9929      | G           | A          |  | 0.00485961  | 0.0047631  | 0.30738464 | 1642    | 0.469715  |
| 0.653729 | 0.9999      | T           | C          |  | -0.00665627 | 0.00485232 | 0.16999811 | 1642    | 0.346271  |
| 0.336983 | 0.9215      | A           | G          |  | -0.0175588  | 0.00518962 | 0.00072583 | 1642    | 0.336983  |
| 0.455511 | 0.9723      | T           | A          |  | -0.0118925  | 0.00475131 | 0.01234482 | 1642    | 0.455511  |
| 0.455473 | 0.9725      | G           | C          |  | -0.0118913  | 0.0047507  | 0.01234259 | 1642    | 0.455473  |
| 0.47866  | 0.9857      | A           | T          |  | -0.0148727  | 0.00466037 | 0.00143101 | 1642    | 0.47866   |
| 0.57066  | 0.9946      | T           | C          |  | -0.00465588 | 0.00470929 | 0.32260774 | 1642    | 0.42934   |
| 0.568938 | 0.9986      | T           | G          |  | -0.00451543 | 0.00469878 | 0.3363367  | 1642    | 0.431062  |
| 0.558149 | 0.9948      | A           | G          |  | -0.00608508 | 0.00467028 | 0.19244106 | 1642    | 0.441851  |
| 0.530856 | 0.9599      | C           | G          |  | -0.00537446 | 0.00473921 | 0.25658122 | 1642    | 0.469144  |
| 0.572089 | 0.9977      | A           | T          |  | -0.00477581 | 0.00470359 | 0.30971986 | 1642    | 0.427911  |
| 0.556438 | 0.9993      | T           | C          |  | -0.0059306  | 0.00465881 | 0.20285909 | 1642    | 0.443562  |
| 0.572059 | 0.9977      | G           | A          |  | -0.00476572 | 0.00470365 | 0.31074657 | 1642    | 0.427941  |
| 0.450091 | 0.968       | A           | T          |  | -0.0114994  | 0.0047719  | 0.01598912 | 1642    | 0.450091  |
| 0.459536 | 0.9859      | T           | C          |  | -0.0125143  | 0.00470698 | 0.00787396 | 1642    | 0.459536  |
| 0.556497 | 0.9988      | T           | G          |  | -0.00591184 | 0.00466016 | 0.20442294 | 1642    | 0.443503  |
| 0.471586 | 0.931       | C           | A          |  | -0.0149792  | 0.00481525 | 0.00188288 | 1642    | 0.471586  |
| 0.459504 | 0.9865      | G           | A          |  | -0.0125027  | 0.0047056  | 0.00791348 | 1642    | 0.459504  |
| 0.450315 | 0.9673      | T           | G          |  | -0.0114986  | 0.00477362 | 0.01603456 | 1642    | 0.450315  |

|          |        |   |   |             |            |            |      |          |
|----------|--------|---|---|-------------|------------|------------|------|----------|
| 0.450278 | 0.9674 | G | A | -0.0114997  | 0.00477335 | 0.01601861 | 1642 | 0.450278 |
| 0.458972 | 0.9979 | T | C | -0.0122962  | 0.00468025 | 0.00863719 | 1642 | 0.458972 |
| 0.450465 | 0.9667 | T | G | -0.0114816  | 0.00477528 | 0.0162291  | 1642 | 0.450465 |
| 0.465009 | 0.9917 | C | G | -0.0131286  | 0.00468252 | 0.00507696 | 1642 | 0.465009 |
| 0.464947 | 0.992  | A | C | -0.0131195  | 0.00468221 | 0.00510461 | 1642 | 0.464947 |
| 0.571009 | 0.9978 | A | G | -0.00423072 | 0.00471136 | 0.36896153 | 1642 | 0.428991 |
| 0.363925 | 0.9618 | G | C | -0.014111   | 0.00498268 | 0.00465069 | 1642 | 0.363925 |
| 0.465145 | 0.9912 | T | C | -0.0131493  | 0.00468318 | 0.00501437 | 1642 | 0.465145 |
| 0.465254 | 0.9908 | G | T | -0.0131668  | 0.00468369 | 0.00496144 | 1642 | 0.465254 |
| 0.464897 | 0.9922 | G | A | -0.0131114  | 0.00468196 | 0.00512963 | 1642 | 0.464897 |
| 0.464858 | 0.9923 | G | A | -0.013106   | 0.00468177 | 0.00514606 | 1642 | 0.464858 |
| 0.351306 | 0.9533 | A | T | -0.014129   | 0.00504732 | 0.00514723 | 1642 | 0.351306 |
| 0.556976 | 0.9967 | T | C | -0.00598639 | 0.00466715 | 0.19944825 | 1642 | 0.443024 |
| 0.558446 | 0.9965 | T | C | -0.00579713 | 0.00467405 | 0.21469969 | 1642 | 0.441554 |
| 0.369241 | 0.9994 | T | C | 0.00606699  | 0.00477462 | 0.20367981 | 1642 | 0.369241 |
| 0.872412 | 1      | T | G | -0.00220322 | 0.00704311 | 0.75427654 | 1642 | 0.127588 |
| 0.545683 | 0.999  | A | G | -0.00620274 | 0.00466538 | 0.1835257  | 1642 | 0.454317 |
| 0.872411 | 1      | A | C | -0.0022026  | 0.0070431  | 0.75434293 | 1642 | 0.127589 |
| 0.459954 | 0.9132 | G | A | -0.015191   | 0.00487398 | 0.00184532 | 1642 | 0.459954 |
| 0.459933 | 0.9118 | T | A | -0.0152026  | 0.00487797 | 0.00184645 | 1642 | 0.459933 |
| 0.461189 | 0.9992 | G | A | -0.0116514  | 0.00468266 | 0.01286864 | 1642 | 0.461189 |
| 0.558388 | 0.9898 | T | C | -0.0055904  | 0.00469955 | 0.23403483 | 1642 | 0.441612 |
| 0.83711  | 0.9999 | G | A | 0.00311825  | 0.00626805 | 0.61864756 | 1642 | 0.16289  |
| 0.369112 | 0.9998 | C | T | 0.00598818  | 0.00477357 | 0.2095113  | 1642 | 0.369112 |
| 0.46493  | 0.9967 | A | T | -0.0118836  | 0.00467944 | 0.01112989 | 1642 | 0.46493  |
| 0.87241  | 1      | A | C | -0.00220252 | 0.00704308 | 0.75435155 | 1642 | 0.12759  |
| 0.459921 | 0.911  | G | C | -0.0152138  | 0.00488016 | 0.00184084 | 1642 | 0.459921 |
| 0.45983  | 0.9043 | C | G | -0.0152518  | 0.00489902 | 0.00186741 | 1642 | 0.45983  |
| 0.558332 | 0.9894 | T | C | -0.00552529 | 0.00469984 | 0.23955342 | 1642 | 0.441668 |
| 0.368538 | 0.997  | A | G | 0.00593791  | 0.00478094 | 0.21406642 | 1642 | 0.368538 |
| 0.862253 | 0.9224 | A | G | -0.00135591 | 0.00708063 | 0.84804708 | 1642 | 0.137747 |
| 0.558367 | 0.9897 | C | G | -0.00556553 | 0.00469972 | 0.23613843 | 1642 | 0.441633 |
| 0.418647 | 0.9999 | G | A | 0.00404727  | 0.0048044  | 0.399323   | 1642 | 0.418647 |
| 0.419305 | 1      | G | A | 0.00415108  | 0.00480224 | 0.38713081 | 1642 | 0.419305 |
| 0.467556 | 0.9906 | A | G | -0.01103    | 0.00470517 | 0.01909341 | 1642 | 0.467556 |
| 0.461122 | 0.9995 | A | G | -0.0116321  | 0.00468196 | 0.01300507 | 1642 | 0.461122 |
| 0.464256 | 0.9946 | C | T | -0.0115853  | 0.00468894 | 0.01351161 | 1642 | 0.464256 |
| 0.464661 | 0.9984 | C | G | -0.0118743  | 0.00467568 | 0.01112838 | 1642 | 0.464661 |
| 0.4752   | 0.9962 | A | G | -0.00977621 | 0.00467291 | 0.03643988 | 1642 | 0.4752   |
| 0.75216  | 0.9971 | C | T | 0.0138221   | 0.00523834 | 0.00835302 | 1642 | 0.24784  |
| 0.464589 | 0.9989 | G | A | -0.0118709  | 0.00467452 | 0.0111312  | 1642 | 0.464589 |
| 0.416947 | 0.9971 | T | A | 0.00455732  | 0.00474609 | 0.3367152  | 1642 | 0.416947 |
| 0.463615 | 0.9791 | G | A | -0.0120559  | 0.00472348 | 0.01073027 | 1642 | 0.463615 |
| 0.593284 | 0.9939 | C | T | 0.00897128  | 0.00475543 | 0.05920557 | 1642 | 0.406716 |
| 0.583497 | 0.9934 | G | A | -0.00503299 | 0.00475273 | 0.28940226 | 1642 | 0.416503 |
| 0.417108 | 0.9962 | G | A | 0.00457507  | 0.00474759 | 0.3349895  | 1642 | 0.417108 |
| 0.416744 | 0.9981 | G | A | 0.00453523  | 0.00474416 | 0.33886542 | 1642 | 0.416744 |

|          |        |   |   |             |            |            |      |          |
|----------|--------|---|---|-------------|------------|------------|------|----------|
| 0.416987 | 0.9968 | G | C | 0.00456153  | 0.00474646 | 0.33630586 | 1642 | 0.416987 |
| 0.967328 | 0.8988 | C | G | 0.0101079   | 0.0140318  | 0.47107084 | 1642 | 0.032672 |
| 0.416772 | 0.998  | G | A | 0.00453922  | 0.00474445 | 0.3384697  | 1642 | 0.416772 |
| 0.607156 | 0.8204 | G | C | -0.00289013 | 0.00524028 | 0.58106319 | 1642 | 0.392844 |
| 0.892022 | 0.9696 | T | C | -0.00376301 | 0.00768726 | 0.62427979 | 1642 | 0.107978 |
| 0.362713 | 0.8209 | C | T | 0.00105613  | 0.00537832 | 0.84422909 | 1642 | 0.362713 |

**Family Heart Study**

| af_famhs | oevar_famhs | coded_famhs | uncoded_famhs | beta_famhs | se_famhs | p_famhs    | n_famhs | maf_famhs |
|----------|-------------|-------------|---------------|------------|----------|------------|---------|-----------|
| 0.5144   | 0.9627      | A           | G             | 0.006716   | 0.004168 | 0.10736016 | 1736    | 0.4856    |
| 0.4856   | 0.9632      | C           | G             | -0.0067    | 0.004168 | 0.10820111 | 1736    | 0.4856    |
| 0.5798   | 0.9946      | C           | G             | 0.007404   | 0.004133 | 0.07347037 | 1736    | 0.4202    |
| 0.5798   | 0.995       | A           | G             | 0.007415   | 0.004132 | 0.07296254 | 1736    | 0.4202    |
| 0.5244   | 0.9897      | C           | T             | -0.00803   | 0.004109 | 0.05101198 | 1736    | 0.4756    |
| 0.4708   | 0.9992      | A           | G             | 0.00798    | 0.004099 | 0.05178223 | 1736    | 0.4708    |
| 0.4737   | 0.9914      | A           | G             | 0.008021   | 0.004108 | 0.05112133 | 1736    | 0.4737    |
| 0.4733   | 0.9967      | A           | T             | 0.007914   | 0.004095 | 0.05351406 | 1736    | 0.4733    |
| 0.526    | 0.9988      | C           | T             | -0.00788   | 0.004089 | 0.05422653 | 1736    | 0.474     |
| 0.5357   | 0.9625      | C           | T             | -0.00779   | 0.004193 | 0.06338047 | 1736    | 0.4643    |
| 0.4643   | 0.9622      | A           | C             | 0.007795   | 0.004194 | 0.06328012 | 1736    | 0.4643    |
| 0.4399   | 0.9899      | C           | T             | 0.01009    | 0.004136 | 0.01485334 | 1736    | 0.4399    |
| 0.3523   | 0.995       | A           | G             | -0.0096    | 0.004234 | 0.02349133 | 1736    | 0.3523    |
| 0.4741   | 0.9983      | A           | G             | 0.007884   | 0.00409  | 0.05411029 | 1736    | 0.4741    |
| 0.4741   | 0.9978      | A           | G             | 0.007887   | 0.004091 | 0.05408672 | 1736    | 0.4741    |
| 0.5258   | 0.9976      | C           | G             | -0.00789   | 0.004091 | 0.05404816 | 1736    | 0.4742    |
| 0.4837   | 0.9652      | A           | C             | 0.007377   | 0.004152 | 0.07581954 | 1736    | 0.4837    |
| 0.5163   | 0.964       | A           | T             | -0.00739   | 0.004154 | 0.07564577 | 1736    | 0.4837    |
| 0.5246   | 0.9909      | C           | T             | -0.00795   | 0.004105 | 0.0529997  | 1736    | 0.4754    |
| 0.5248   | 0.9921      | C           | T             | -0.00794   | 0.004103 | 0.05314592 | 1736    | 0.4752    |
| 0.4945   | 0.9742      | A           | G             | 0.007049   | 0.004121 | 0.08742494 | 1736    | 0.4945    |
| 0.5177   | 0.9978      | C           | T             | 0.005345   | 0.004087 | 0.1911306  | 1736    | 0.4823    |
| 0.5173   | 0.9977      | G           | T             | 0.005314   | 0.004088 | 0.19383488 | 1736    | 0.4827    |
| 0.5545   | 0.9907      | A           | G             | -0.01018   | 0.004153 | 0.01431974 | 1736    | 0.4455    |
| 0.4909   | 0.996       | A           | G             | -0.00367   | 0.004133 | 0.37461227 | 1736    | 0.4909    |
| 0.3295   | 0.9994      | C           | T             | 0.000352   | 0.004169 | 0.93264816 | 1736    | 0.3295    |
| 0.3462   | 0.9975      | A           | G             | -0.01048   | 0.004258 | 0.01394803 | 1736    | 0.3462    |
| 0.5521   | 0.9923      | A           | T             | 0.007497   | 0.004136 | 0.07009121 | 1736    | 0.4479    |
| 0.5521   | 0.9926      | C           | G             | 0.00749    | 0.004135 | 0.07032631 | 1736    | 0.4479    |
| 0.518    | 0.9771      | A           | T             | -0.00805   | 0.004133 | 0.05173598 | 1736    | 0.482     |
| 0.4184   | 0.9983      | C           | T             | 0.008942   | 0.004093 | 0.02908529 | 1736    | 0.4184    |
| 0.4183   | 0.9988      | G           | T             | 0.008923   | 0.004092 | 0.02942418 | 1736    | 0.4183    |
| 0.5708   | 0.999       | A           | G             | -0.00814   | 0.004106 | 0.04779036 | 1736    | 0.4292    |
| 0.5346   | 0.9795      | C           | G             | -0.00896   | 0.004158 | 0.03128112 | 1736    | 0.4654    |
| 0.5818   | 0.9968      | A           | T             | -0.00917   | 0.004108 | 0.02581541 | 1736    | 0.4182    |
| 0.4292   | 0.9996      | C           | T             | 0.008114   | 0.004106 | 0.04836752 | 1736    | 0.4292    |
| 0.4182   | 0.9972      | A           | G             | 0.009152   | 0.004107 | 0.02605562 | 1736    | 0.4182    |
| 0.4439   | 0.9912      | A           | T             | -0.00767   | 0.004166 | 0.06591506 | 1736    | 0.4439    |
| 0.5045   | 0.9947      | C           | T             | 0.006845   | 0.004088 | 0.09430636 | 1736    | 0.4955    |
| 0.429    | 0.9987      | G           | T             | 0.008179   | 0.004111 | 0.0468475  | 1736    | 0.429     |
| 0.4912   | 0.9207      | A           | C             | 0.00777    | 0.004257 | 0.06818866 | 1736    | 0.4912    |
| 0.5036   | 0.9937      | A           | G             | 0.007157   | 0.004084 | 0.07996042 | 1736    | 0.4964    |
| 0.5561   | 0.9931      | G           | T             | 0.007499   | 0.004157 | 0.07150495 | 1736    | 0.4439    |
| 0.5562   | 0.9935      | A           | G             | 0.007481   | 0.004157 | 0.07219413 | 1736    | 0.4438    |

|        |        |   |   |          |          |            |      |        |
|--------|--------|---|---|----------|----------|------------|------|--------|
| 0.5183 | 0.9988 | C | T | 0.005405 | 0.004084 | 0.18598291 | 1736 | 0.4817 |
| 0.5559 | 0.9919 | G | T | 0.007591 | 0.004156 | 0.06802409 | 1736 | 0.4441 |
| 0.4967 | 0.9937 | C | G | -0.00693 | 0.004083 | 0.08969196 | 1736 | 0.4967 |
| 0.4966 | 0.9941 | A | C | -0.00693 | 0.004082 | 0.08974031 | 1736 | 0.4966 |
| 0.5834 | 0.9968 | A | G | -0.00868 | 0.004094 | 0.03411268 | 1736 | 0.4166 |
| 0.6441 | 0.9949 | C | G | 0.01053  | 0.004256 | 0.01344365 | 1736 | 0.3559 |
| 0.5031 | 0.9923 | C | T | 0.006938 | 0.004085 | 0.08968342 | 1736 | 0.4969 |
| 0.497  | 0.992  | G | T | -0.00694 | 0.004086 | 0.08966676 | 1736 | 0.497  |
| 0.5035 | 0.9944 | A | G | 0.006928 | 0.004081 | 0.08985034 | 1736 | 0.4965 |
| 0.5036 | 0.995  | A | G | 0.006926 | 0.00408  | 0.08984471 | 1736 | 0.4964 |
| 0.3504 | 0.9739 | A | T | -0.01078 | 0.004311 | 0.01255035 | 1736 | 0.3504 |
| 0.428  | 0.9925 | C | T | 0.008047 | 0.004121 | 0.05106787 | 1736 | 0.428  |
| 0.4278 | 0.995  | C | T | 0.007852 | 0.004106 | 0.05603583 | 1736 | 0.4278 |
| 0.6097 | 0.9989 | C | T | 0.003148 | 0.004133 | 0.4462965  | 1736 | 0.3903 |
| 0.1268 | 1      | G | T | -0.00717 | 0.006042 | 0.23524773 | 1736 | 0.1268 |
| 0.5629 | 0.9986 | A | G | -0.00814 | 0.004115 | 0.04819188 | 1736 | 0.4371 |
| 0.8732 | 1      | A | C | 0.007175 | 0.006042 | 0.23524773 | 1736 | 0.1268 |
| 0.497  | 0.9359 | A | G | 0.007969 | 0.004209 | 0.05856344 | 1736 | 0.497  |
| 0.4971 | 0.9334 | A | T | 0.007998 | 0.004215 | 0.05802156 | 1736 | 0.4971 |
| 0.5344 | 0.9983 | A | G | 0.00575  | 0.004102 | 0.16123042 | 1736 | 0.4656 |
| 0.4313 | 0.9894 | C | T | 0.007726 | 0.004104 | 0.05997402 | 1736 | 0.4313 |
| 0.1673 | 0.9998 | A | G | -0.00743 | 0.005495 | 0.17655057 | 1736 | 0.1673 |
| 0.3906 | 0.9992 | C | T | -0.00314 | 0.004131 | 0.44696475 | 1736 | 0.3906 |
| 0.4702 | 0.9948 | A | T | -0.00665 | 0.004103 | 0.10553328 | 1736 | 0.4702 |
| 0.8732 | 1      | A | C | 0.007175 | 0.006042 | 0.23526788 | 1736 | 0.1268 |
| 0.4981 | 0.9173 | C | G | 0.008188 | 0.004254 | 0.05447115 | 1736 | 0.4981 |
| 0.5011 | 0.905  | C | G | -0.00834 | 0.004284 | 0.05178666 | 1736 | 0.4989 |
| 0.4319 | 0.9887 | C | T | 0.007678 | 0.004103 | 0.06154363 | 1736 | 0.4319 |
| 0.387  | 0.9955 | A | G | -0.00257 | 0.004152 | 0.53600811 | 1736 | 0.387  |
| 0.8627 | 0.924  | A | G | 0.004546 | 0.006058 | 0.45314912 | 1736 | 0.1373 |
| 0.5683 | 0.9897 | C | G | -0.00771 | 0.004102 | 0.06047336 | 1736 | 0.4317 |
| 0.5808 | 0.9997 | A | G | 0.004295 | 0.004122 | 0.29764094 | 1736 | 0.4192 |
| 0.5801 | 0.9997 | A | G | 0.004789 | 0.004119 | 0.24517144 | 1736 | 0.4199 |
| 0.4725 | 0.9907 | A | G | -0.00676 | 0.004104 | 0.09992396 | 1736 | 0.4725 |
| 0.4657 | 0.9978 | A | G | -0.00581 | 0.004105 | 0.15745608 | 1736 | 0.4657 |
| 0.475  | 0.9918 | C | T | -0.00632 | 0.004098 | 0.12358667 | 1736 | 0.475  |
| 0.469  | 0.9974 | C | G | -0.00653 | 0.004105 | 0.11185839 | 1736 | 0.469  |
| 0.4828 | 0.995  | A | G | -0.00616 | 0.00406  | 0.1296977  | 1736 | 0.4828 |
| 0.7455 | 0.9996 | C | T | 0.007147 | 0.004684 | 0.12732665 | 1736 | 0.2545 |
| 0.5315 | 0.9994 | A | G | 0.00647  | 0.004105 | 0.11518703 | 1736 | 0.4685 |
| 0.5957 | 0.9954 | A | T | -0.00671 | 0.004155 | 0.10672656 | 1736 | 0.4043 |
| 0.5302 | 0.9833 | A | G | 0.006446 | 0.004118 | 0.1177556  | 1736 | 0.4698 |
| 0.6026 | 0.9949 | C | T | -0.00425 | 0.004146 | 0.30546344 | 1736 | 0.3974 |
| 0.4029 | 0.9923 | A | G | 0.006771 | 0.004169 | 0.10456591 | 1736 | 0.4029 |
| 0.5957 | 0.9946 | A | G | -0.00669 | 0.004157 | 0.10767824 | 1736 | 0.4043 |
| 0.5999 | 0.9993 | A | G | -0.0076  | 0.004158 | 0.06785587 | 1736 | 0.4001 |
| 0.5957 | 0.9953 | C | G | -0.0067  | 0.004155 | 0.10688339 | 1736 | 0.4043 |

|        |        |   |   |          |          |            |      |        |
|--------|--------|---|---|----------|----------|------------|------|--------|
| 0.9647 | 0.9462 | C | G | 0.01668  | 0.01195  | 0.16286949 | 1736 | 0.0353 |
| 0.5958 | 0.9954 | A | G | -0.00673 | 0.004155 | 0.10573157 | 1736 | 0.4042 |
| 0.4037 | 0.8171 | C | G | 0.005112 | 0.005397 | 0.34377563 | 1736 | 0.4037 |
| 0.1023 | 0.9672 | C | T | -0.00649 | 0.006674 | 0.33064496 | 1736 | 0.1023 |
| 0.3678 | 0.924  | C | T | -0.00429 | 0.004218 | 0.30901759 | 1736 | 0.3678 |

Framingham Heart Study

| af_framhs2 | oevar_framhs2 | coded_framhs2 | noncoded_framhs2 | beta_framhs2 | se_framhs2  | p_framhs2  | n_framhs2 | af_genoa |
|------------|---------------|---------------|------------------|--------------|-------------|------------|-----------|----------|
| 0.466703   | 0.997683      | A             | G                | 0.004905069  | 0.002858255 | 0.0861426  | 3549      | 0.4863   |
| 0.466639   | 0.998217      | G             | C                | 0.004897496  | 0.002857536 | 0.08654938 | 3549      | 0.4873   |
| 0.455599   | 0.920944      | G             | C                | -0.003855664 | 0.002989724 | 0.19717613 | 3549      | 0.5697   |
| 0.455712   | 0.920072      | G             | A                | -0.003835981 | 0.002990884 | 0.19964704 | 3549      | 0.5698   |
| 0.449397   | 0.958738      | T             | C                | 0.004396344  | 0.002918468 | 0.13196766 | 3549      | 0.5107   |
| 0.4495     | 0.958574      | A             | G                | 0.004404341  | 0.00291861  | 0.13128484 | 3549      | 0.5105   |
| 0.449449   | 0.95865       | A             | G                | 0.004400584  | 0.002918543 | 0.13160533 | 3549      | 0.5107   |
| 0.449534   | 0.958527      | A             | T                | 0.004407311  | 0.002918645 | 0.13102973 | 3549      | 0.5104   |
| 0.449656   | 0.958372      | T             | C                | 0.004415748  | 0.00291875  | 0.13030751 | 3549      | 0.5102   |
| 0.448106   | 0.95202       | T             | C                | 0.004483664  | 0.002929153 | 0.12584272 | 3549      | 0.5121   |
| 0.448141   | 0.952006      | A             | C                | 0.004486314  | 0.002929145 | 0.12561813 | 3549      | 0.512    |
| 0.411342   | 0.998398      | C             | T                | 0.005979733  | 0.0029383   | 0.04184087 | 3549      | 0.5532   |
| 0.377222   | 0.993649      | A             | G                | -0.002344397 | 0.002978229 | 0.43117752 | 3549      | 0.3681   |
| 0.449708   | 0.958314      | A             | G                | 0.004419984  | 0.002918792 | 0.12994473 | 3549      | 0.5101   |
| 0.449828   | 0.958199      | A             | G                | 0.00442874   | 0.002918843 | 0.12919274 | 3549      | 0.51     |
| 0.44988    | 0.958149      | G             | C                | 0.004432532  | 0.002918868 | 0.12886845 | 3549      | 0.5099   |
| 0.4535     | 0.977938      | A             | C                | 0.004029132  | 0.002895102 | 0.16401125 | 3549      | 0.5067   |
| 0.453431   | 0.978199      | T             | A                | 0.00402496   | 0.002894803 | 0.16440466 | 3549      | 0.5069   |
| 0.450361   | 0.957942      | T             | C                | 0.004465039  | 0.00291874  | 0.12607042 | 3549      | 0.5091   |
| 0.450241   | 0.957956      | T             | C                | 0.004456452  | 0.002918827 | 0.12681181 | 3549      | 0.5093   |
| 0.46108    | 0.981933      | A             | G                | 0.004518751  | 0.002886832 | 0.11751317 | 3549      | 0.4986   |
| 0.470976   | 0.991977      | C             | T                | 0.003865274  | 0.002866203 | 0.17747534 | 3549      | 0.4829   |
| 0.471348   | 0.988808      | G             | T                | 0.003902746  | 0.002870874 | 0.17401106 | 3549      | 0.4825   |
| 0.415136   | 0.999605      | G             | A                | 0.005870188  | 0.002929993 | 0.0451256  | 3549      | 0.5497   |
| 0.450191   | 0.069315      | A             | G                | -0.012246108 | 0.010964361 | 0.26403654 | 3549      | 0.5258   |
| 0.333296   | 0.963527      | C             | T                | 0.010622616  | 0.003105571 | 0.00062505 | 3549      | 0.6339   |
| 0.35709    | 0.938903      | A             | G                | -0.003034314 | 0.003097915 | 0.32734796 | 3549      | 0.3565   |
| 0.530102   | 1.00501       | A             | T                | 0.003550696  | 0.002892502 | 0.21961519 | 3549      | 0.4469   |
| 0.530113   | 1.005015      | C             | G                | 0.003551996  | 0.002892446 | 0.21943748 | 3549      | 0.447    |
| 0.466229   | 0.970623      | T             | A                | 0.003828443  | 0.002894915 | 0.18601111 | 3549      | 0.5014   |
| 0.388888   | 0.998091      | C             | T                | 0.00690759   | 0.002963121 | 0.01974348 | 3549      | 0.5654   |
| 0.389781   | 0.992495      | G             | T                | 0.006906015  | 0.002971304 | 0.02011277 | 3549      | 0.5642   |
| 0.39697    | 1.003092      | G             | A                | 0.00706545   | 0.002953205 | 0.01673547 | 3549      | 0.5577   |
| 0.436893   | 0.972533      | G             | C                | 0.006670763  | 0.002967709 | 0.0245901  | 3549      | 0.5382   |
| 0.387628   | 0.999586      | T             | A                | 0.006645419  | 0.002960919 | 0.02480816 | 3549      | 0.5659   |
| 0.398066   | 0.997607      | C             | T                | 0.006966644  | 0.00295976  | 0.01858326 | 3549      | 0.5575   |
| 0.387718   | 0.999754      | A             | G                | 0.006686441  | 0.002960233 | 0.02389862 | 3549      | 0.566    |
| 0.533653   | 1.004195      | T             | A                | 0.003438015  | 0.002893469 | 0.2347553  | 3549      | 0.4432   |
| 0.522836   | 0.994388      | T             | C                | -0.003628264 | 0.002866581 | 0.20561648 | 3549      | 0.4898   |
| 0.392538   | 0.963575      | G             | T                | 0.00689074   | 0.003025975 | 0.02277449 | 3549      | 0.5674   |
| 0.468581   | 0.994921      | A             | C                | 0.003374079  | 0.002866863 | 0.23922597 | 3549      | 0.5001   |
| 0.528497   | 0.977801      | G             | A                | -0.003882686 | 0.002887983 | 0.17880996 | 3549      | 0.4895   |
| 0.534252   | 0.999805      | G             | T                | 0.003515687  | 0.002901158 | 0.22558053 | 3549      | 0.4432   |
| 0.465827   | 1.000331      | G             | A                | -0.003505773 | 0.002900221 | 0.22674154 | 3549      | 0.4432   |
| 0.471174   | 0.985317      | C             | T                | 0.003863648  | 0.002876423 | 0.17920309 | 3549      | 0.4865   |
| 0.464681   | 0.996104      | T             | G                | -0.003615923 | 0.002906528 | 0.21347392 | 3549      | 0.4431   |
| 0.477462   | 0.995308      | G             | C                | 0.00390356   | 0.002864428 | 0.17295464 | 3549      | 0.491    |
| 0.477488   | 0.995764      | C             | A                | 0.003902902  | 0.002863872 | 0.17294367 | 3549      | 0.491    |
| 0.396824   | 0.984211      | G             | A                | 0.006277096  | 0.002979029 | 0.03510938 | 3549      | 0.5632   |
| 0.381607   | 0.987415      | G             | C                | -0.002507419 | 0.002980842 | 0.40024826 | 3549      | 0.3724   |

|          |          |   |   |              |             |            |      |        |
|----------|----------|---|---|--------------|-------------|------------|------|--------|
| 0.522677 | 0.993528 | T | C | -0.003904727 | 0.002866637 | 0.1731574  | 3549 | 0.4909 |
| 0.477272 | 0.993152 | T | G | 0.003903843  | 0.002867085 | 0.17332199 | 3549 | 0.4908 |
| 0.522461 | 0.996781 | G | A | -0.003901233 | 0.002862587 | 0.17293461 | 3549 | 0.491  |
| 0.522339 | 0.996895 | G | A | -0.003888573 | 0.00286269  | 0.17434844 | 3549 | 0.491  |
| 0.366731 | 0.978936 | A | T | -0.002900952 | 0.003021388 | 0.33698541 | 3549 | 0.3682 |
| 0.392023 | 0.959906 | C | T | 0.006419964  | 0.003029127 | 0.03405578 | 3549 | 0.5672 |
| 0.402068 | 0.989816 | C | T | 0.006120332  | 0.002965435 | 0.0390281  | 3549 | 0.5569 |
| 0.36449  | 0.9292   | T | C | -0.011029536 | 0.003062245 | 0.00031604 | 3549 | 0.3423 |
| 0.123755 | 0.863486 | G | T | -0.003003164 | 0.004597228 | 0.51359159 | 3549 | 0.8529 |
| 0.405376 | 0.984303 | G | A | 0.007507584  | 0.002966938 | 0.01139278 | 3549 | 0.5534 |
| 0.123838 | 0.861833 | C | A | -0.003014529 | 0.004600135 | 0.51226612 | 3549 | 0.8518 |
| 0.509436 | 0.983425 | G | A | -0.00374517  | 0.002876468 | 0.1929154  | 3549 | 0.4876 |
| 0.509488 | 0.983702 | T | A | -0.003741171 | 0.002876137 | 0.1933398  | 3549 | 0.4877 |
| 0.507096 | 0.997761 | A | G | 0.004436798  | 0.002882515 | 0.12375292 | 3549 | 0.4626 |
| 0.400548 | 1.002592 | C | T | 0.005783124  | 0.002945232 | 0.04958177 | 3549 | 0.5567 |
| 0.176637 | 0.997971 | A | G | -0.004928936 | 0.003771491 | 0.19124899 | 3549 | 0.8327 |
| 0.364267 | 0.93116  | C | T | -0.010928015 | 0.003058832 | 0.00035344 | 3549 | 0.3423 |
| 0.506264 | 1.001894 | T | A | 0.003968222  | 0.002874868 | 0.1674898  | 3549 | 0.4595 |
| 0.124512 | 0.850915 | C | A | -0.003096821 | 0.004617825 | 0.50246056 | 3549 | 0.851  |
| 0.509521 | 0.983883 | G | C | -0.003739164 | 0.002875919 | 0.19354499 | 3549 | 0.488  |
| 0.50953  | 0.985255 | C | G | -0.003707415 | 0.002874341 | 0.19710919 | 3549 | 0.489  |
| 0.401086 | 1.004736 | C | T | 0.005723606  | 0.00294179  | 0.05170034 | 3549 | 0.5553 |
| 0.362017 | 0.921125 | A | G | -0.010980243 | 0.003082647 | 0.00036811 | 3549 | 0.3423 |
| 0.135212 | 0.780571 | G | A | -0.00338876  | 0.004652765 | 0.46641004 | 3549 | 0.841  |
| 0.400821 | 1.003897 | G | C | 0.00574951   | 0.002943177 | 0.05075987 | 3549 | 0.5558 |
| 0.418933 | 1.013299 | G | A | -0.007354205 | 0.002870295 | 0.01040182 | 3549 | 0.4057 |
| 0.424478 | 1.015437 | G | A | -0.007615966 | 0.002857745 | 0.00769824 | 3549 | 0.4022 |
| 0.50123  | 0.991152 | G | A | 0.004433182  | 0.002886716 | 0.12460745 | 3549 | 0.4632 |
| 0.497866 | 0.966175 | G | A | 0.004490948  | 0.002929679 | 0.12529689 | 3549 | 0.4725 |
| 0.502147 | 0.988425 | T | C | 0.004281555  | 0.002891187 | 0.13863358 | 3549 | 0.4623 |
| 0.506432 | 1.002265 | G | C | 0.004058601  | 0.002874317 | 0.15794332 | 3549 | 0.4598 |
| 0.485519 | 0.949425 | G | A | 0.004534653  | 0.002947117 | 0.12388379 | 3549 | 0.4687 |
| 0.245306 | 0.839369 | T | C | -0.007918995 | 0.003620226 | 0.02871107 | 3549 | 0.7656 |
| 0.506479 | 1.002479 | A | G | 0.004082759  | 0.002873837 | 0.15541427 | 3549 | 0.46   |
| 0.365328 | 0.985371 | T | A | 0.006877507  | 0.003026207 | 0.02304735 | 3549 | 0.4071 |
| 0.498552 | 0.998731 | A | G | 0.004147073  | 0.002873766 | 0.14899804 | 3549 | 0.463  |
| 0.387225 | 0.910888 | T | C | -0.00672056  | 0.003085659 | 0.02940614 | 3549 | 0.6044 |
| 0.364518 | 0.982477 | A | G | 0.00691069   | 0.003032621 | 0.02267988 | 3549 | 0.5937 |
| 0.36538  | 0.985834 | G | A | 0.006895828  | 0.003025464 | 0.02265143 | 3549 | 0.4067 |
| 0.365277 | 0.984626 | G | A | 0.006858445  | 0.003027312 | 0.02348061 | 3549 | 0.4069 |
| 0.365336 | 0.985507 | G | C | 0.0068811    | 0.003025989 | 0.02296596 | 3549 | 0.407  |
| 0.036004 | 0.773943 | G | C | -0.025800581 | 0.008900193 | 0.00374499 | 3549 | 0.9694 |
| 0.365291 | 0.984796 | G | A | 0.006862013  | 0.003027082 | 0.02339792 | 3549 | 0.407  |
| 0.41123  | 0.985633 | C | G | 0.005723602  | 0.002948515 | 0.05223628 | 3549 | 0.6042 |
| 0.110229 | 0.888246 | C | T | -0.000303995 | 0.004782559 | 0.94931804 | 3549 | 0.8794 |
| 0.363676 | 1.02407  | C | T | -0.009152632 | 0.002933134 | 0.00180589 | 3549 | 0.3252 |



## GENOA

| af_genoa | oevar_genoa | coded_genoa | noncoded_genoa | beta_genoa   | se_genoa   | p_genoa    | n_genoa | maf_genoa |
|----------|-------------|-------------|----------------|--------------|------------|------------|---------|-----------|
| 0.4863   | 0.981759369 | G           | A              | -0.009542862 | 0.00620261 | 0.1244874  | 991     | 0.4863    |
| 0.4873   | 0.988681355 | C           | G              | -0.009479123 | 0.00618203 | 0.12575985 | 991     | 0.4873    |
| 0.5697   | 0.962113333 | C           | G              | 0.014537652  | 0.00622841 | 0.01994525 | 991     | 0.4303    |
| 0.5698   | 0.96250553  | A           | G              | 0.014560348  | 0.006226   | 0.01970631 | 991     | 0.4302    |
| 0.5107   | 0.99662403  | C           | T              | -0.006133881 | 0.00613526 | 0.31785224 | 991     | 0.4893    |
| 0.5105   | 0.996349189 | G           | A              | -0.006180971 | 0.00613673 | 0.31427044 | 991     | 0.4895    |
| 0.5107   | 0.996534959 | G           | A              | -0.006149726 | 0.00613575 | 0.31664349 | 991     | 0.4893    |
| 0.5104   | 0.996278236 | T           | A              | -0.006196835 | 0.00613717 | 0.31306644 | 991     | 0.4896    |
| 0.5102   | 0.996129369 | C           | T              | -0.006232963 | 0.00613809 | 0.31032868 | 991     | 0.4898    |
| 0.5121   | 0.987623696 | C           | T              | -0.006291712 | 0.00616262 | 0.30772145 | 991     | 0.4879    |
| 0.512    | 0.987654045 | C           | A              | -0.006309808 | 0.00616283 | 0.30635018 | 991     | 0.488     |
| 0.5532   | 0.974664823 | T           | C              | -0.006851864 | 0.00609122 | 0.26112534 | 991     | 0.4468    |
| 0.3681   | 0.950141706 | A           | G              | -0.007129499 | 0.0063466  | 0.26176862 | 991     | 0.3681    |
| 0.5101   | 0.99609431  | G           | A              | -0.006254734 | 0.00613846 | 0.30867201 | 991     | 0.4899    |
| 0.51     | 0.996043672 | G           | A              | -0.006272175 | 0.00613888 | 0.30735913 | 991     | 0.49      |
| 0.5099   | 0.995997014 | C           | G              | -0.006302068 | 0.00613946 | 0.30510729 | 991     | 0.4901    |
| 0.5067   | 1.0178619   | C           | A              | -0.006657216 | 0.00607013 | 0.27323822 | 991     | 0.4933    |
| 0.5069   | 1.018193158 | A           | T              | -0.006628104 | 0.00606885 | 0.27523769 | 991     | 0.4931    |
| 0.5091   | 0.996142806 | C           | T              | -0.006452383 | 0.00614125 | 0.2938682  | 991     | 0.4909    |
| 0.5093   | 0.99602494  | C           | T              | -0.006411272 | 0.00614095 | 0.29692854 | 991     | 0.4907    |
| 0.4986   | 1.030161383 | G           | A              | -0.007929684 | 0.00605621 | 0.19095541 | 991     | 0.4986    |
| 0.4829   | 1.049148243 | T           | C              | -0.008922056 | 0.00600216 | 0.13771847 | 991     | 0.4829    |
| 0.4825   | 1.04063442  | T           | G              | -0.008996756 | 0.00602774 | 0.13611778 | 991     | 0.4825    |
| 0.5497   | 0.978463748 | A           | G              | -0.006064883 | 0.00610303 | 0.32077589 | 991     | 0.4503    |
| 0.5258   | 0.583574908 | G           | A              | 0.008970029  | 0.00786643 | 0.25465386 | 991     | 0.4742    |
| 0.6339   | 0.98487417  | T           | C              | -0.007876609 | 0.00636312 | 0.21629126 | 991     | 0.3661    |
| 0.3565   | 0.876746955 | A           | G              | -0.006389075 | 0.00664383 | 0.33663935 | 991     | 0.3565    |
| 0.4469   | 0.963379076 | T           | A              | -0.010233476 | 0.00607905 | 0.09285692 | 991     | 0.4469    |
| 0.447    | 0.963172909 | G           | C              | -0.01024111  | 0.00607938 | 0.09263186 | 991     | 0.447     |
| 0.5014   | 1.020953815 | A           | T              | -0.005599969 | 0.00606525 | 0.35625663 | 991     | 0.4986    |
| 0.5654   | 0.976530355 | T           | C              | -0.007462287 | 0.00614478 | 0.2251048  | 991     | 0.4346    |
| 0.5642   | 0.979150639 | T           | G              | -0.0072361   | 0.00613899 | 0.2390153  | 991     | 0.4358    |
| 0.5577   | 0.983301954 | A           | G              | -0.00726093  | 0.00610515 | 0.23482281 | 991     | 0.4423    |
| 0.5382   | 0.959663973 | C           | G              | -0.005742609 | 0.00614494 | 0.35043668 | 991     | 0.4618    |
| 0.5659   | 0.973909284 | A           | T              | -0.007096312 | 0.00615266 | 0.24925123 | 991     | 0.4341    |
| 0.5575   | 0.982561719 | T           | C              | -0.007232353 | 0.0061062  | 0.23674809 | 991     | 0.4425    |
| 0.566    | 0.973584247 | G           | A              | -0.007132041 | 0.00615352 | 0.24694454 | 991     | 0.434     |
| 0.4432   | 0.963633804 | A           | T              | -0.009275117 | 0.00610872 | 0.12949502 | 991     | 0.4432    |
| 0.4898   | 1.045988631 | T           | C              | -0.007627454 | 0.0060044  | 0.20450305 | 991     | 0.4898    |
| 0.5674   | 0.950094544 | T           | G              | -0.00807885  | 0.00620773 | 0.19365247 | 991     | 0.4326    |
| 0.5001   | 1.047122821 | C           | A              | -0.005604953 | 0.00598261 | 0.34922829 | 991     | 0.4999    |
| 0.4895   | 1.040880369 | G           | A              | -0.007725695 | 0.00601887 | 0.19982172 | 991     | 0.4895    |
| 0.4432   | 0.962886013 | T           | G              | -0.009267582 | 0.00611122 | 0.12996289 | 991     | 0.4432    |
| 0.4432   | 0.963125879 | G           | A              | -0.009270137 | 0.00611045 | 0.12980895 | 991     | 0.4432    |

|        |             |   |   |              |            |            |     |        |
|--------|-------------|---|---|--------------|------------|------------|-----|--------|
| 0.4865 | 1.01637299  | T | C | -0.008488613 | 0.00609124 | 0.1639999  | 991 | 0.4865 |
| 0.4431 | 0.960419465 | T | G | -0.009237497 | 0.00611931 | 0.13172025 | 991 | 0.4431 |
| 0.491  | 1.056149526 | C | G | -0.00731755  | 0.00598023 | 0.22161068 | 991 | 0.491  |
| 0.491  | 1.056392444 | A | C | -0.007356491 | 0.00597902 | 0.21907187 | 991 | 0.491  |
| 0.5632 | 0.977157879 | A | G | -0.007179545 | 0.00614014 | 0.24278992 | 991 | 0.4368 |
| 0.3724 | 0.961815082 | G | C | -0.006855629 | 0.00628504 | 0.27583845 | 991 | 0.3724 |
| 0.4909 | 1.055566173 | T | C | -0.007185697 | 0.00598329 | 0.23027618 | 991 | 0.4909 |
| 0.4908 | 1.055503224 | G | T | -0.007161357 | 0.0059837  | 0.23188888 | 991 | 0.4908 |
| 0.491  | 1.056796941 | G | A | -0.007416123 | 0.00597699 | 0.21520848 | 991 | 0.491  |
| 0.491  | 1.056796941 | G | A | -0.007416123 | 0.00597699 | 0.21520848 | 991 | 0.491  |
| 0.3682 | 0.950345456 | A | T | -0.006826133 | 0.00634301 | 0.28231796 | 991 | 0.3682 |
| 0.5672 | 0.949697511 | T | C | -0.008055007 | 0.00620784 | 0.19497665 | 991 | 0.4328 |
| 0.5569 | 0.981589653 | T | C | -0.007173985 | 0.00610623 | 0.24055034 | 991 | 0.4431 |
| 0.3423 | 0.95902294  | T | C | -0.014702838 | 0.00646229 | 0.02327397 | 991 | 0.3423 |
| 0.8529 | 0.971694588 | T | G | 0.014964336  | 0.00886    | 0.09178257 | 991 | 0.1471 |
| 0.5534 | 0.957846425 | A | G | -0.006094871 | 0.00619895 | 0.32593029 | 991 | 0.4466 |
| 0.8518 | 0.974176825 | A | C | 0.015172137  | 0.00881689 | 0.08584066 | 991 | 0.1482 |
| 0.4876 | 1.027478264 | G | A | -0.008677053 | 0.00604169 | 0.15150659 | 991 | 0.4876 |
| 0.4877 | 1.027900793 | T | A | -0.008648809 | 0.00604012 | 0.15273434 | 991 | 0.4877 |
| 0.4626 | 0.959211536 | G | A | -0.010369677 | 0.00615149 | 0.0924094  | 991 | 0.4626 |
| 0.5567 | 0.981336985 | T | C | -0.008229459 | 0.00610022 | 0.17787001 | 991 | 0.4433 |
| 0.8327 | 0.989721001 | G | A | 0.010040433  | 0.00807887 | 0.21446267 | 991 | 0.1673 |
| 0.3423 | 0.959213314 | C | T | -0.014682644 | 0.00646177 | 0.02345212 | 991 | 0.3423 |
| 0.4595 | 0.961611957 | A | T | -0.010451854 | 0.00611791 | 0.08811778 | 991 | 0.4595 |
| 0.851  | 0.977679412 | A | C | 0.015294845  | 0.00877848 | 0.08200498 | 991 | 0.149  |
| 0.488  | 1.028801707 | G | C | -0.008588507 | 0.0060368  | 0.15538445 | 991 | 0.488  |
| 0.489  | 1.026798416 | C | G | -0.009039627 | 0.00604214 | 0.13519386 | 991 | 0.489  |
| 0.5553 | 0.985024179 | T | C | -0.008349062 | 0.00608664 | 0.17070702 | 991 | 0.4447 |
| 0.3423 | 0.959121894 | A | G | -0.014745881 | 0.00646193 | 0.02286718 | 991 | 0.3423 |
| 0.841  | 0.918961991 | A | G | 0.015350795  | 0.0088113  | 0.08202943 | 991 | 0.159  |
| 0.5558 | 0.98508204  | C | G | -0.008311062 | 0.00608691 | 0.17267755 | 991 | 0.4442 |
| 0.4057 | 1.035723921 | G | A | -0.009042601 | 0.00615409 | 0.14229765 | 991 | 0.4057 |
| 0.4022 | 1.023301062 | G | A | -0.008499748 | 0.00618823 | 0.17013814 | 991 | 0.4022 |
| 0.4632 | 0.956379819 | A | G | -0.012002819 | 0.00613147 | 0.05077766 | 991 | 0.4632 |
| 0.4725 | 0.925190212 | A | G | -0.011302016 | 0.00624673 | 0.07094726 | 991 | 0.4725 |
| 0.4623 | 0.955114774 | C | T | -0.010340861 | 0.00615975 | 0.09375481 | 991 | 0.4623 |
| 0.4598 | 0.96043873  | C | G | -0.010515078 | 0.00612    | 0.08632377 | 991 | 0.4598 |
| 0.4687 | 0.944465156 | A | G | -0.014489293 | 0.00618557 | 0.01950885 | 991 | 0.4687 |
| 0.7656 | 0.868435534 | C | T | 0.010311953  | 0.00764507 | 0.17793658 | 991 | 0.2344 |
| 0.46   | 0.960358743 | G | A | -0.010531966 | 0.00611985 | 0.08581384 | 991 | 0.46   |
| 0.4071 | 1.014870036 | T | A | 0.009577611  | 0.00615081 | 0.12000671 | 991 | 0.4071 |
| 0.463  | 0.958532439 | G | A | -0.012013566 | 0.00612424 | 0.05030086 | 991 | 0.463  |
| 0.6044 | 1.031328457 | C | T | 0.010646792  | 0.00610245 | 0.08159215 | 991 | 0.3956 |
| 0.5937 | 1.01121449  | G | A | -0.009466142 | 0.00615513 | 0.12463345 | 991 | 0.4063 |
| 0.4067 | 1.014959934 | G | A | 0.009508945  | 0.00615151 | 0.12272189 | 991 | 0.4067 |
| 0.4069 | 1.004238981 | G | A | 0.00968597   | 0.00618678 | 0.11801104 | 991 | 0.4069 |
| 0.407  | 1.014828139 | G | C | 0.009567811  | 0.00615164 | 0.12043516 | 991 | 0.407  |

|        |             |   |   |              |            |            |     |        |
|--------|-------------|---|---|--------------|------------|------------|-----|--------|
| 0.9694 | 0.830894535 | C | G | 0.006508432  | 0.02048663 | 0.75083768 | 991 | 0.0306 |
| 0.407  | 1.011229147 | G | A | 0.009617301  | 0.00616318 | 0.11922163 | 991 | 0.407  |
| 0.6042 | 0.97072276  | G | C | -0.007719134 | 0.00633031 | 0.22321013 | 991 | 0.3958 |
| 0.8794 | 0.946478265 | T | C | 0.014810571  | 0.0099366  | 0.13665607 | 991 | 0.1206 |
| 0.3252 | 0.896550839 | C | T | -0.017106249 | 0.00673357 | 0.01134115 | 991 | 0.3252 |

**Gutenberg Heart Study**

| af_guten | oevar_guten | coded_guten | noncoded_guten | beta_guten   | se_guten   | p_guten    | n_guten | maf_guten |
|----------|-------------|-------------|----------------|--------------|------------|------------|---------|-----------|
| 0.483345 | 0.949711    | G           | A              | -0.00329573  | 0.00299794 | 0.271174   | 2762    | 0.483345  |
| 0.51648  | 0.949714    | G           | C              | 0.00329188   | 0.00299809 | 0.272534   | 2761    | 0.48352   |
| 0.430841 | 0.976687    | G           | C              | -0.00459936  | 0.00298117 | 0.123381   | 3022    | 0.430841  |
| 0.430818 | 0.976581    | G           | A              | -0.00458917  | 0.00298141 | 0.123783   | 3021    | 0.430818  |
| 0.500166 | 0.982863    | T           | C              | 0.00267697   | 0.00295265 | 0.364234   | 3018    | 0.499834  |
| 0.499834 | 0.983022    | G           | A              | -0.00268304  | 0.00295254 | 0.363996   | 3018    | 0.499834  |
| 0.499834 | 0.982964    | G           | A              | -0.0026777   | 0.00295258 | 0.364758   | 3018    | 0.499834  |
| 0.499834 | 0.983015    | T           | A              | -0.00268446  | 0.00295253 | 0.363792   | 3018    | 0.499834  |
| 0.500166 | 0.982901    | T           | C              | 0.00268318   | 0.00295252 | 0.363055   | 3018    | 0.499834  |
| 0.499336 | 0.980314    | T           | C              | 0.00264877   | 0.00295529 | 0.369483   | 3013    | 0.499336  |
| 0.500664 | 0.980435    | C           | A              | -0.00265082  | 0.00295527 | 0.370689   | 3013    | 0.499336  |
| 0.557395 | 0.998143    | T           | C              | -0.00802581  | 0.00296013 | 0.00669655 | 3110    | 0.442605  |
| 0.636231 | 0.99057     | G           | A              | 0.0058553    | 0.00302364 | 0.0526642  | 3083    | 0.363769  |
| 0.499834 | 0.983019    | G           | A              | -0.00268318  | 0.00295252 | 0.363922   | 3019    | 0.499834  |
| 0.499834 | 0.983036    | G           | A              | -0.00268261  | 0.00295252 | 0.363839   | 3019    | 0.499834  |
| 0.500166 | 0.982901    | G           | C              | 0.00268261   | 0.00295252 | 0.363278   | 3019    | 0.499834  |
| 0.498534 | 0.992505    | C           | A              | -0.00186827  | 0.00293835 | 0.524794   | 3069    | 0.498534  |
| 0.501466 | 0.992506    | T           | A              | 0.00186905   | 0.00293835 | 0.524982   | 3069    | 0.498534  |
| 0.500331 | 0.983102    | T           | C              | 0.00268665   | 0.00295221 | 0.362741   | 3020    | 0.499669  |
| 0.500166 | 0.982999    | T           | C              | 0.00268471   | 0.00295234 | 0.362747   | 3019    | 0.499834  |
| 0.496622 | 1           | G           | A              | -0.002708    | 0.00293237 | 0.355755   | 3108    | 0.496622  |
| 0.478059 | 1           | T           | C              | -0.00343934  | 0.00291202 | 0.237569   | 3122    | 0.478059  |
| 0.478106 | 0.97612     | T           | G              | -0.002645    | 0.00294918 | 0.369473   | 2946    | 0.478106  |
| 0.44811  | 1           | G           | A              | 0.00699285   | 0.00296009 | 0.018158   | 3122    | 0.44811   |
| 0.512484 | 1           | G           | A              | 0.0110502    | 0.00302661 | 0.00026121 | 3084    | 0.487516  |
| 0.660289 | 0.996976    | T           | C              | -0.00467105  | 0.00304432 | 0.124854   | 3110    | 0.339711  |
| 0.653435 | 0.926743    | G           | A              | 0.00432443   | 0.00317245 | 0.173581   | 2809    | 0.346565  |
| 0.450322 | 0.998302    | T           | A              | -0.00769645  | 0.00292851 | 0.00858382 | 3110    | 0.450322  |
| 0.450322 | 0.998261    | G           | C              | -0.00769546  | 0.00292861 | 0.00859451 | 3110    | 0.450322  |
| 0.509622 | 0.988908    | T           | A              | 0.00170317   | 0.00293707 | 0.561746   | 3066    | 0.490378  |
| 0.582745 | 1           | T           | C              | -0.00688951  | 0.00298734 | 0.0210974  | 3118    | 0.417255  |
| 0.582663 | 0.997193    | T           | G              | -0.00670866  | 0.00298332 | 0.0246039  | 3109    | 0.417337  |
| 0.42729  | 1           | G           | A              | 0.00658816   | 0.00296662 | 0.0263669  | 3122    | 0.42729   |
| 0.45664  | 0.968127    | G           | C              | 0.00697903   | 0.00298637 | 0.0197514  | 2952    | 0.45664   |
| 0.41664  | 0.99853     | T           | A              | 0.00680192   | 0.0029843  | 0.022653   | 3113    | 0.41664   |
| 0.572283 | 0.995896    | T           | C              | -0.00672701  | 0.00296861 | 0.0234498  | 3092    | 0.427717  |
| 0.582906 | 0.999128    | G           | A              | -0.00674789  | 0.00298322 | 0.0237006  | 3118    | 0.417094  |
| 0.554397 | 1           | T           | A              | 0.00671661   | 0.00294305 | 0.022478   | 3116    | 0.445603  |
| 0.480942 | 1           | T           | C              | -0.00171138  | 0.00292488 | 0.558473   | 3122    | 0.480942  |
| 0.587599 | 0.962627    | T           | G              | -0.00669981  | 0.00302306 | 0.026794   | 2911    | 0.412401  |
| 0.490391 | 1           | C           | A              | -0.000635501 | 0.00291898 | 0.827653   | 3122    | 0.490391  |
| 0.482532 | 0.998653    | G           | A              | -0.00160637  | 0.00292667 | 0.583174   | 3120    | 0.482532  |
| 0.446371 | 0.99657     | T           | G              | -0.00665433  | 0.00293954 | 0.0235341  | 3114    | 0.446371  |
| 0.446406 | 0.997359    | G           | A              | -0.00664759  | 0.00293876 | 0.0236497  | 3116    | 0.446406  |

|          |          |   |   |              |            |            |      |          |
|----------|----------|---|---|--------------|------------|------------|------|----------|
| 0.477642 | 0.978838 | T | C | -0.00196066  | 0.0029538  | 0.506125   | 2952 | 0.477642 |
| 0.445458 | 0.989954 | T | G | -0.00663538  | 0.00294615 | 0.0241749  | 3071 | 0.445458 |
| 0.517485 | 0.99943  | G | C | 0.00131875   | 0.00292429 | 0.652015   | 3117 | 0.482515 |
| 0.517485 | 0.99943  | C | A | 0.00131875   | 0.00292429 | 0.652015   | 3117 | 0.482515 |
| 0.418081 | 0.990776 | G | A | 0.00677482   | 0.00298567 | 0.0232138  | 3064 | 0.418081 |
| 0.366753 | 0.989062 | G | C | -0.0046312   | 0.00303179 | 0.126668   | 3077 | 0.366753 |
| 0.482515 | 0.99943  | T | C | -0.00131875  | 0.00292429 | 0.652015   | 3117 | 0.482515 |
| 0.517485 | 0.99943  | T | G | 0.00131875   | 0.00292429 | 0.652015   | 3117 | 0.482515 |
| 0.481897 | 1        | G | A | -0.00120561  | 0.00292304 | 0.680011   | 3121 | 0.481897 |
| 0.482223 | 1        | G | A | -0.00118099  | 0.00292624 | 0.686518   | 3122 | 0.482223 |
| 0.644485 | 0.968986 | T | A | 0.00492175   | 0.00308321 | 0.111128   | 2983 | 0.355515 |
| 0.588458 | 0.962169 | T | C | -0.0068063   | 0.00302531 | 0.0244193  | 2911 | 0.411542 |
| 0.57294  | 0.991634 | T | C | -0.00684931  | 0.00297136 | 0.0211454  | 3071 | 0.42706  |
| 0.361958 | 0.998717 | T | C | -0.00671244  | 0.0030382  | 0.0271905  | 3115 | 0.361958 |
| 0.885336 | 0.95836  | T | G | 0.00877027   | 0.00457112 | 0.0554806  | 2987 | 0.114664 |
| 0.423968 | 0.964599 | G | A | 0.00556912   | 0.00301998 | 0.0655882  | 2979 | 0.423968 |
| 0.117667 | 0.96343  | C | A | -0.00866668  | 0.00454746 | 0.0566928  | 3000 | 0.117667 |
| 0.468991 | 0.996595 | G | A | 0.00038263   | 0.00293302 | 0.895683   | 3112 | 0.468991 |
| 0.468991 | 0.996595 | T | A | 0.00038263   | 0.00293302 | 0.895683   | 3112 | 0.468991 |
| 0.477523 | 0.994981 | G | A | -0.00605932  | 0.00293004 | 0.0386459  | 3092 | 0.477523 |
| 0.577224 | 0.993559 | T | C | -0.00742349  | 0.00296329 | 0.0122567  | 3069 | 0.422776 |
| 0.827936 | 0.982831 | G | A | 0.00389456   | 0.00390793 | 0.318038   | 3057 | 0.172064 |
| 0.637981 | 0.999475 | T | C | 0.0062398    | 0.00303229 | 0.0395878  | 3120 | 0.362019 |
| 0.522742 | 1        | T | A | 0.00657705   | 0.00292853 | 0.0247134  | 3122 | 0.477258 |
| 0.12     | 0.972212 | C | A | -0.00854873  | 0.00451141 | 0.0580966  | 3025 | 0.12     |
| 0.468991 | 0.996595 | G | C | 0.000382981  | 0.00293303 | 0.895682   | 3112 | 0.468991 |
| 0.53075  | 1        | G | C | -0.000382205 | 0.0029264  | 0.896087   | 3122 | 0.46925  |
| 0.573335 | 0.996035 | T | C | -0.00746659  | 0.00295836 | 0.0115838  | 3109 | 0.426665 |
| 0.639704 | 1        | G | A | 0.00604796   | 0.00304655 | 0.0471239  | 3103 | 0.360296 |
| 0.12205  | 0.905476 | G | A | -0.00743565  | 0.00451165 | 0.0990507  | 2839 | 0.12205  |
| 0.42623  | 0.996824 | G | C | 0.00744467   | 0.00295831 | 0.0118476  | 3111 | 0.42623  |
| 0.426603 | 0.999603 | G | A | -0.00631136  | 0.00298904 | 0.0346744  | 3120 | 0.426603 |
| 0.429311 | 0.99587  | G | A | -0.00616046  | 0.0029905  | 0.0393977  | 3091 | 0.429311 |
| 0.517179 | 0.992104 | G | A | 0.00670428   | 0.00293252 | 0.0222467  | 3056 | 0.482821 |
| 0.508408 | 0.963538 | G | A | 0.00593915   | 0.00297256 | 0.0457891  | 2914 | 0.491592 |
| 0.52082  | 0.992095 | T | C | 0.00610614   | 0.00293599 | 0.0375036  | 3074 | 0.47918  |
| 0.523771 | 0.998566 | G | C | 0.00637252   | 0.0029296  | 0.029584   | 3113 | 0.476229 |
| 0.516522 | 1        | G | A | 0.00707238   | 0.0029359  | 0.0159993  | 3117 | 0.483478 |
| 0.226308 | 0.909396 | T | C | -0.00664467  | 0.00363747 | 0.0679219  | 2733 | 0.226308 |
| 0.476076 | 0.999097 | G | A | -0.00631491  | 0.00292907 | 0.0310881  | 3114 | 0.476076 |
| 0.408535 | 1        | T | A | 0.00521936   | 0.00297997 | 0.0798627  | 3105 | 0.408535 |
| 0.483643 | 1        | G | A | -0.0068524   | 0.00292742 | 0.0192442  | 3118 | 0.483643 |
| 0.38291  | 1        | T | C | -0.00886497  | 0.00303062 | 0.00344307 | 3113 | 0.38291  |
| 0.593992 | 0.991206 | G | A | -0.005417    | 0.00297144 | 0.0681959  | 3096 | 0.406008 |
| 0.406611 | 0.998796 | G | A | 0.00537775   | 0.0029668  | 0.0698445  | 3116 | 0.406611 |
| 0.406581 | 0.998757 | G | A | 0.00536501   | 0.00296695 | 0.070522   | 3115 | 0.406581 |
| 0.406611 | 0.998878 | G | C | 0.00537177   | 0.00296672 | 0.0701244  | 3116 | 0.406611 |

|           |          |   |   |            |            |            |      |           |
|-----------|----------|---|---|------------|------------|------------|------|-----------|
| 0.0106275 | 0.77367  | G | C | -0.0110879 | 0.0104711  | 0.289678   | 2964 | 0.0106275 |
| 0.406581  | 0.998855 | G | A | 0.0053661  | 0.00296679 | 0.0704378  | 3115 | 0.406581  |
| 0.554484  | 1        | G | C | -0.006276  | 0.00296811 | 0.0344744  | 3111 | 0.445516  |
| 0.9040522 | 0.949436 | T | C | 0.0127457  | 0.00489628 | 0.00930972 | 2986 | 0.0959478 |
| 0.643177  | 1        | T | C | 0.00536654 | 0.00301971 | 0.0755404  | 3122 | 0.356823  |

Health ABC

| af_habc | oevar_habc | coded_habc | noncoded_habc | beta_habc   | se_habc    | p_habc     | n_habc | maf_habc |
|---------|------------|------------|---------------|-------------|------------|------------|--------|----------|
| 0.4988  | 0.9767     | A          | G             | 0.015465851 | 0.00549687 | 0.00496083 | 1564   | 0.4988   |
| 0.5012  | 0.9768     | C          | G             | -0.01547994 | 0.00549609 | 0.00491559 | 1564   | 0.4988   |
| 0.5601  | 0.9991     | C          | G             | 0.009774864 | 0.00548397 | 0.07487148 | 1564   | 0.4399   |
| 0.5602  | 0.9994     | A          | G             | 0.009818172 | 0.00548369 | 0.07357843 | 1564   | 0.4398   |
| 0.533   | 0.9962     | C          | T             | -0.01697609 | 0.00544527 | 0.00185669 | 1564   | 0.467    |
| 0.466   | 0.9996     | A          | G             | 0.016939701 | 0.00543384 | 0.00185758 | 1564   | 0.466    |
| 0.4662  | 0.9988     | A          | G             | 0.016948715 | 0.00543632 | 0.00185609 | 1564   | 0.4662   |
| 0.4695  | 0.9991     | A          | T             | 0.016604412 | 0.00546383 | 0.00241333 | 1564   | 0.4695   |
| 0.5303  | 0.9995     | C          | T             | -0.01658508 | 0.00546355 | 0.00244043 | 1564   | 0.4697   |
| 0.5357  | 0.9746     | C          | T             | -0.01685806 | 0.00553179 | 0.00234639 | 1564   | 0.4643   |
| 0.4644  | 0.9743     | A          | C             | 0.01686088  | 0.00553258 | 0.00234579 | 1564   | 0.4644   |
| 0.4264  | 0.9976     | C          | T             | 0.006355011 | 0.00558542 | 0.25538495 | 1564   | 0.4264   |
| 0.3721  | 0.9989     | A          | G             | -0.0058316  | 0.00571457 | 0.30765963 | 1564   | 0.3721   |
| 0.4698  | 0.999      | A          | G             | 0.016590823 | 0.00546499 | 0.00243841 | 1564   | 0.4698   |
| 0.47    | 0.9981     | A          | G             | 0.016600372 | 0.00546722 | 0.00243431 | 1564   | 0.47     |
| 0.53    | 0.9978     | C          | G             | -0.01660268 | 0.00546778 | 0.0024334  | 1564   | 0.47     |
| 0.4785  | 0.9362     | A          | C             | 0.018451751 | 0.0056218  | 0.00105285 | 1564   | 0.4785   |
| 0.5215  | 0.9349     | A          | T             | -0.01846562 | 0.0056257  | 0.00105215 | 1564   | 0.4785   |
| 0.5282  | 0.9908     | C          | T             | -0.0166787  | 0.00548646 | 0.00240536 | 1564   | 0.4718   |
| 0.5284  | 0.9917     | C          | T             | -0.01667059 | 0.00548407 | 0.00240657 | 1564   | 0.4716   |
| 0.4912  | 0.9786     | A          | G             | 0.017779993 | 0.00552786 | 0.00132454 | 1564   | 0.4912   |
| 0.504   | 0.9986     | C          | T             | 0.016088001 | 0.00544253 | 0.0031636  | 1564   | 0.496    |
| 0.5036  | 0.9989     | G          | T             | 0.016123886 | 0.00543717 | 0.00306787 | 1564   | 0.4964   |
| 0.5702  | 0.9971     | A          | G             | -0.00621093 | 0.005564   | 0.2644784  | 1564   | 0.4298   |
| 0.4816  | 0.9962     | A          | G             | -0.00736396 | 0.00546745 | 0.17821637 | 1564   | 0.4816   |
| 0.3328  | 0.9994     | C          | T             | -0.00025898 | 0.00574764 | 0.96406663 | 1564   | 0.3328   |
| 0.3644  | 0.9981     | A          | G             | -0.00338128 | 0.00568453 | 0.55204841 | 1564   | 0.3644   |
| 0.5298  | 0.9985     | A          | T             | 0.001368799 | 0.00554038 | 0.80489519 | 1564   | 0.4702   |
| 0.5298  | 0.9986     | C          | G             | 0.001379691 | 0.00553983 | 0.80335544 | 1564   | 0.4702   |
| 0.5225  | 0.9787     | A          | T             | -0.01719536 | 0.00552333 | 0.00188417 | 1564   | 0.4775   |
| 0.4057  | 0.9995     | C          | T             | 0.004349059 | 0.00562649 | 0.43966253 | 1564   | 0.4057   |
| 0.4061  | 0.9994     | G          | T             | 0.004379425 | 0.00561818 | 0.4357976  | 1564   | 0.4061   |
| 0.5873  | 0.999      | A          | G             | -0.00465772 | 0.00561084 | 0.40659248 | 1564   | 0.4127   |
| 0.5488  | 0.9828     | C          | G             | -0.00455818 | 0.00554506 | 0.41118787 | 1564   | 0.4512   |
| 0.5954  | 0.9992     | A          | T             | -0.00408965 | 0.00562809 | 0.46755017 | 1564   | 0.4046   |
| 0.4131  | 0.9999     | C          | T             | 0.00469813  | 0.00559852 | 0.40150048 | 1564   | 0.4131   |
| 0.4047  | 0.9995     | A          | G             | 0.004127227 | 0.00562752 | 0.46342404 | 1564   | 0.4047   |
| 0.4667  | 0.9987     | A          | T             | -0.00126797 | 0.00551297 | 0.81812329 | 1564   | 0.4667   |
| 0.5021  | 0.9997     | C          | T             | 0.018319584 | 0.00550432 | 0.00089438 | 1564   | 0.4979   |
| 0.4131  | 0.9994     | G          | T             | 0.004658327 | 0.00560054 | 0.4056693  | 1564   | 0.4131   |
| 0.4881  | 0.8547     | A          | C             | 0.019448709 | 0.00588251 | 0.00096722 | 1564   | 0.4881   |
| 0.5021  | 0.9997     | A          | G             | 0.018319689 | 0.0055043  | 0.00089429 | 1564   | 0.4979   |
| 0.5334  | 0.9991     | G          | T             | 0.001271287 | 0.00551064 | 0.81758051 | 1564   | 0.4666   |
| 0.5332  | 0.9995     | A          | G             | 0.001237227 | 0.00551092 | 0.82239422 | 1564   | 0.4668   |
| 0.5045  | 0.9994     | C          | T             | 0.016048518 | 0.00545225 | 0.00329355 | 1564   | 0.4955   |

|        |        |   |   |             |            |            |      |        |
|--------|--------|---|---|-------------|------------|------------|------|--------|
| 0.5341 | 0.9988 | G | T | 0.001343881 | 0.00550653 | 0.80722238 | 1564 | 0.4659 |
| 0.5016 | 0.9968 | C | G | -0.0177827  | 0.00548721 | 0.00121728 | 1564 | 0.4984 |
| 0.5014 | 0.9977 | A | C | -0.01776596 | 0.00548527 | 0.00122539 | 1564 | 0.4986 |
| 0.5942 | 0.9993 | A | G | -0.00406598 | 0.00562273 | 0.46970684 | 1564 | 0.4058 |
| 0.6243 | 0.9985 | C | G | 0.005692442 | 0.00566271 | 0.31493181 | 1564 | 0.3757 |
| 0.4981 | 0.9954 | C | T | 0.017805304 | 0.00549004 | 0.00120693 | 1564 | 0.4981 |
| 0.502  | 0.9951 | G | T | -0.01781139 | 0.00549073 | 0.001204   | 1564 | 0.498  |
| 0.4987 | 0.998  | A | G | 0.017760653 | 0.00548457 | 0.00122775 | 1564 | 0.4987 |
| 0.4988 | 0.9987 | A | G | 0.017748423 | 0.00548305 | 0.00123345 | 1564 | 0.4988 |
| 0.3689 | 0.9768 | A | T | -0.00418291 | 0.00574109 | 0.46636088 | 1564 | 0.3689 |
| 0.4125 | 0.9971 | C | T | 0.004447637 | 0.00561187 | 0.42816589 | 1564 | 0.4125 |
| 0.4125 | 0.9982 | C | T | 0.004296833 | 0.00560619 | 0.44352783 | 1564 | 0.4125 |
| 0.6462 | 0.9971 | C | T | -0.00227996 | 0.00568769 | 0.68857953 | 1564 | 0.3538 |
| 0.1064 | 1      | G | T | -0.00064761 | 0.00904172 | 0.94291019 | 1564 | 0.1064 |
| 0.5806 | 0.9988 | A | G | -0.00217403 | 0.00554394 | 0.69500396 | 1564 | 0.4194 |
| 0.8936 | 1      | A | C | 0.000647606 | 0.00904172 | 0.94291019 | 1564 | 0.1064 |
| 0.4951 | 0.8731 | A | G | 0.018571337 | 0.0057988  | 0.00138933 | 1564 | 0.4951 |
| 0.4953 | 0.8708 | A | T | 0.018584613 | 0.00580626 | 0.00139812 | 1564 | 0.4953 |
| 0.5123 | 0.9985 | A | G | -0.00045822 | 0.00551594 | 0.93380552 | 1564 | 0.4877 |
| 0.4206 | 0.9979 | C | T | 0.006419806 | 0.00559373 | 0.2512772  | 1564 | 0.4206 |
| 0.1724 | 0.9991 | A | G | -0.01209966 | 0.00735067 | 0.0999524  | 1564 | 0.1724 |
| 0.3548 | 1      | C | T | 0.002045112 | 0.00567544 | 0.7186384  | 1564 | 0.3548 |
| 0.4921 | 0.9981 | A | T | 0.000943139 | 0.00551726 | 0.86429048 | 1564 | 0.4921 |
| 0.8936 | 1      | A | C | 0.000647606 | 0.00904172 | 0.94291019 | 1564 | 0.1064 |
| 0.4959 | 0.8624 | C | G | 0.018617195 | 0.00583402 | 0.00144531 | 1564 | 0.4959 |
| 0.5028 | 0.8452 | C | G | -0.01868205 | 0.00589226 | 0.00155078 | 1564 | 0.4972 |
| 0.421  | 0.9952 | C | T | 0.006395927 | 0.00560141 | 0.25369461 | 1564 | 0.421  |
| 0.354  | 0.9949 | A | G | 0.002544244 | 0.00568641 | 0.65462992 | 1564 | 0.354  |
| 0.8802 | 0.8479 | A | G | -0.00046643 | 0.00926907 | 0.95987256 | 1564 | 0.1198 |
| 0.5792 | 0.9969 | C | G | -0.00640714 | 0.00559663 | 0.25245859 | 1564 | 0.4208 |
| 0.5778 | 0.9992 | A | G | 0.006406946 | 0.0055641  | 0.24971125 | 1564 | 0.4222 |
| 0.5772 | 0.9996 | A | G | 0.006481399 | 0.00556258 | 0.24412459 | 1564 | 0.4228 |
| 0.4896 | 0.9996 | A | G | -0.00112176 | 0.00550232 | 0.83848215 | 1564 | 0.4896 |
| 0.4877 | 0.999  | A | G | 0.000522401 | 0.00551393 | 0.92453187 | 1564 | 0.4877 |
| 0.4885 | 0.9971 | C | T | 0.000828704 | 0.00551375 | 0.88054916 | 1564 | 0.4885 |
| 0.4919 | 0.9991 | C | G | 0.00086663  | 0.00551649 | 0.87518783 | 1564 | 0.4919 |
| 0.5016 | 0.9989 | A | G | -0.00311985 | 0.00548572 | 0.56962624 | 1564 | 0.4984 |
| 0.7574 | 0.9994 | C | T | 0.008832601 | 0.0063791  | 0.16636786 | 1564 | 0.2426 |
| 0.5081 | 0.9994 | A | G | -0.00084858 | 0.00551622 | 0.87776138 | 1564 | 0.4919 |
| 0.6065 | 0.9989 | A | T | -0.00863443 | 0.00559895 | 0.12323954 | 1564 | 0.3935 |
| 0.5128 | 0.9913 | A | G | 0.000690864 | 0.00552981 | 0.90059148 | 1564 | 0.4872 |
| 0.601  | 1      | C | T | 0.006349893 | 0.00554872 | 0.25263816 | 1564 | 0.399  |
| 0.3931 | 0.9951 | A | G | 0.008522789 | 0.00561009 | 0.1289174  | 1564 | 0.3931 |
| 0.6065 | 0.9986 | A | G | -0.00864219 | 0.00559982 | 0.12296125 | 1564 | 0.3935 |
| 0.6142 | 0.9999 | A | G | -0.00783177 | 0.00561768 | 0.163477   | 1564 | 0.3858 |
| 0.6065 | 0.9988 | C | G | -0.00863543 | 0.00559913 | 0.12320834 | 1564 | 0.3935 |
| 0.9708 | 0.9655 | C | G | 0.008154465 | 0.0162193  | 0.61520187 | 1564 | 0.0292 |



|        |        |   |   |             |            |            |      |        |
|--------|--------|---|---|-------------|------------|------------|------|--------|
| 0.6068 | 0.9975 | A | G | -0.0086085  | 0.00560383 | 0.12469691 | 1564 | 0.3932 |
| 0.3688 | 0.8623 | C | G | 0.006167875 | 0.00607977 | 0.31050556 | 1564 | 0.3688 |
| 0.0882 | 0.9543 | C | T | -0.00093303 | 0.01003655 | 0.92594438 | 1564 | 0.0882 |
| 0.3622 | 0.9959 | C | T | 0.005511626 | 0.00567552 | 0.33163749 | 1564 | 0.3622 |

InCHIANTI

| af_inch2 | oevar_inch2 | coded_inch2 | noncoded_inch2 | beta_inch2 | se_inch2 | p_inch2  | n_inch2 | maf_inch2 |
|----------|-------------|-------------|----------------|------------|----------|----------|---------|-----------|
| 0.567    | 0.9546      | G           | A              | -0.016     | 0.006    | 0.01698  | 1130    | 0.433     |
| 0.4328   | 0.9548      | G           | C              | 0.015      | 0.006    | 0.01712  | 1130    | 0.4328    |
| 0.4952   | 0.9929      | G           | C              | -0.015     | 0.006    | 0.01778  | 1130    | 0.4952    |
| 0.4956   | 0.9928      | G           | A              | -0.015     | 0.006    | 0.01782  | 1130    | 0.4956    |
| 0.4068   | 0.9887      | T           | C              | 0.018      | 0.006    | 0.005233 | 1130    | 0.4068    |
| 0.596    | 0.9989      | G           | A              | -0.018     | 0.006    | 0.005359 | 1130    | 0.404     |
| 0.5949   | 0.9946      | G           | A              | -0.018     | 0.006    | 0.005301 | 1130    | 0.4051    |
| 0.5944   | 0.9971      | T           | A              | -0.018     | 0.006    | 0.005741 | 1130    | 0.4056    |
| 0.4062   | 0.9981      | T           | C              | 0.018      | 0.006    | 0.005941 | 1130    | 0.4062    |
| 0.4009   | 0.9745      | T           | C              | 0.017      | 0.006    | 0.007205 | 1130    | 0.4009    |
| 0.5988   | 0.9731      | C           | A              | -0.017     | 0.006    | 0.007494 | 1130    | 0.4012    |
| 0.6446   | 0.9562      | T           | C              | -0.015     | 0.007    | 0.02304  | 1130    | 0.3554    |
| 0.5701   | 0.9408      | G           | A              | 0.015      | 0.007    | 0.0265   | 1130    | 0.4299    |
| 0.5938   | 0.9976      | G           | A              | -0.017     | 0.006    | 0.006015 | 1130    | 0.4062    |
| 0.5936   | 0.997       | G           | A              | -0.017     | 0.006    | 0.006118 | 1130    | 0.4064    |
| 0.4065   | 0.996       | G           | C              | 0.017      | 0.006    | 0.006292 | 1130    | 0.4065    |
| 0.5826   | 0.8922      | C           | A              | -0.019     | 0.007    | 0.005144 | 1130    | 0.4174    |
| 0.4174   | 0.8913      | T           | A              | 0.019      | 0.007    | 0.005175 | 1130    | 0.4174    |
| 0.4073   | 0.9921      | T           | C              | 0.017      | 0.006    | 0.007056 | 1130    | 0.4073    |
| 0.4072   | 0.9926      | T           | C              | 0.017      | 0.006    | 0.006941 | 1130    | 0.4072    |
| 0.5781   | 0.9684      | G           | A              | -0.016     | 0.006    | 0.01276  | 1130    | 0.4219    |
| 0.5604   | 0.9961      | T           | C              | -0.016     | 0.006    | 0.01413  | 1130    | 0.4396    |
| 0.5606   | 0.9965      | T           | G              | -0.016     | 0.006    | 0.01367  | 1130    | 0.4394    |
| 0.3593   | 0.9532      | G           | A              | 0.015      | 0.007    | 0.02223  | 1130    | 0.3593    |
| 0.5316   | 0.7745      | G           | A              | 0.015      | 0.007    | 0.03414  | 1130    | 0.4684    |
| 0.7134   | 0.9995      | T           | C              | -0.014     | 0.007    | 0.04043  | 1130    | 0.2866    |
| 0.5888   | 0.904       | G           | A              | 0.013      | 0.007    | 0.05321  | 1130    | 0.4112    |
| 0.5304   | 0.9481      | T           | A              | -0.018     | 0.006    | 0.0056   | 1130    | 0.4696    |
| 0.5303   | 0.9482      | G           | C              | -0.018     | 0.006    | 0.005605 | 1130    | 0.4697    |
| 0.4137   | 0.9759      | T           | A              | 0.017      | 0.006    | 0.009999 | 1130    | 0.4137    |
| 0.6614   | 0.9963      | T           | C              | -0.013     | 0.007    | 0.04915  | 1130    | 0.3386    |
| 0.661    | 0.9977      | T           | G              | -0.013     | 0.007    | 0.05017  | 1130    | 0.339     |
| 0.3459   | 0.9966      | G           | A              | 0.014      | 0.007    | 0.03221  | 1130    | 0.3459    |
| 0.375    | 0.9454      | G           | C              | 0.016      | 0.007    | 0.01423  | 1130    | 0.375     |
| 0.3379   | 0.9963      | T           | A              | 0.013      | 0.007    | 0.04918  | 1130    | 0.3379    |
| 0.6537   | 0.9985      | T           | C              | -0.014     | 0.007    | 0.0329   | 1130    | 0.3463    |
| 0.6619   | 0.9969      | G           | A              | -0.013     | 0.007    | 0.04872  | 1130    | 0.3381    |
| 0.471    | 0.9475      | T           | A              | 0.018      | 0.006    | 0.004408 | 1130    | 0.471     |
| 0.5693   | 0.9714      | T           | C              | -0.015     | 0.006    | 0.0221   | 1130    | 0.4307    |
| 0.6537   | 0.9981      | T           | G              | -0.014     | 0.007    | 0.03321  | 1130    | 0.3463    |
| 0.5702   | 0.8096      | C           | A              | -0.018     | 0.007    | 0.008654 | 1130    | 0.4298    |
| 0.5693   | 0.9708      | G           | A              | -0.015     | 0.006    | 0.02204  | 1130    | 0.4307    |
| 0.5293   | 0.9479      | T           | G              | -0.018     | 0.006    | 0.004395 | 1130    | 0.4707    |
| 0.5292   | 0.9478      | G           | A              | -0.018     | 0.006    | 0.004394 | 1130    | 0.4708    |

|        |        |   |   |        |       |          |      |        |
|--------|--------|---|---|--------|-------|----------|------|--------|
| 0.5602 | 0.9918 | T | C | -0.015 | 0.006 | 0.01545  | 1130 | 0.4398 |
| 0.5312 | 0.9544 | T | G | -0.018 | 0.006 | 0.004375 | 1130 | 0.4688 |
| 0.4295 | 0.9793 | G | C | 0.015  | 0.006 | 0.02252  | 1130 | 0.4295 |
| 0.4296 | 0.9797 | C | A | 0.015  | 0.006 | 0.02284  | 1130 | 0.4296 |
| 0.339  | 0.9968 | G | A | 0.013  | 0.007 | 0.05012  | 1130 | 0.339  |
| 0.4314 | 0.9452 | G | C | -0.015 | 0.007 | 0.02052  | 1130 | 0.4314 |
| 0.5707 | 0.9786 | T | C | -0.015 | 0.006 | 0.02169  | 1130 | 0.4293 |
| 0.4292 | 0.9784 | T | G | 0.015  | 0.006 | 0.02162  | 1130 | 0.4292 |
| 0.5703 | 0.9802 | G | A | -0.014 | 0.006 | 0.02335  | 1130 | 0.4297 |
| 0.5702 | 0.9805 | G | A | -0.014 | 0.006 | 0.02361  | 1130 | 0.4298 |
| 0.5771 | 0.9374 | T | A | 0.015  | 0.007 | 0.01842  | 1130 | 0.4229 |
| 0.6544 | 0.9951 | T | C | -0.014 | 0.007 | 0.03085  | 1130 | 0.3456 |
| 0.6543 | 0.9955 | T | C | -0.014 | 0.007 | 0.03047  | 1130 | 0.3457 |
| 0.3835 | 0.9986 | T | C | -0.007 | 0.006 | 0.2986   | 1130 | 0.3835 |
| 0.8492 | 1      | T | G | 0.025  | 0.009 | 0.004779 | 1130 | 0.1508 |
| 0.3508 | 0.9995 | G | A | 0.012  | 0.007 | 0.06272  | 1130 | 0.3508 |
| 0.1508 | 1      | C | A | -0.025 | 0.009 | 0.004778 | 1130 | 0.1508 |
| 0.5564 | 0.8414 | G | A | -0.018 | 0.007 | 0.008343 | 1130 | 0.4436 |
| 0.5558 | 0.8355 | T | A | -0.018 | 0.007 | 0.008414 | 1130 | 0.4442 |
| 0.5461 | 0.9844 | G | A | -0.015 | 0.006 | 0.01446  | 1130 | 0.4539 |
| 0.6534 | 0.9745 | T | C | -0.013 | 0.007 | 0.05715  | 1130 | 0.3466 |
| 0.7823 | 0.993  | G | A | 0.004  | 0.008 | 0.6397   | 1130 | 0.2177 |
| 0.6158 | 0.9994 | T | C | 0.007  | 0.006 | 0.3018   | 1130 | 0.3842 |
| 0.452  | 0.9824 | T | A | 0.016  | 0.006 | 0.01376  | 1130 | 0.452  |
| 0.1508 | 1      | C | A | -0.025 | 0.009 | 0.004778 | 1130 | 0.1508 |
| 0.5553 | 0.8302 | G | C | -0.018 | 0.007 | 0.008565 | 1130 | 0.4447 |
| 0.4483 | 0.8002 | G | C | 0.018  | 0.007 | 0.00973  | 1130 | 0.4483 |
| 0.6528 | 0.9732 | T | C | -0.013 | 0.007 | 0.05805  | 1130 | 0.3472 |
| 0.6175 | 0.9953 | G | A | 0.007  | 0.006 | 0.2965   | 1130 | 0.3825 |
| 0.1598 | 0.9304 | G | A | -0.026 | 0.009 | 0.003281 | 1130 | 0.1598 |
| 0.3469 | 0.9738 | G | C | 0.013  | 0.007 | 0.05762  | 1130 | 0.3469 |
| 0.4748 | 0.9999 | G | A | -0.004 | 0.006 | 0.4906   | 1130 | 0.4748 |
| 0.4748 | 1      | G | A | -0.004 | 0.006 | 0.491    | 1130 | 0.4748 |
| 0.4471 | 0.975  | G | A | 0.015  | 0.006 | 0.02333  | 1130 | 0.4471 |
| 0.4541 | 0.9847 | G | A | 0.015  | 0.006 | 0.01481  | 1130 | 0.4541 |
| 0.4517 | 0.9825 | T | C | 0.016  | 0.006 | 0.01347  | 1130 | 0.4517 |
| 0.4527 | 0.9839 | G | C | 0.016  | 0.006 | 0.01387  | 1130 | 0.4527 |
| 0.4368 | 0.9806 | G | A | 0.013  | 0.006 | 0.03867  | 1130 | 0.4368 |
| 0.2863 | 0.9961 | T | C | -0.001 | 0.007 | 0.8457   | 1130 | 0.2863 |
| 0.5471 | 0.9844 | G | A | -0.016 | 0.006 | 0.01388  | 1130 | 0.4529 |
| 0.3268 | 0.9971 | T | A | 0.014  | 0.007 | 0.04286  | 1130 | 0.3268 |
| 0.5519 | 0.97   | G | A | -0.015 | 0.006 | 0.02337  | 1130 | 0.4481 |
| 0.4105 | 0.9897 | T | C | -0.004 | 0.006 | 0.5204   | 1130 | 0.4105 |
| 0.6729 | 0.9902 | G | A | -0.013 | 0.007 | 0.05273  | 1130 | 0.3271 |
| 0.3273 | 0.9945 | G | A | 0.014  | 0.007 | 0.04245  | 1130 | 0.3273 |
| 0.3266 | 0.9985 | G | A | 0.014  | 0.007 | 0.04302  | 1130 | 0.3266 |
| 0.3269 | 0.9964 | G | C | 0.014  | 0.007 | 0.04274  | 1130 | 0.3269 |

|        |        |   |   |       |       |          |      |        |
|--------|--------|---|---|-------|-------|----------|------|--------|
| 0.0334 | 0.8181 | G | C | -0.02 | 0.019 | 0.291    | 1130 | 0.0334 |
| 0.3266 | 0.9981 | G | A | 0.014 | 0.007 | 0.04295  | 1130 | 0.3266 |
| 0.6877 | 0.7822 | G | C | -0.02 | 0.008 | 0.007989 | 1130 | 0.3123 |
| 0.8767 | 0.9466 | T | C | 0.022 | 0.01  | 0.02675  | 1130 | 0.1233 |
| 0.6227 | 0.7968 | T | C | 0.009 | 0.007 | 0.2111   | 1130 | 0.3773 |

## KORA3

| af_kora3 | oevar_kora3 | coded_kora3 | noncoded_kora3 | beta_kora3 | se_kora3 | p_kora3 | n_kora3 | maf_kora3 |
|----------|-------------|-------------|----------------|------------|----------|---------|---------|-----------|
| 0.4954   | 0.9951      | A           | G              | 0.004      | 0.005    | 0.4389  | 1581    | 0.4954    |
| 0.4951   | 0.9981      | G           | C              | 0.004      | 0.005    | 0.4403  | 1581    | 0.4951    |
| 0.4182   | 0.8779      | G           | C              | -0.008     | 0.005    | 0.1112  | 1581    | 0.4182    |
| 0.4184   | 0.8806      | G           | A              | -0.008     | 0.005    | 0.1141  | 1581    | 0.4184    |
| 0.4425   | 0.9409      | T           | C              | 0.008      | 0.005    | 0.07597 | 1581    | 0.4425    |
| 0.444    | 0.9372      | A           | G              | 0.008      | 0.005    | 0.07985 | 1581    | 0.444     |
| 0.4438   | 0.9376      | A           | G              | 0.008      | 0.005    | 0.07853 | 1581    | 0.4438    |
| 0.4451   | 0.9356      | A           | T              | 0.008      | 0.005    | 0.08146 | 1581    | 0.4451    |
| 0.4453   | 0.9355      | T           | C              | 0.008      | 0.005    | 0.08426 | 1581    | 0.4453    |
| 0.4441   | 0.9244      | T           | C              | 0.007      | 0.005    | 0.1118  | 1581    | 0.4441    |
| 0.4442   | 0.9245      | A           | C              | 0.007      | 0.005    | 0.1185  | 1581    | 0.4442    |
| 0.425    | 0.9981      | C           | T              | 0.004      | 0.005    | 0.3823  | 1581    | 0.425     |
| 0.6258   | 0.9563      | G           | A              | 0.005      | 0.005    | 0.2782  | 1581    | 0.3742    |
| 0.4454   | 0.9354      | A           | G              | 0.008      | 0.005    | 0.08874 | 1581    | 0.4454    |
| 0.4455   | 0.9353      | A           | G              | 0.008      | 0.005    | 0.09687 | 1581    | 0.4455    |
| 0.4461   | 0.9352      | G           | C              | 0.008      | 0.005    | 0.1025  | 1581    | 0.4461    |
| 0.4447   | 0.9588      | A           | C              | 0.008      | 0.005    | 0.08662 | 1581    | 0.4447    |
| 0.4445   | 0.9598      | T           | A              | 0.008      | 0.005    | 0.0852  | 1581    | 0.4445    |
| 0.4497   | 0.941       | T           | C              | 0.007      | 0.005    | 0.1487  | 1581    | 0.4497    |
| 0.4489   | 0.9386      | T           | C              | 0.007      | 0.005    | 0.1331  | 1581    | 0.4489    |
| 0.4617   | 0.9756      | A           | G              | 0.006      | 0.005    | 0.2142  | 1581    | 0.4617    |
| 0.49     | 0.9991      | C           | T              | 0.006      | 0.005    | 0.1817  | 1581    | 0.49      |
| 0.4913   | 0.9867      | G           | T              | 0.006      | 0.005    | 0.207   | 1581    | 0.4913    |
| 0.43     | 1           | G           | A              | 0.005      | 0.005    | 0.3124  | 1581    | 0.43      |
| 0.4423   | 0.1112      | A           | G              | -0.025     | 0.013    | 0.06518 | 1581    | 0.4423    |
| 0.3007   | 0.9392      | C           | T              | 0.001      | 0.005    | 0.9182  | 1581    | 0.3007    |
| 0.6435   | 0.6868      | G           | A              | 0.006      | 0.006    | 0.2765  | 1581    | 0.3565    |
| 0.555    | 0.9988      | A           | T              | 0.004      | 0.005    | 0.4335  | 1581    | 0.445     |
| 0.555    | 0.9982      | C           | G              | 0.004      | 0.005    | 0.4331  | 1581    | 0.445     |
| 0.4654   | 0.9488      | T           | A              | 0.007      | 0.005    | 0.1388  | 1581    | 0.4654    |
| 0.41     | 1           | C           | T              | 0.005      | 0.005    | 0.3137  | 1581    | 0.41      |
| 0.4105   | 0.995       | G           | T              | 0.005      | 0.005    | 0.2615  | 1581    | 0.4105    |
| 0.415    | 1           | G           | A              | 0.005      | 0.005    | 0.3164  | 1581    | 0.415     |
| 0.4441   | 0.8719      | G           | C              | 0.006      | 0.005    | 0.2665  | 1581    | 0.4441    |
| 0.4099   | 0.9994      | T           | A              | 0.005      | 0.005    | 0.2679  | 1581    | 0.4099    |
| 0.4158   | 0.9944      | C           | T              | 0.005      | 0.005    | 0.2592  | 1581    | 0.4158    |
| 0.4098   | 0.9993      | A           | G              | 0.005      | 0.005    | 0.2733  | 1581    | 0.4098    |
| 0.56     | 1           | T           | A              | 0.005      | 0.005    | 0.3361  | 1581    | 0.44      |
| 0.4651   | 0.9993      | C           | T              | 0.007      | 0.005    | 0.1321  | 1581    | 0.4651    |
| 0.4051   | 0.9522      | G           | T              | 0.005      | 0.005    | 0.2747  | 1581    | 0.4051    |
| 0.458    | 0.9936      | A           | C              | 0.008      | 0.005    | 0.06635 | 1581    | 0.458     |
| 0.4655   | 0.996       | A           | G              | 0.006      | 0.005    | 0.1711  | 1581    | 0.4655    |
| 0.5602   | 0.9779      | G           | T              | 0.004      | 0.005    | 0.3505  | 1581    | 0.4398    |
| 0.5601   | 0.9905      | A           | G              | 0.004      | 0.005    | 0.3451  | 1581    | 0.4399    |
| 0.4719   | 0.9566      | C           | T              | 0.007      | 0.005    | 0.1544  | 1581    | 0.4719    |
| 0.5607   | 0.9529      | G           | T              | 0.004      | 0.005    | 0.4114  | 1581    | 0.4393    |

|        |        |   |   |        |       |         |      |        |
|--------|--------|---|---|--------|-------|---------|------|--------|
| 0.4758 | 0.9924 | G | C | 0.006  | 0.005 | 0.1811  | 1581 | 0.4758 |
| 0.4751 | 0.9986 | C | A | 0.006  | 0.005 | 0.1797  | 1581 | 0.4751 |
| 0.4142 | 0.9773 | G | A | 0.005  | 0.005 | 0.2667  | 1581 | 0.4142 |
| 0.6176 | 0.9461 | C | G | 0.007  | 0.005 | 0.1606  | 1581 | 0.3824 |
| 0.4769 | 0.9844 | C | T | 0.006  | 0.005 | 0.1927  | 1581 | 0.4769 |
| 0.4771 | 0.9837 | T | G | 0.006  | 0.005 | 0.1979  | 1581 | 0.4771 |
| 0.475  | 1      | A | G | 0.006  | 0.005 | 0.1745  | 1581 | 0.475  |
| 0.475  | 0.9999 | A | G | 0.006  | 0.005 | 0.1746  | 1581 | 0.475  |
| 0.6269 | 0.8565 | T | A | 0.008  | 0.005 | 0.1444  | 1581 | 0.3731 |
| 0.4053 | 0.9504 | C | T | 0.005  | 0.005 | 0.2847  | 1581 | 0.4053 |
| 0.4177 | 0.9838 | C | T | 0.005  | 0.005 | 0.2588  | 1581 | 0.4177 |
| 0.6345 | 0.9136 | C | T | -0.001 | 0.005 | 0.8149  | 1581 | 0.3655 |
| 0.109  | 0.9295 | G | T | 0.002  | 0.007 | 0.7614  | 1581 | 0.109  |
| 0.4199 | 0.8634 | G | A | 0.006  | 0.005 | 0.2349  | 1581 | 0.4199 |
| 0.1102 | 0.9375 | C | A | 0.002  | 0.007 | 0.7309  | 1581 | 0.1102 |
| 0.4753 | 0.9868 | A | G | 0.009  | 0.005 | 0.05197 | 1581 | 0.4753 |
| 0.4751 | 0.9882 | A | T | 0.009  | 0.005 | 0.04934 | 1581 | 0.4751 |
| 0.5408 | 0.9937 | A | G | 0.005  | 0.005 | 0.3143  | 1581 | 0.4592 |
| 0.4181 | 0.9832 | C | T | 0.006  | 0.005 | 0.2318  | 1581 | 0.4181 |
| 0.1459 | 0.974  | A | G | 0.003  | 0.006 | 0.5932  | 1581 | 0.1459 |
| 0.6363 | 0.9301 | T | C | -0.001 | 0.005 | 0.8777  | 1581 | 0.3637 |
| 0.54   | 1      | T | A | 0.005  | 0.005 | 0.3146  | 1581 | 0.46   |
| 0.111  | 0.9435 | C | A | 0.003  | 0.007 | 0.6864  | 1581 | 0.111  |
| 0.4743 | 0.9944 | C | G | 0.009  | 0.005 | 0.04601 | 1581 | 0.4743 |
| 0.4744 | 0.9961 | G | C | 0.009  | 0.005 | 0.05242 | 1581 | 0.4744 |
| 0.4206 | 0.9896 | C | T | 0.006  | 0.005 | 0.2316  | 1581 | 0.4206 |
| 0.6384 | 0.9128 | G | A | -0.001 | 0.005 | 0.8136  | 1581 | 0.3616 |
| 0.12   | 0.8606 | G | A | 0.001  | 0.007 | 0.8427  | 1581 | 0.12   |
| 0.4197 | 0.9886 | G | C | 0.006  | 0.005 | 0.2318  | 1581 | 0.4197 |
| 0.5391 | 0.9827 | G | A | 0.006  | 0.005 | 0.1957  | 1581 | 0.4609 |
| 0.5294 | 0.9497 | G | A | 0.005  | 0.005 | 0.3241  | 1581 | 0.4706 |
| 0.5415 | 0.9818 | T | C | 0.005  | 0.005 | 0.2396  | 1581 | 0.4585 |
| 0.5399 | 0.9994 | G | C | 0.005  | 0.005 | 0.3147  | 1581 | 0.4601 |
| 0.5198 | 0.9164 | G | A | 0.006  | 0.005 | 0.1728  | 1581 | 0.4802 |
| 0.2877 | 0.8573 | T | C | -0.011 | 0.006 | 0.07039 | 1573 | 0.2877 |
| 0.5398 | 0.9992 | A | G | 0.005  | 0.005 | 0.3148  | 1581 | 0.4602 |
| 0.5984 | 0.9846 | A | T | -0.005 | 0.005 | 0.3106  | 1581 | 0.4016 |
| 0.5396 | 0.9964 | A | G | 0.006  | 0.005 | 0.1867  | 1581 | 0.4604 |
| 0.3347 | 0.9827 | T | C | 0.001  | 0.005 | 0.8059  | 1581 | 0.3347 |
| 0.3964 | 0.9689 | A | G | 0.005  | 0.005 | 0.3167  | 1581 | 0.3964 |
| 0.5988 | 0.9705 | A | G | -0.005 | 0.005 | 0.3129  | 1581 | 0.4012 |
| 0.5995 | 0.9769 | A | G | -0.005 | 0.005 | 0.3221  | 1581 | 0.4005 |
| 0.5986 | 0.9763 | C | G | -0.005 | 0.005 | 0.314   | 1581 | 0.4014 |
| 0.0284 | 0.7839 | G | C | -0.018 | 0.013 | 0.1826  | 1581 | 0.0284 |
| 0.5987 | 0.9824 | A | G | -0.005 | 0.005 | 0.3163  | 1581 | 0.4013 |
| 0.3906 | 0.9635 | C | G | 0.002  | 0.005 | 0.6632  | 1581 | 0.3906 |
| 0.0946 | 0.9163 | C | T | 0.003  | 0.007 | 0.7033  | 1581 | 0.0946 |
| 0.6294 | 0.9954 | T | C | -0.003 | 0.005 | 0.4707  | 1581 | 0.3706 |

## KORA4

| af_kora4 | oevar_kora4 | coded_kora4 | noncoded_kora4 | beta_kora4 | se_kora4 | p_kora4 | n_kora4 | maf_kora4 |
|----------|-------------|-------------|----------------|------------|----------|---------|---------|-----------|
| 0.4963   | 0.9842      | G           | A              | -0.01      | 0.005    | 0.04198 | 1407    | 0.4963    |
| 0.5032   | 0.9893      | G           | C              | 0.01       | 0.005    | 0.04117 | 1407    | 0.4968    |
| 0.434    | 0.9476      | G           | C              | -0.007     | 0.005    | 0.1405  | 1407    | 0.434     |
| 0.4344   | 0.9468      | G           | A              | -0.007     | 0.005    | 0.1397  | 1407    | 0.4344    |
| 0.4854   | 0.9606      | T           | C              | 0.007      | 0.005    | 0.1559  | 1407    | 0.4854    |
| 0.5143   | 0.9604      | G           | A              | -0.007     | 0.005    | 0.154   | 1407    | 0.4857    |
| 0.5145   | 0.9605      | G           | A              | -0.007     | 0.005    | 0.155   | 1407    | 0.4855    |
| 0.5142   | 0.9604      | T           | A              | -0.007     | 0.005    | 0.1535  | 1407    | 0.4858    |
| 0.486    | 0.9603      | T           | C              | 0.007      | 0.005    | 0.1523  | 1407    | 0.486     |
| 0.4839   | 0.9507      | T           | C              | 0.008      | 0.005    | 0.126   | 1407    | 0.4839    |
| 0.516    | 0.9509      | C           | A              | -0.008     | 0.005    | 0.1256  | 1407    | 0.484     |
| 0.5746   | 0.9859      | T           | C              | -0.008     | 0.005    | 0.1034  | 1407    | 0.4254    |
| 0.6358   | 0.9554      | G           | A              | 0.009      | 0.005    | 0.08848 | 1407    | 0.3642    |
| 0.5137   | 0.9604      | G           | A              | -0.007     | 0.005    | 0.1504  | 1407    | 0.4863    |
| 0.5136   | 0.9605      | G           | A              | -0.007     | 0.005    | 0.1496  | 1407    | 0.4864    |
| 0.4866   | 0.9605      | G           | C              | 0.007      | 0.005    | 0.149   | 1407    | 0.4866    |
| 0.5091   | 0.977       | C           | A              | -0.008     | 0.005    | 0.1272  | 1407    | 0.4909    |
| 0.4903   | 0.9786      | T           | A              | 0.008      | 0.005    | 0.1305  | 1407    | 0.4903    |
| 0.4878   | 0.9631      | T           | C              | 0.007      | 0.005    | 0.1424  | 1407    | 0.4878    |
| 0.4875   | 0.9622      | T           | C              | 0.007      | 0.005    | 0.144   | 1407    | 0.4875    |
| 0.5025   | 0.9865      | G           | A              | -0.008     | 0.005    | 0.09371 | 1407    | 0.4975    |
| 0.4903   | 0.9983      | T           | C              | -0.007     | 0.005    | 0.1599  | 1407    | 0.4903    |
| 0.4894   | 0.974       | T           | G              | -0.008     | 0.005    | 0.1305  | 1407    | 0.4894    |
| 0.4326   | 0.9959      | G           | A              | 0.007      | 0.005    | 0.1695  | 1407    | 0.4326    |
| 0.5124   | 0.9101      | G           | A              | 0.013      | 0.005    | 0.01157 | 1407    | 0.4876    |
| 0.6771   | 0.9883      | T           | C              | -0.013     | 0.005    | 0.01582 | 1407    | 0.3229    |
| 0.6448   | 0.8068      | G           | A              | 0.009      | 0.006    | 0.1004  | 1407    | 0.3552    |
| 0.4587   | 0.9886      | T           | A              | -0.008     | 0.005    | 0.09747 | 1407    | 0.4587    |
| 0.4589   | 0.9877      | G           | C              | -0.008     | 0.005    | 0.09651 | 1407    | 0.4589    |
| 0.4964   | 0.9736      | T           | A              | 0.007      | 0.005    | 0.1798  | 1407    | 0.4964    |
| 0.5951   | 0.9899      | T           | C              | -0.006     | 0.005    | 0.2174  | 1407    | 0.4049    |
| 0.5962   | 0.9931      | T           | G              | -0.006     | 0.005    | 0.2119  | 1407    | 0.4038    |
| 0.4098   | 0.9973      | G           | A              | 0.005      | 0.005    | 0.2981  | 1407    | 0.4098    |
| 0.4422   | 0.8914      | G           | C              | 0.004      | 0.005    | 0.4866  | 1407    | 0.4422    |
| 0.4023   | 0.9863      | T           | A              | 0.006      | 0.005    | 0.2277  | 1407    | 0.4023    |
| 0.5898   | 0.994       | T           | C              | -0.005     | 0.005    | 0.3145  | 1407    | 0.4102    |
| 0.5981   | 0.9864      | G           | A              | -0.006     | 0.005    | 0.2226  | 1407    | 0.4019    |
| 0.5481   | 0.9949      | T           | A              | 0.007      | 0.005    | 0.1559  | 1407    | 0.4519    |
| 0.4932   | 0.9955      | T           | C              | -0.007     | 0.005    | 0.1413  | 1407    | 0.4932    |
| 0.5977   | 0.9649      | T           | G              | -0.005     | 0.005    | 0.333   | 1407    | 0.4023    |
| 0.5023   | 0.9984      | C           | A              | -0.007     | 0.005    | 0.1735  | 1407    | 0.4977    |
| 0.4926   | 0.9748      | G           | A              | -0.007     | 0.005    | 0.1411  | 1407    | 0.4926    |
| 0.4542   | 0.9815      | T           | G              | -0.007     | 0.005    | 0.1546  | 1407    | 0.4542    |
| 0.4541   | 0.9837      | G           | A              | -0.007     | 0.005    | 0.1546  | 1407    | 0.4541    |
| 0.492    | 0.9645      | T           | C              | -0.007     | 0.005    | 0.1439  | 1407    | 0.492     |

|        |        |   |   |        |       |         |      |        |
|--------|--------|---|---|--------|-------|---------|------|--------|
| 0.4516 | 0.968  | T | G | -0.007 | 0.005 | 0.1554  | 1407 | 0.4516 |
| 0.5074 | 0.9986 | G | C | 0.008  | 0.005 | 0.1113  | 1407 | 0.4926 |
| 0.5076 | 0.9996 | C | A | 0.008  | 0.005 | 0.1096  | 1407 | 0.4924 |
| 0.4059 | 0.9871 | G | A | 0.005  | 0.005 | 0.2754  | 1407 | 0.4059 |
| 0.3703 | 0.9581 | G | C | -0.006 | 0.005 | 0.2025  | 1407 | 0.3703 |
| 0.493  | 0.9976 | T | C | -0.008 | 0.005 | 0.1147  | 1407 | 0.493  |
| 0.5068 | 0.9975 | T | G | 0.008  | 0.005 | 0.116   | 1407 | 0.4932 |
| 0.4923 | 1      | G | A | -0.008 | 0.005 | 0.109   | 1407 | 0.4923 |
| 0.4923 | 1      | G | A | -0.008 | 0.005 | 0.1092  | 1407 | 0.4923 |
| 0.6339 | 0.9    | T | A | 0.005  | 0.005 | 0.3857  | 1407 | 0.3661 |
| 0.598  | 0.9629 | T | C | -0.005 | 0.005 | 0.3478  | 1407 | 0.402  |
| 0.5889 | 0.9887 | T | C | -0.004 | 0.005 | 0.3793  | 1407 | 0.4111 |
| 0.3713 | 0.9921 | T | C | -0.01  | 0.005 | 0.06382 | 1407 | 0.3713 |
| 0.8745 | 0.9265 | T | G | -0.001 | 0.008 | 0.8782  | 1407 | 0.1255 |
| 0.4128 | 0.8858 | G | A | 0.004  | 0.005 | 0.4376  | 1407 | 0.4128 |
| 0.1273 | 0.9355 | C | A | 0.001  | 0.008 | 0.885   | 1407 | 0.1273 |
| 0.4836 | 0.9795 | G | A | -0.007 | 0.005 | 0.1942  | 1407 | 0.4836 |
| 0.484  | 0.9817 | T | A | -0.007 | 0.005 | 0.1974  | 1407 | 0.484  |
| 0.4854 | 0.9919 | G | A | -0.007 | 0.005 | 0.1434  | 1407 | 0.4854 |
| 0.5893 | 0.9949 | T | C | -0.004 | 0.005 | 0.4789  | 1407 | 0.4107 |
| 0.8078 | 0.9525 | G | A | 0.009  | 0.006 | 0.1729  | 1407 | 0.1922 |
| 0.6285 | 0.9933 | T | C | 0.01   | 0.005 | 0.05774 | 1407 | 0.3715 |
| 0.5188 | 0.9911 | T | A | 0.006  | 0.005 | 0.2253  | 1407 | 0.4812 |
| 0.1286 | 0.9454 | C | A | 0.001  | 0.008 | 0.8906  | 1407 | 0.1286 |
| 0.4842 | 0.9827 | G | C | -0.006 | 0.005 | 0.199   | 1407 | 0.4842 |
| 0.5182 | 0.9968 | G | C | 0.006  | 0.005 | 0.2152  | 1407 | 0.4818 |
| 0.5881 | 0.9929 | T | C | -0.003 | 0.005 | 0.4989  | 1407 | 0.4119 |
| 0.6287 | 0.9954 | G | A | 0.01   | 0.005 | 0.05557 | 1407 | 0.3713 |
| 0.1377 | 0.8701 | G | A | -0.001 | 0.008 | 0.9096  | 1407 | 0.1377 |
| 0.4109 | 0.9963 | G | C | 0.003  | 0.005 | 0.4895  | 1407 | 0.4109 |
| 0.4278 | 0.9961 | G | A | 0      | 0.005 | 0.9269  | 1407 | 0.4278 |
| 0.429  | 0.9873 | G | A | 0      | 0.005 | 0.9922  | 1407 | 0.429  |
| 0.514  | 0.994  | G | A | 0.005  | 0.005 | 0.2773  | 1407 | 0.486  |
| 0.5064 | 0.9642 | G | A | 0.007  | 0.005 | 0.1587  | 1407 | 0.4936 |
| 0.5144 | 0.9873 | T | C | 0.006  | 0.005 | 0.1974  | 1407 | 0.4856 |
| 0.5176 | 0.9858 | G | C | 0.006  | 0.005 | 0.2085  | 1407 | 0.4824 |
| 0.5077 | 0.9896 | G | A | 0.006  | 0.005 | 0.2211  | 1407 | 0.4923 |
| 0.244  | 0.8563 | T | C | -0.009 | 0.006 | 0.1757  | 1407 | 0.244  |
| 0.4826 | 0.9857 | G | A | -0.006 | 0.005 | 0.2048  | 1407 | 0.4826 |
| 0.3907 | 0.9894 | T | A | 0.008  | 0.005 | 0.1293  | 1407 | 0.3907 |
| 0.4864 | 0.9986 | G | A | -0.005 | 0.005 | 0.2948  | 1407 | 0.4864 |
| 0.3784 | 0.9832 | T | C | -0.002 | 0.005 | 0.7727  | 1407 | 0.3784 |
| 0.6123 | 0.9781 | G | A | -0.008 | 0.005 | 0.1446  | 1407 | 0.3877 |
| 0.3909 | 0.9817 | G | A | 0.008  | 0.005 | 0.1384  | 1407 | 0.3909 |
| 0.3906 | 0.9825 | G | A | 0.008  | 0.005 | 0.1246  | 1407 | 0.3906 |
| 0.3907 | 0.9871 | G | C | 0.008  | 0.005 | 0.1306  | 1407 | 0.3907 |
| 0.0299 | 0.7459 | G | C | -0.036 | 0.017 | 0.03782 | 1407 | 0.0299 |



|        |        |   |   |        |       |         |      |        |
|--------|--------|---|---|--------|-------|---------|------|--------|
| 0.3906 | 0.9853 | G | A | 0.008  | 0.005 | 0.1264  | 1407 | 0.3906 |
| 0.606  | 0.9575 | G | C | -0.008 | 0.005 | 0.1173  | 1407 | 0.394  |
| 0.9004 | 0.92   | T | C | 0.006  | 0.009 | 0.48    | 1407 | 0.0996 |
| 0.6364 | 0.9687 | T | C | 0.013  | 0.005 | 0.01653 | 1407 | 0.3636 |

NESDA

| af_nesda   | oevar_nesda | coded_nesda | noncoded_nesda | beta_nesda  | se_nesda   | p_nesda  | n_nesda | maf_nesda  |
|------------|-------------|-------------|----------------|-------------|------------|----------|---------|------------|
| 0.46540881 | 0.971693    | G           | A              | -0.00364498 | 0.00416633 | 0.381643 | 1612    | 0.46540881 |
| 0.46541718 | 0.971819    | C           | G              | -0.00364973 | 0.00416606 | 0.380997 | 1612    | 0.46541718 |
| 0.40694789 | 1           | G           | C              | -0.00185562 | 0.0041988  | 0.658531 | 1612    | 0.40694789 |
| 0.40888546 | 0.993784    | G           | A              | -0.00162312 | 0.00420184 | 0.699281 | 1612    | 0.40888546 |
| 0.48632321 | 0.993663    | C           | T              | -0.00508293 | 0.00408207 | 0.213064 | 1612    | 0.48632321 |
| 0.48636386 | 0.993944    | G           | A              | -0.00507875 | 0.00408154 | 0.213377 | 1612    | 0.48636386 |
| 0.48634678 | 0.993825    | G           | A              | -0.00508053 | 0.00408177 | 0.213244 | 1612    | 0.48634678 |
| 0.48636727 | 0.993971    | T           | A              | -0.00507834 | 0.00408149 | 0.213409 | 1612    | 0.48636727 |
| 0.48637038 | 0.993992    | C           | T              | -0.00507804 | 0.00408145 | 0.213436 | 1612    | 0.48637038 |
| 0.4918626  | 0.976989    | C           | T              | -0.00530053 | 0.0041191  | 0.198158 | 1612    | 0.4918626  |
| 0.49186197 | 0.976979    | C           | A              | -0.00530039 | 0.00411911 | 0.198174 | 1612    | 0.49186197 |
| 0.44843142 | 0.958411    | C           | T              | 0.00386948  | 0.00424978 | 0.362541 | 1612    | 0.44843142 |
| 0.35225456 | 0.94035     | A           | G              | -0.00144509 | 0.00440674 | 0.742962 | 1612    | 0.35225456 |
| 0.48727498 | 1           | G           | A              | -0.00497854 | 0.00407342 | 0.221632 | 1612    | 0.48727498 |
| 0.48637193 | 0.993997    | G           | A              | -0.00507756 | 0.00408144 | 0.213476 | 1612    | 0.48637193 |
| 0.48637193 | 0.993996    | C           | G              | -0.00507755 | 0.00408144 | 0.213479 | 1612    | 0.48637193 |
| 0.47213801 | 0.967259    | C           | A              | -0.00601256 | 0.00413149 | 0.14559  | 1612    | 0.47213801 |
| 0.47213832 | 0.967238    | A           | T              | -0.00601262 | 0.00413154 | 0.145587 | 1612    | 0.47213832 |
| 0.48635859 | 0.993773    | C           | T              | -0.00507423 | 0.00408188 | 0.21383  | 1612    | 0.48635859 |
| 0.48636542 | 0.993882    | C           | T              | -0.00507588 | 0.00408167 | 0.213657 | 1612    | 0.48636542 |
| 0.47252111 | 0.988101    | G           | A              | -0.00543942 | 0.00409784 | 0.18438  | 1612    | 0.47252111 |
| 0.45838509 | 1           | T           | C              | -0.00404998 | 0.00408827 | 0.321864 | 1612    | 0.45838509 |
| 0.4583978  | 0.994728    | T           | G              | -0.0041752  | 0.00409659 | 0.308109 | 1612    | 0.4583978  |
| 0.45515289 | 0.953908    | G           | A              | 0.00526904  | 0.004255   | 0.215601 | 1612    | 0.45515289 |
| 0.34088089 | 1           | C           | T              | -0.00160836 | 0.00425192 | 0.705232 | 1612    | 0.34088089 |
| 0.33293073 | 0.909614    | A           | G              | -0.00392189 | 0.00453933 | 0.387591 | 1612    | 0.33293073 |
| 0.45169259 | 0.954399    | T           | A              | -0.00333529 | 0.0041874  | 0.425737 | 1612    | 0.45169259 |
| 0.4517013  | 0.954508    | G           | C              | -0.00333348 | 0.0041872  | 0.425962 | 1612    | 0.4517013  |
| 0.4841852  | 0.990073    | A           | T              | -0.00548842 | 0.00408054 | 0.178619 | 1612    | 0.4841852  |
| 0.43854749 | 1           | C           | T              | 0.00388796  | 0.00418064 | 0.352375 | 1612    | 0.43854749 |
| 0.43798209 | 0.994125    | G           | T              | 0.00407638  | 0.00418374 | 0.329892 | 1612    | 0.43798209 |
| 0.45217391 | 1           | G           | A              | 0.00398595  | 0.00418865 | 0.341297 | 1612    | 0.45217391 |
| 0.48005954 | 0.94368     | G           | C              | 0.0050186   | 0.00429493 | 0.242609 | 1612    | 0.48005954 |
| 0.43822112 | 0.993433    | T           | A              | 0.00406778  | 0.00418317 | 0.330845 | 1612    | 0.43822112 |
| 0.451313   | 0.992712    | C           | T              | 0.00379446  | 0.00419757 | 0.366013 | 1612    | 0.451313   |
| 0.43814059 | 0.995043    | A           | G              | 0.00405289  | 0.00418101 | 0.332372 | 1612    | 0.43814059 |
| 0.44482658 | 0.950497    | A           | T              | -0.0047643  | 0.00420553 | 0.257272 | 1612    | 0.44482658 |
| 0.45934202 | 1           | T           | C              | -0.00593271 | 0.00405413 | 0.143365 | 1612    | 0.45934202 |
| 0.43935918 | 0.96884     | G           | T              | 0.00341889  | 0.00427464 | 0.423821 | 1612    | 0.43935918 |
| 0.46985699 | 0.970904    | C           | A              | -0.00640033 | 0.00411615 | 0.119965 | 1612    | 0.46985699 |
| 0.47001533 | 0.992119    | G           | A              | -0.00546821 | 0.00408401 | 0.180588 | 1612    | 0.47001533 |
| 0.44469851 | 0.950471    | T           | G              | -0.00478357 | 0.00420547 | 0.255338 | 1612    | 0.44469851 |
| 0.44473287 | 0.950452    | G           | A              | -0.00477857 | 0.00420554 | 0.255846 | 1612    | 0.44473287 |
| 0.46044933 | 0.981094    | T           | C              | -0.00460696 | 0.00411272 | 0.262634 | 1612    | 0.46044933 |
| 0.44395875 | 0.952486    | T           | G              | -0.0047709  | 0.00420301 | 0.256324 | 1612    | 0.44395875 |
| 0.4698534  | 0.992101    | C           | G              | -0.00550222 | 0.00408325 | 0.177821 | 1612    | 0.4698534  |

|            |          |   |   |             |            |           |      |            |
|------------|----------|---|---|-------------|------------|-----------|------|------------|
| 0.46985311 | 0.992105 | A | C | -0.00550205 | 0.00408324 | 0.177833  | 1612 | 0.46985311 |
| 0.43662996 | 0.991855 | G | A | 0.00418714  | 0.00419209 | 0.317881  | 1612 | 0.43662996 |
| 0.35714973 | 0.946334 | G | C | -0.00254274 | 0.00439359 | 0.562762  | 1612 | 0.35714973 |
| 0.46985433 | 0.992086 | T | C | -0.00550278 | 0.00408328 | 0.177772  | 1612 | 0.46985433 |
| 0.46985464 | 0.992077 | G | T | -0.00550311 | 0.0040833  | 0.177755  | 1612 | 0.46985464 |
| 0.4698528  | 0.992112 | G | A | -0.0055018  | 0.00408323 | 0.177842  | 1612 | 0.4698528  |
| 0.4698528  | 0.992112 | G | A | -0.00550179 | 0.00408323 | 0.177843  | 1612 | 0.4698528  |
| 0.34627916 | 0.940473 | A | T | -0.00263962 | 0.00443128 | 0.551383  | 1612 | 0.34627916 |
| 0.43846805 | 0.969096 | C | T | 0.00327542  | 0.00427481 | 0.443551  | 1612 | 0.43846805 |
| 0.44940022 | 0.994577 | C | T | 0.00370627  | 0.0041993  | 0.37746   | 1612 | 0.44940022 |
| 0.36339533 | 0.994703 | T | C | 0.00188323  | 0.00420029 | 0.653896  | 1612 | 0.36339533 |
| 0.12425786 | 0.980932 | G | T | -0.0087608  | 0.00604846 | 0.147495  | 1612 | 0.12425786 |
| 0.46356855 | 0.985998 | G | A | 0.00572466  | 0.00419897 | 0.172774  | 1612 | 0.46356855 |
| 0.12280702 | 1        | C | A | -0.00819891 | 0.0060495  | 0.175321  | 1612 | 0.12280702 |
| 0.45866375 | 0.985546 | G | A | -0.00613478 | 0.00410022 | 0.134602  | 1612 | 0.45866375 |
| 0.45866375 | 0.985545 | T | A | -0.00613476 | 0.00410023 | 0.134602  | 1612 | 0.45866375 |
| 0.46227885 | 0.990477 | G | A | -0.00344849 | 0.00409752 | 0.40001   | 1612 | 0.46227885 |
| 0.44619693 | 0.986835 | C | T | 0.00344988  | 0.00421984 | 0.413624  | 1612 | 0.44619693 |
| 0.17207379 | 1        | A | G | -0.0107712  | 0.00528017 | 0.0413563 | 1612 | 0.17207379 |
| 0.36379134 | 0.994318 | C | T | 0.00190236  | 0.00420126 | 0.650693  | 1612 | 0.36379134 |
| 0.46179805 | 0.98697  | A | T | -0.00352669 | 0.00410336 | 0.390089  | 1612 | 0.46179805 |
| 0.12310367 | 0.970818 | C | A | -0.00820939 | 0.0060995  | 0.17833   | 1612 | 0.12310367 |
| 0.45866375 | 0.985531 | G | C | -0.00613476 | 0.00410025 | 0.134605  | 1612 | 0.45866375 |
| 0.45866437 | 0.985487 | C | G | -0.00613489 | 0.00410034 | 0.134607  | 1612 | 0.45866437 |
| 0.44611104 | 0.982433 | C | T | 0.00346548  | 0.00422597 | 0.412187  | 1612 | 0.44611104 |
| 0.36290416 | 0.983552 | A | G | 0.00193309  | 0.00422706 | 0.647443  | 1612 | 0.36290416 |
| 0.13412024 | 0.874686 | G | A | -0.0117459  | 0.00619443 | 0.0579326 | 1612 | 0.13412024 |
| 0.4461383  | 0.983722 | G | C | 0.00346086  | 0.00422425 | 0.412626  | 1612 | 0.4461383  |
| 0.4185047  | 0.996382 | G | A | -0.00353274 | 0.00416261 | 0.39606   | 1612 | 0.4185047  |
| 0.41820724 | 0.996293 | G | A | -0.00350373 | 0.00416633 | 0.400369  | 1612 | 0.41820724 |
| 0.46702725 | 0.984582 | A | G | -0.00305485 | 0.00410718 | 0.457004  | 1612 | 0.46702725 |
| 0.47423418 | 0.968306 | A | G | -0.0029966  | 0.00414103 | 0.469294  | 1612 | 0.47423418 |
| 0.47041985 | 1        | C | T | -0.00300003 | 0.00416892 | 0.47176   | 1612 | 0.47041985 |
| 0.46196958 | 0.989026 | C | G | -0.00349078 | 0.00409975 | 0.394515  | 1612 | 0.46196958 |
| 0.4772168  | 0.977349 | A | G | -0.00235479 | 0.00415075 | 0.570501  | 1612 | 0.4772168  |
| 0.26330798 | 1        | T | C | -0.00261836 | 0.00464875 | 0.573273  | 1612 | 0.26330798 |
| 0.46206948 | 0.990479 | G | A | -0.00346888 | 0.00409716 | 0.397189  | 1612 | 0.46206948 |
| 0.42324425 | 1        | T | A | 0.00365438  | 0.004175   | 0.38141   | 1612 | 0.42324425 |
| 0.46301887 | 0.969831 | G | A | -0.00299547 | 0.00413494 | 0.468805  | 1612 | 0.46301887 |
| 0.4016451  | 0.918573 | T | C | -0.00307281 | 0.00424024 | 0.468645  | 1612 | 0.4016451  |
| 0.4222208  | 0.984295 | A | G | 0.00337048  | 0.00420717 | 0.423053  | 1612 | 0.4222208  |
| 0.42333193 | 0.99483  | G | A | 0.00346654  | 0.00418183 | 0.407131  | 1612 | 0.42333193 |
| 0.42316344 | 0.995808 | G | A | 0.00345157  | 0.00417921 | 0.408869  | 1612 | 0.42316344 |
| 0.42326828 | 0.995508 | G | C | 0.00345981  | 0.00418018 | 0.407861  | 1612 | 0.42326828 |
| 0.42314674 | 0.996062 | G | A | 0.0034434   | 0.00417877 | 0.409931  | 1612 | 0.42314674 |
| 0.40027978 | 0.842307 | C | G | 0.00495077  | 0.00451507 | 0.272863  | 1612 | 0.40027978 |
| 0.11309117 | 0.94838  | C | T | -0.00937341 | 0.00643155 | 0.14501   | 1612 | 0.11309117 |
| 0.35357125 | 0.811326 | C | T | -0.00364625 | 0.00463303 | 0.431275  | 1612 | 0.35357125 |

NBS

| af_nij     | oevar_nij | coded_nij | noncoded_nij | beta_nij    | se_nij     | p_nij    | n_nij | maf_nij    |
|------------|-----------|-----------|--------------|-------------|------------|----------|-------|------------|
| 0.45825427 | 0.984754  | G         | A            | 0.00148322  | 0.00617125 | 0.810248 | 527   | 0.45825427 |
| 0.54174573 | 0.984789  | G         | C            | -0.00147869 | 0.00617091 | 0.810431 | 527   | 0.458254   |
| 0.41340782 | 0.996125  | G         | C            | 0.00483875  | 0.00624649 | 0.438324 | 537   | 0.41340782 |
| 0.41340782 | 0.996218  | G         | A            | 0.00482706  | 0.00624575 | 0.439646 | 537   | 0.41340782 |
| 0.51301115 | 0.995284  | T         | C            | 0.00036301  | 0.00637473 | 0.953903 | 538   | 0.486989   |
| 0.48618785 | 1         | G         | A            | -0.00074251 | 0.0063831  | 0.907396 | 543   | 0.48618785 |
| 0.48698885 | 0.995284  | G         | A            | -0.00036301 | 0.00637473 | 0.955236 | 538   | 0.48698885 |
| 0.48698885 | 0.995284  | T         | A            | -0.00036347 | 0.0063746  | 0.954804 | 538   | 0.48698885 |
| 0.51301115 | 0.995273  | T         | C            | 0.00036069  | 0.0063745  | 0.954241 | 538   | 0.486989   |
| 0.50194553 | 0.947626  | T         | C            | 0.00075124  | 0.00653716 | 0.906068 | 514   | 0.498054   |
| 0.49805447 | 0.947534  | C         | A            | -0.00074428 | 0.00653734 | 0.912869 | 514   | 0.49805447 |
| 0.53240741 | 0.997515  | T         | C            | 0.00092474  | 0.00592598 | 0.876032 | 540   | 0.467593   |
| 0.66385768 | 0.996208  | G         | A            | 0.00163142  | 0.00656026 | 0.805108 | 534   | 0.336142   |
| 0.48698885 | 0.995239  | G         | A            | -0.00035673 | 0.00637449 | 0.955478 | 538   | 0.48698885 |
| 0.48698885 | 0.995239  | G         | A            | -0.00035673 | 0.00637449 | 0.955478 | 538   | 0.48698885 |
| 0.51301115 | 0.995239  | G         | C            | 0.00035673  | 0.00637449 | 0.955259 | 538   | 0.486989   |
| 0.4766537  | 0.957483  | C         | A            | 0.00010434  | 0.00649609 | 0.98282  | 514   | 0.4766537  |
| 0.5233463  | 0.957472  | T         | A            | -0.00010657 | 0.00649598 | 0.991958 | 514   | 0.476654   |
| 0.51301115 | 0.994788  | T         | C            | 0.00033603  | 0.00637527 | 0.958667 | 538   | 0.486989   |
| 0.51301115 | 0.994902  | T         | C            | 0.00034368  | 0.00637569 | 0.956898 | 538   | 0.486989   |
| 0.46993988 | 0.957617  | G         | A            | 9.25E-05    | 0.00645856 | 0.98815  | 499   | 0.46993988 |
| 0.45664207 | 0.998999  | T         | C            | 0.00186096  | 0.00620334 | 0.764183 | 542   | 0.45664207 |
| 0.45488029 | 1         | T         | G            | 0.00218744  | 0.00621524 | 0.724878 | 543   | 0.45488029 |
| 0.47180451 | 0.99634   | G         | A            | 4.01E-05    | 0.00592141 | 0.994163 | 532   | 0.47180451 |
| 0.49722736 | 1         | G         | A            | 0.00194942  | 0.00594751 | 0.743085 | 541   | 0.49722736 |
| 0.66795367 | 0.975209  | T         | C            | -0.0021921  | 0.00672948 | 0.744932 | 518   | 0.332046   |
| 0.67625232 | 1         | G         | A            | 0.00314993  | 0.00662684 | 0.634552 | 539   | 0.323748   |
| 0.43761639 | 0.997274  | T         | A            | 0.00059236  | 0.00598706 | 0.921134 | 537   | 0.43761639 |
| 0.43866171 | 0.997315  | G         | C            | 0.00059079  | 0.00598684 | 0.921422 | 538   | 0.43866171 |
| 0.5259481  | 0.95932   | T         | A            | 0.00032921  | 0.00644233 | 0.960016 | 501   | 0.474052   |
| 0.54704797 | 0.998527  | T         | C            | 0.00294295  | 0.00592023 | 0.620039 | 542   | 0.452952   |
| 0.546875   | 0.999291  | T         | G            | 0.00295493  | 0.00593417 | 0.619443 | 544   | 0.453125   |
| 0.46494465 | 0.999212  | G         | A            | -0.00290239 | 0.00592788 | 0.624782 | 542   | 0.46494465 |
| 0.49238095 | 0.988323  | G         | C            | -2.49E-05   | 0.00595735 | 0.99868  | 525   | 0.49238095 |
| 0.45378928 | 0.99801   | T         | A            | -0.00297545 | 0.00593843 | 0.615944 | 541   | 0.45378928 |
| 0.53406998 | 1         | T         | C            | 0.00254301  | 0.00594724 | 0.668946 | 543   | 0.46593    |
| 0.546875   | 0.998579  | G         | A            | 0.00296675  | 0.00593653 | 0.618494 | 544   | 0.453125   |
| 0.56685499 | 0.996427  | T         | A            | 0.00031659  | 0.00597149 | 0.957718 | 531   | 0.433145   |
| 0.45664207 | 0.998979  | T         | C            | 0.00185821  | 0.0062034  | 0.764807 | 542   | 0.45664207 |
| 0.53531599 | 0.999323  | T         | G            | 0.00287307  | 0.0059332  | 0.628132 | 538   | 0.464684   |
| 0.47       | 0.947314  | C         | A            | 9.83E-05    | 0.00648741 | 0.984125 | 500   | 0.47       |
| 0.45664207 | 0.998999  | G         | A            | 0.00186088  | 0.00620321 | 0.764187 | 542   | 0.45664207 |
| 0.43301887 | 0.996282  | T         | G            | -0.00028677 | 0.00597232 | 0.961174 | 530   | 0.43301887 |
| 0.43301887 | 0.99634   | G         | A            | -0.00029182 | 0.00597201 | 0.960806 | 530   | 0.43301887 |
| 0.45664207 | 0.998999  | T         | C            | 0.00186088  | 0.00620321 | 0.764187 | 542   | 0.45664207 |

|            |          |   |   |             |            |           |     |            |
|------------|----------|---|---|-------------|------------|-----------|-----|------------|
| 0.43045113 | 0.996451 | T | G | -0.0002283  | 0.00596214 | 0.969354  | 532 | 0.43045113 |
| 0.54335793 | 0.998578 | G | C | -0.00184225 | 0.00620522 | 0.766552  | 542 | 0.456642   |
| 0.54335793 | 0.998578 | C | A | -0.00184225 | 0.00620522 | 0.766552  | 542 | 0.456642   |
| 0.44944853 | 1        | G | A | -0.00263611 | 0.00587942 | 0.653892  | 544 | 0.44944853 |
| 0.34116541 | 0.995762 | G | C | -0.00377765 | 0.00642383 | 0.55642   | 532 | 0.34116541 |
| 0.45664207 | 0.99849  | T | C | 0.00183331  | 0.00620566 | 0.767669  | 542 | 0.45664207 |
| 0.54335793 | 0.998359 | T | G | -0.00182445 | 0.00620646 | 0.769078  | 542 | 0.456642   |
| 0.45664207 | 0.998679 | G | A | 0.00184825  | 0.00620477 | 0.765798  | 542 | 0.45664207 |
| 0.45664207 | 0.998679 | G | A | 0.00184825  | 0.00620477 | 0.765798  | 542 | 0.45664207 |
| 0.66698473 | 0.985361 | T | A | 0.00368344  | 0.00655837 | 0.571905  | 524 | 0.333015   |
| 0.53531599 | 0.998973 | T | C | 0.00285741  | 0.00593197 | 0.629788  | 538 | 0.464684   |
| 0.53531599 | 0.997612 | T | C | 0.00273246  | 0.00590769 | 0.643726  | 538 | 0.464684   |
| 0.36832061 | 0.976354 | T | C | -0.00087591 | 0.00652769 | 0.894169  | 524 | 0.36832061 |
| 0.87775735 | 1        | T | G | 0.0118556   | 0.009584   | 0.216081  | 544 | 0.122243   |
| 0.48154982 | 1        | G | A | -0.00187878 | 0.00590897 | 0.75052   | 542 | 0.48154982 |
| 0.12224265 | 0.997486 | C | A | -0.0118691  | 0.00958849 | 0.215774  | 544 | 0.12224265 |
| 0.46319018 | 0.941521 | G | A | -0.00059776 | 0.00647569 | 0.929568  | 489 | 0.46319018 |
| 0.46319018 | 0.941521 | T | A | -0.00059776 | 0.00647569 | 0.929568  | 489 | 0.46319018 |
| 0.45404412 | 0.999295 | G | A | 0.0026037   | 0.0060045  | 0.664585  | 544 | 0.45404412 |
| 0.5380334  | 0.997256 | T | C | 0.0028188   | 0.00589522 | 0.631544  | 539 | 0.461967   |
| 0.84579439 | 0.987608 | G | A | 0.0188647   | 0.00861777 | 0.0285009 | 535 | 0.154206   |
| 0.63167939 | 0.97581  | T | C | 0.00084733  | 0.00652806 | 0.900391  | 524 | 0.368321   |
| 0.5494403  | 0.997345 | T | A | -0.00270701 | 0.00601306 | 0.651753  | 536 | 0.45056    |
| 0.12224265 | 0.994657 | C | A | -0.0119302  | 0.00959704 | 0.213607  | 544 | 0.12224265 |
| 0.46319018 | 0.941521 | G | C | -0.00059776 | 0.00647569 | 0.929568  | 489 | 0.46319018 |
| 0.53680982 | 0.941521 | G | C | 0.00059776  | 0.00647569 | 0.922797  | 489 | 0.46319    |
| 0.53810409 | 0.996338 | T | C | 0.00281686  | 0.00589785 | 0.633258  | 538 | 0.461896   |
| 0.62065637 | 0.970023 | G | A | 0.00043608  | 0.00653312 | 0.949437  | 518 | 0.379344   |
| 0.12524272 | 0.919777 | G | A | -0.0124523  | 0.00969249 | 0.198646  | 515 | 0.12524272 |
| 0.46189591 | 0.996828 | G | C | -0.00280012 | 0.00589642 | 0.634815  | 538 | 0.46189591 |
| 0.39430147 | 1        | G | A | -0.00785967 | 0.00627194 | 0.210152  | 544 | 0.39430147 |
| 0.39430147 | 1        | G | A | -0.00785967 | 0.00627194 | 0.210152  | 544 | 0.39430147 |
| 0.54267161 | 0.996842 | G | A | -0.00242388 | 0.00593935 | 0.681624  | 539 | 0.457328   |
| 0.55606618 | 1        | G | A | -0.00282291 | 0.00601544 | 0.638871  | 544 | 0.443934   |
| 0.5464684  | 0.997615 | T | C | -0.00237992 | 0.00596322 | 0.689756  | 538 | 0.453532   |
| 0.54805915 | 0.997992 | G | C | -0.00267345 | 0.00601031 | 0.656114  | 541 | 0.451941   |
| 0.53584559 | 1        | G | A | -0.00470841 | 0.00591635 | 0.42613   | 544 | 0.464154   |
| 0.24372385 | 0.912671 | T | C | -0.00026907 | 0.0074579  | 0.970053  | 478 | 0.24372385 |
| 0.45395948 | 0.998344 | G | A | 0.00264858  | 0.00600832 | 0.659307  | 543 | 0.45395948 |
| 0.43081181 | 0.999772 | T | A | -0.00424698 | 0.00598404 | 0.47788   | 542 | 0.43081181 |
| 0.4447619  | 0.986338 | G | A | 0.00289283  | 0.00601579 | 0.629495  | 525 | 0.4447619  |
| 0.37947269 | 0.994339 | T | C | 0.00202062  | 0.00618875 | 0.744048  | 531 | 0.37947269 |
| 0.56754221 | 0.996371 | G | A | 0.00445353  | 0.00598412 | 0.456832  | 533 | 0.432458   |
| 0.43081181 | 0.999542 | G | A | -0.00426635 | 0.0059841  | 0.475999  | 542 | 0.43081181 |
| 0.43186004 | 1        | G | A | -0.00455285 | 0.00600495 | 0.448341  | 543 | 0.43186004 |
| 0.43081181 | 0.99972  | G | C | -0.00425152 | 0.00598418 | 0.477436  | 542 | 0.43081181 |
| 0.01886792 | 0.88365  | G | C | -0.00787422 | 0.0207814  | 0.704733  | 530 | 0.01886792 |

|            |          |   |   |             |            |          |     |            |
|------------|----------|---|---|-------------|------------|----------|-----|------------|
| 0.43081181 | 0.999772 | G | A | -0.00424698 | 0.00598404 | 0.47788  | 542 | 0.43081181 |
| 0.64340102 | 0.84269  | G | C | 0.00213481  | 0.00668969 | 0.751868 | 394 | 0.356599   |
| 0.89408397 | 0.985945 | T | C | 0.0119016   | 0.00983129 | 0.227288 | 524 | 0.105916   |
| 0.65508021 | 0.858921 | T | C | -0.00393181 | 0.00675505 | 0.551012 | 374 | 0.34492    |

Rotterdam Study

| af_rott  | oevar_rott | coded_rott | noncoded_rott | beta_rott   | se_rott    | p_rott     | n_rott | maf_rott |
|----------|------------|------------|---------------|-------------|------------|------------|--------|----------|
| 0.464583 | 0.975397   | G          | A             | -0.0062218  | 0.00384133 | 0.10527406 | 5169   | 0.464583 |
| 0.464599 | 0.975617   | C          | G             | -0.00624191 | 0.00384075 | 0.10410128 | 5169   | 0.464599 |
| 0.584212 | 0.995835   | C          | G             | 0.00356825  | 0.00387065 | 0.35652094 | 5169   | 0.415788 |
| 0.584053 | 0.996161   | A          | G             | 0.00355522  | 0.0038699  | 0.35818694 | 5169   | 0.415947 |
| 0.483684 | 0.989937   | C          | T             | -0.00779184 | 0.00381492 | 0.04110721 | 5169   | 0.483684 |
| 0.488885 | 0.999582   | G          | A             | -0.0072542  | 0.0037928  | 0.05579221 | 5169   | 0.488885 |
| 0.488682 | 0.998733   | G          | A             | -0.00727865 | 0.00379449 | 0.05508008 | 5169   | 0.488682 |
| 0.488534 | 0.998581   | T          | A             | -0.00728178 | 0.00379407 | 0.05494844 | 5169   | 0.488534 |
| 0.487831 | 0.998822   | C          | T             | -0.00731994 | 0.00379215 | 0.05356769 | 5169   | 0.487831 |
| 0.49373  | 0.976933   | C          | T             | -0.00739168 | 0.00383192 | 0.05373057 | 5169   | 0.49373  |
| 0.493713 | 0.976805   | C          | A             | -0.00738675 | 0.00383217 | 0.05390625 | 5169   | 0.493713 |
| 0.55782  | 0.973453   | T          | C             | -0.00070363 | 0.00386787 | 0.85562132 | 5169   | 0.44218  |
| 0.351445 | 0.957304   | A          | G             | -0.00296968 | 0.00407763 | 0.46636396 | 5169   | 0.351445 |
| 0.487799 | 0.998606   | G          | A             | -0.00731434 | 0.00379253 | 0.053775   | 5169   | 0.487799 |
| 0.487769 | 0.998387   | G          | A             | -0.00730683 | 0.00379289 | 0.05404431 | 5169   | 0.487769 |
| 0.487736 | 0.998172   | C          | G             | -0.00730062 | 0.00379328 | 0.05427373 | 5169   | 0.487736 |
| 0.477094 | 0.921396   | C          | A             | -0.00766627 | 0.00395385 | 0.05250608 | 5169   | 0.477094 |
| 0.477081 | 0.920495   | A          | T             | -0.00767008 | 0.00395568 | 0.05249792 | 5169   | 0.477081 |
| 0.487483 | 0.996492   | C          | T             | -0.00724668 | 0.00379638 | 0.05627868 | 5169   | 0.487483 |
| 0.487563 | 0.997015   | C          | T             | -0.00726394 | 0.00379538 | 0.05563004 | 5169   | 0.487563 |
| 0.473009 | 0.979077   | G          | A             | -0.00733977 | 0.00384077 | 0.05599856 | 5169   | 0.473009 |
| 0.458239 | 0.998612   | T          | C             | -0.00681728 | 0.0038045  | 0.07313851 | 5169   | 0.458239 |
| 0.458317 | 0.998812   | T          | G             | -0.00684281 | 0.003804   | 0.07203236 | 5169   | 0.458317 |
| 0.553979 | 0.971172   | A          | G             | -0.00118146 | 0.00386852 | 0.76001472 | 5169   | 0.446021 |
| 0.517925 | 0.993687   | G          | A             | 0.00570184  | 0.0038569  | 0.13928053 | 5169   | 0.482075 |
| 0.665569 | 0.999744   | T          | C             | -0.00427619 | 0.00399781 | 0.28471819 | 5169   | 0.334431 |
| 0.333348 | 0.929186   | A          | G             | -0.0042799  | 0.00419945 | 0.30805882 | 5169   | 0.333348 |
| 0.452536 | 0.972188   | T          | A             | 0.00180156  | 0.00388385 | 0.64268789 | 5169   | 0.452536 |
| 0.452486 | 0.972506   | G          | C             | 0.00178755  | 0.00388335 | 0.64523238 | 5169   | 0.452486 |
| 0.482296 | 0.983227   | A          | T             | -0.00731517 | 0.00382446 | 0.05577781 | 5169   | 0.482296 |
| 0.568183 | 0.996129   | T          | C             | -0.00111709 | 0.00383483 | 0.77077764 | 5169   | 0.431817 |
| 0.56793  | 0.998727   | T          | G             | -0.00121311 | 0.00382897 | 0.75133099 | 5169   | 0.43207  |
| 0.55663  | 0.996553   | A          | G             | -0.00158159 | 0.00383516 | 0.67999541 | 5169   | 0.44337  |
| 0.532004 | 0.955      | C          | G             | -0.00183377 | 0.00390904 | 0.6389287  | 5169   | 0.467996 |
| 0.569979 | 0.997478   | A          | T             | -0.00068313 | 0.00383183 | 0.85847811 | 5169   | 0.430021 |
| 0.556507 | 0.999471   | T          | C             | -0.00165538 | 0.00382901 | 0.66544716 | 5169   | 0.443493 |
| 0.56989  | 0.997682   | G          | A             | -0.00071414 | 0.00383143 | 0.8521104  | 5169   | 0.43011  |
| 0.449666 | 0.966873   | A          | T             | 0.00146798  | 0.00389673 | 0.70632839 | 5169   | 0.449666 |
| 0.465654 | 0.979408   | T          | C             | -0.00707687 | 0.0038465  | 0.06578659 | 5169   | 0.465654 |
| 0.556593 | 0.998924   | T          | G             | -0.00170254 | 0.00383058 | 0.65665044 | 5169   | 0.443407 |
| 0.472174 | 0.893183   | C          | A             | -0.00770004 | 0.00401641 | 0.05521537 | 5169   | 0.472174 |
| 0.465393 | 0.977333   | G          | A             | -0.00709026 | 0.00385053 | 0.06555914 | 5169   | 0.465393 |
| 0.449776 | 0.966551   | T          | G             | 0.00149872  | 0.00389725 | 0.70051179 | 5169   | 0.449776 |
| 0.449743 | 0.966644   | G          | A             | 0.00149014  | 0.00389709 | 0.70213246 | 5169   | 0.449743 |
| 0.464194 | 0.970138   | T          | C             | -0.00713989 | 0.00386462 | 0.06466712 | 5169   | 0.464194 |

|          |          |   |   |             |            |            |      |          |
|----------|----------|---|---|-------------|------------|------------|------|----------|
| 0.449302 | 0.966437 | T | G | 0.00141958  | 0.00389858 | 0.71571342 | 5169 | 0.449302 |
| 0.466893 | 0.990165 | C | G | -0.0070277  | 0.0038254  | 0.06618455 | 5169 | 0.466893 |
| 0.466847 | 0.990406 | A | C | -0.00701556 | 0.00382507 | 0.06663077 | 5169 | 0.466847 |
| 0.568967 | 0.998792 | A | G | -0.00143739 | 0.00383078 | 0.7074434  | 5169 | 0.431033 |
| 0.360914 | 0.961208 | G | C | -0.00234904 | 0.00404595 | 0.56144759 | 5169 | 0.360914 |
| 0.467049 | 0.989381 | T | C | -0.00706694 | 0.00382651 | 0.0647628  | 5169 | 0.467049 |
| 0.467091 | 0.989165 | G | T | -0.00707808 | 0.00382681 | 0.06436343 | 5169 | 0.467091 |
| 0.466824 | 0.990518 | G | A | -0.00700985 | 0.0038249  | 0.06684108 | 5169 | 0.466824 |
| 0.466791 | 0.990697 | G | A | -0.00700191 | 0.00382467 | 0.0671332  | 5169 | 0.466791 |
| 0.350803 | 0.945963 | A | T | -0.00285839 | 0.00412229 | 0.48798554 | 5169 | 0.350803 |
| 0.557488 | 0.996489 | T | C | -0.00157952 | 0.00383398 | 0.68029851 | 5169 | 0.442512 |
| 0.557864 | 0.996724 | T | C | -0.00164435 | 0.00383449 | 0.66798854 | 5169 | 0.442136 |
| 0.378201 | 0.998692 | T | C | -0.00536299 | 0.00391734 | 0.17094346 | 5169 | 0.378201 |
| 0.871735 | 0.999992 | T | G | 0.00775369  | 0.00570341 | 0.17394864 | 5169 | 0.128265 |
| 0.545898 | 0.998405 | A | G | -0.00136893 | 0.00383203 | 0.72086753 | 5169 | 0.454102 |
| 0.871734 | 0.999992 | A | C | 0.0077538   | 0.00570342 | 0.17394282 | 5169 | 0.128266 |
| 0.462009 | 0.888256 | G | A | -0.00803149 | 0.00402046 | 0.04575423 | 5169 | 0.462009 |
| 0.461965 | 0.883765 | T | A | -0.00805124 | 0.00403037 | 0.04575558 | 5169 | 0.461965 |
| 0.462063 | 0.998608 | G | A | 0.00115867  | 0.003836   | 0.76256891 | 5169 | 0.462063 |
| 0.557194 | 0.987588 | T | C | -0.00241727 | 0.00383927 | 0.52887326 | 5169 | 0.442806 |
| 0.823665 | 0.999836 | G | A | 0.00854046  | 0.00498245 | 0.08649262 | 5169 | 0.176335 |
| 0.377958 | 0.999155 | C | T | -0.00509551 | 0.00391777 | 0.19334017 | 5169 | 0.377958 |
| 0.464761 | 0.995693 | A | T | 0.00177652  | 0.00383517 | 0.64314771 | 5169 | 0.464761 |
| 0.871734 | 0.99999  | A | C | 0.00775358  | 0.00570341 | 0.17395446 | 5169 | 0.128266 |
| 0.461952 | 0.882334 | G | C | -0.00805321 | 0.00403347 | 0.04586897 | 5169 | 0.461952 |
| 0.461895 | 0.877154 | C | G | -0.00807279 | 0.00404502 | 0.04596218 | 5169 | 0.461895 |
| 0.557249 | 0.987158 | T | C | -0.002381   | 0.00383979 | 0.53512933 | 5169 | 0.442751 |
| 0.377229 | 0.994349 | A | G | -0.00528464 | 0.00392814 | 0.17847225 | 5169 | 0.377229 |
| 0.860267 | 0.9176   | A | G | 0.00770625  | 0.00574192 | 0.17951556 | 5169 | 0.139733 |
| 0.557215 | 0.987397 | C | G | -0.00240511 | 0.0038395  | 0.53097356 | 5169 | 0.442785 |
| 0.418045 | 0.999697 | G | A | -0.00250572 | 0.00385213 | 0.51531235 | 5169 | 0.418045 |
| 0.418678 | 0.999895 | G | A | -0.00251322 | 0.00385025 | 0.51385107 | 5169 | 0.418678 |
| 0.467949 | 0.988571 | A | G | 0.00081232  | 0.00383591 | 0.83225743 | 5169 | 0.467949 |
| 0.46185  | 0.999259 | A | G | 0.00109171  | 0.00383537 | 0.775876   | 5169 | 0.46185  |
| 0.463434 | 0.995756 | C | T | 0.00117277  | 0.00383622 | 0.7597825  | 5169 | 0.463434 |
| 0.464445 | 0.997807 | C | G | 0.00170291  | 0.00383184 | 0.65668702 | 5169 | 0.464445 |
| 0.477854 | 0.996228 | A | G | -0.00051896 | 0.00381664 | 0.89182215 | 5169 | 0.477854 |
| 0.743318 | 0.999471 | C | T | -0.00021943 | 0.00431823 | 0.95946623 | 5169 | 0.256682 |
| 0.464363 | 0.998439 | G | A | 0.00168212  | 0.00383087 | 0.66053365 | 5169 | 0.464363 |
| 0.415818 | 0.997987 | T | A | 0.0009358   | 0.00385118 | 0.80797623 | 5169 | 0.415818 |
| 0.463985 | 0.977887 | G | A | 0.00085479  | 0.003862   | 0.82480009 | 5169 | 0.463985 |
| 0.603234 | 0.994256 | C | T | 0.0114317   | 0.00389272 | 0.00332455 | 5169 | 0.396766 |
| 0.583851 | 0.993373 | G | A | -0.00105243 | 0.00385864 | 0.78500758 | 5169 | 0.416149 |
| 0.416001 | 0.99687  | G | A | 0.00095535  | 0.00385258 | 0.80411709 | 5169 | 0.416001 |
| 0.415652 | 0.999052 | G | A | 0.00091802  | 0.00384982 | 0.81148982 | 5169 | 0.415652 |
| 0.415868 | 0.997675 | G | C | 0.0009411   | 0.00385158 | 0.80693112 | 5169 | 0.415868 |
| 0.970674 | 0.88263  | C | G | 0.00456312  | 0.0118828  | 0.70091669 | 5169 | 0.029326 |



|          |          |   |   |             |            |            |      |          |
|----------|----------|---|---|-------------|------------|------------|------|----------|
| 0.415685 | 0.998825 | G | A | 0.00092143  | 0.00385008 | 0.81081577 | 5169 | 0.415685 |
| 0.614657 | 0.829946 | G | C | -0.00166939 | 0.00427054 | 0.69581141 | 5169 | 0.385343 |
| 0.891477 | 0.98329  | T | C | 0.0101947   | 0.00615317 | 0.09753467 | 5169 | 0.108523 |
| 0.380196 | 0.817464 | C | T | -0.0085947  | 0.00432185 | 0.04673787 | 5169 | 0.380196 |

## SHIP

| af_ship    | oevar_ship | coded_ship | noncoded_ship | beta_ship   | se_ship    | p_ship    | n_ship | maf_ship   |
|------------|------------|------------|---------------|-------------|------------|-----------|--------|------------|
| 0.459686   | 0.986475   | G          | A             | -0.0109506  | 0.00759535 | 0.149372  | 543    | 0.459686   |
| 0.53622652 | 0.944519   | G          | C             | 0.0113383   | 0.00775203 | 0.14357   | 543    | 0.463773   |
| 0.42077293 | 0.978388   | G          | C             | -0.0103203  | 0.00770528 | 0.180447  | 543    | 0.42077293 |
| 0.42080884 | 0.978243   | G          | A             | -0.0103426  | 0.00770588 | 0.17954   | 543    | 0.42080884 |
| 0.51883425 | 0.973215   | T          | C             | 0.0107815   | 0.00774395 | 0.163846  | 543    | 0.481166   |
| 0.48113168 | 0.973312   | G          | A             | -0.0107783  | 0.00774331 | 0.163936  | 543    | 0.48113168 |
| 0.48114457 | 0.973268   | G          | A             | -0.0107797  | 0.00774363 | 0.163898  | 543    | 0.48114457 |
| 0.48112615 | 0.973318   | T          | A             | -0.0107776  | 0.00774327 | 0.163964  | 543    | 0.48112615 |
| 0.51887753 | 0.973328   | T          | C             | 0.0107779   | 0.00774319 | 0.163948  | 543    | 0.481122   |
| 0.51775691 | 0.969361   | T          | C             | 0.0107533   | 0.00775465 | 0.165536  | 543    | 0.482243   |
| 0.48224217 | 0.969375   | C          | A             | -0.0107543  | 0.00775452 | 0.165488  | 543    | 0.48224217 |
| 0.55870074 | 0.995808   | T          | C             | -0.0111998  | 0.00786546 | 0.154469  | 543    | 0.441299   |
| 0.63335912 | 0.986561   | G          | A             | 0.00510464  | 0.00797095 | 0.521909  | 543    | 0.366641   |
| 0.48112339 | 0.973331   | G          | A             | -0.0107772  | 0.00774318 | 0.163974  | 543    | 0.48112339 |
| 0.48111971 | 0.973348   | G          | A             | -0.010777   | 0.00774307 | 0.163976  | 543    | 0.48111971 |
| 0.51887937 | 0.973348   | G          | C             | 0.0107767   | 0.00774307 | 0.163986  | 543    | 0.481121   |
| 0.47749816 | 0.991734   | C          | A             | -0.0120101  | 0.00776407 | 0.121892  | 543    | 0.47749816 |
| 0.5224954  | 0.991775   | T          | A             | 0.0120109   | 0.00776403 | 0.121865  | 543    | 0.477505   |
| 0.51894843 | 0.97358    | T          | C             | 0.0107706   | 0.00774154 | 0.164142  | 543    | 0.481052   |
| 0.51891344 | 0.973463   | T          | C             | 0.0107738   | 0.0077423  | 0.16406   | 543    | 0.481087   |
| 0.47296869 | 0.939647   | G          | A             | -0.0120372  | 0.00781749 | 0.123614  | 543    | 0.47296869 |
| 0.45464088 | 0.993633   | T          | C             | -0.0120655  | 0.00765034 | 0.114768  | 543    | 0.45464088 |
| 0.44805157 | 0.983274   | T          | G             | -0.0116322  | 0.00768985 | 0.130363  | 543    | 0.44805157 |
| 0.448907   | 0.994173   | G          | A             | 0.0104555   | 0.00781975 | 0.1812    | 543    | 0.448907   |
| 0.52776519 | 0.167303   | G          | A             | -0.00196393 | 0.0185514  | 0.91569   | 543    | 0.472235   |
| 0.65126796 | 0.993325   | T          | C             | -0.0103311  | 0.00792857 | 0.192567  | 543    | 0.348732   |
| 0.64657827 | 0.947161   | G          | A             | 0.00041351  | 0.00827237 | 0.960133  | 543    | 0.353422   |
| 0.46497053 | 0.995873   | T          | A             | -0.00923825 | 0.00797478 | 0.246687  | 543    | 0.46497053 |
| 0.46497238 | 0.995857   | G          | C             | -0.00923757 | 0.0079748  | 0.246723  | 543    | 0.46497238 |
| 0.5302081  | 0.977881   | T          | A             | 0.0111221   | 0.00768731 | 0.147951  | 543    | 0.469792   |
| 0.56971363 | 0.992749   | T          | C             | -0.0132359  | 0.00785264 | 0.0918858 | 543    | 0.430286   |
| 0.57102486 | 0.993873   | T          | G             | -0.012138   | 0.00784679 | 0.121893  | 543    | 0.428975   |
| 0.44087201 | 0.996213   | G          | A             | 0.0118147   | 0.00795893 | 0.137689  | 543    | 0.44087201 |
| 0.46384807 | 0.963607   | G          | C             | 0.00896057  | 0.00820423 | 0.27475   | 543    | 0.46384807 |
| 0.42659042 | 0.997072   | T          | A             | 0.0134643   | 0.00786656 | 0.0869739 | 543    | 0.42659042 |
| 0.56332689 | 0.992758   | T          | C             | -0.0106475  | 0.00793568 | 0.179684  | 543    | 0.436673   |
| 0.57294199 | 0.996012   | G          | A             | -0.0134089  | 0.00786356 | 0.0881584 | 543    | 0.427058   |
| 0.54107827 | 0.996873   | T          | A             | 0.00868325  | 0.00795221 | 0.274864  | 543    | 0.458922   |
| 0.45322007 | 0.970119   | T          | C             | -0.0117252  | 0.00772981 | 0.129298  | 543    | 0.45322007 |
| 0.57121823 | 0.960638   | T          | G             | -0.0104068  | 0.00821462 | 0.205203  | 543    | 0.428782   |
| 0.46614641 | 0.985924   | C          | A             | -0.012706   | 0.00774329 | 0.100816  | 543    | 0.46614641 |
| 0.45753775 | 0.996347   | G          | A             | -0.0113569  | 0.0076602  | 0.138183  | 543    | 0.45753775 |
| 0.45948435 | 0.993668   | T          | G             | -0.00858144 | 0.00800685 | 0.283827  | 543    | 0.45948435 |
| 0.45948987 | 0.995636   | G          | A             | -0.00869235 | 0.00798029 | 0.276053  | 543    | 0.45948987 |
| 0.45456262 | 0.975495   | T          | C             | -0.0115877  | 0.00771876 | 0.133294  | 543    | 0.45456262 |

|            |          |   |   |             |            |           |     |            |
|------------|----------|---|---|-------------|------------|-----------|-----|------------|
| 0.45908195 | 0.983047 | T | G | -0.00764492 | 0.00814818 | 0.348123  | 543 | 0.45908195 |
| 0.54307919 | 0.997554 | G | C | 0.0113451   | 0.00764581 | 0.137852  | 543 | 0.456921   |
| 0.54307827 | 0.997558 | C | A | 0.0113445   | 0.00764579 | 0.137874  | 543 | 0.456922   |
| 0.4316779  | 0.988736 | G | A | 0.012126    | 0.00785497 | 0.122654  | 543 | 0.4316779  |
| 0.36804843 | 0.982422 | G | C | -0.00272745 | 0.00812059 | 0.73697   | 543 | 0.36804843 |
| 0.45691897 | 0.997553 | T | C | -0.0113456  | 0.00764581 | 0.137836  | 543 | 0.45691897 |
| 0.54308195 | 0.99755  | T | G | 0.0113462   | 0.00764582 | 0.137815  | 543 | 0.456918   |
| 0.45736924 | 0.99672  | G | A | -0.0113819  | 0.00765368 | 0.136984  | 543 | 0.45736924 |
| 0.45737109 | 0.996717 | G | A | -0.011382   | 0.00765367 | 0.136982  | 543 | 0.45737109 |
| 0.64137293 | 0.969265 | T | A | 0.00336041  | 0.00829215 | 0.685293  | 543 | 0.358627   |
| 0.57200092 | 0.959406 | T | C | -0.0106185  | 0.00822669 | 0.196796  | 543 | 0.427999   |
| 0.56235359 | 0.988854 | T | C | -0.0108465  | 0.00794866 | 0.172387  | 543 | 0.437646   |
| 0.37309853 | 0.997157 | T | C | -0.00481856 | 0.00791766 | 0.5428    | 543 | 0.37309853 |
| 0.88165838 | 0.970473 | T | G | -0.00763968 | 0.0119609  | 0.523003  | 543 | 0.118342   |
| 0.44195101 | 0.975386 | G | A | 0.00842891  | 0.00805541 | 0.295392  | 543 | 0.44195101 |
| 0.11871315 | 0.97708  | C | A | 0.00795742  | 0.0119383  | 0.505061  | 543 | 0.11871315 |
| 0.45435912 | 0.996356 | G | A | -0.0113565  | 0.00772852 | 0.141716  | 543 | 0.45435912 |
| 0.45435912 | 0.996356 | T | A | -0.0113565  | 0.00772852 | 0.141716  | 543 | 0.45435912 |
| 0.48123757 | 0.991337 | G | A | -0.00996079 | 0.00784058 | 0.203937  | 543 | 0.48123757 |
| 0.56348987 | 0.9926   | T | C | -0.0108145  | 0.00794266 | 0.173334  | 543 | 0.43651    |
| 0.83353591 | 0.973577 | G | A | -0.0090938  | 0.0099117  | 0.35889   | 543 | 0.166464   |
| 0.62696961 | 0.997072 | T | C | 0.00483154  | 0.0079174  | 0.5417    | 543 | 0.37303    |
| 0.52126703 | 0.996285 | T | A | 0.0114748   | 0.00787762 | 0.145219  | 543 | 0.478733   |
| 0.11921    | 0.988668 | C | A | 0.00837811  | 0.0119052  | 0.481597  | 543 | 0.11921    |
| 0.45436096 | 0.996379 | G | C | -0.0113562  | 0.00772845 | 0.141723  | 543 | 0.45436096 |
| 0.55253775 | 0.929136 | G | C | 0.0137417   | 0.00802022 | 0.0866426 | 543 | 0.447462   |
| 0.56200921 | 0.993575 | T | C | -0.010712   | 0.00795096 | 0.177897  | 543 | 0.437991   |
| 0.62678637 | 0.979427 | G | A | 0.004209    | 0.00797248 | 0.59754   | 543 | 0.373214   |
| 0.1309618  | 0.923353 | G | A | 0.0137601   | 0.0118015  | 0.243628  | 543 | 0.1309618  |
| 0.43715396 | 0.995151 | G | C | 0.0107899   | 0.00794355 | 0.174362  | 543 | 0.43715396 |
| 0.38537569 | 0.996956 | G | A | -0.00981888 | 0.00795422 | 0.217045  | 543 | 0.38537569 |
| 0.38558287 | 0.993777 | G | A | -0.0101803  | 0.00799874 | 0.203112  | 543 | 0.38558287 |
| 0.51660681 | 0.989133 | G | A | 0.00908687  | 0.00786849 | 0.248155  | 543 | 0.483393   |
| 0.51045764 | 0.961637 | G | A | 0.00965181  | 0.00809391 | 0.233074  | 543 | 0.489542   |
| 0.51874862 | 0.989337 | T | C | 0.0101464   | 0.00785672 | 0.196554  | 543 | 0.481251   |
| 0.52031676 | 0.997197 | G | C | 0.0112935   | 0.00788147 | 0.151882  | 543 | 0.479683   |
| 0.50969429 | 0.955598 | G | A | 0.00978531  | 0.00790963 | 0.216036  | 543 | 0.490306   |
| 0.2269663  | 0.90447  | T | C | -0.00278971 | 0.00962386 | 0.771913  | 543 | 0.2269663  |
| 0.47800092 | 0.997753 | G | A | -0.0110825  | 0.00785415 | 0.158234  | 543 | 0.47800092 |
| 0.42189669 | 0.978759 | T | A | 0.0152775   | 0.00798404 | 0.0556826 | 543 | 0.42189669 |
| 0.47768692 | 0.975452 | G | A | -0.010603   | 0.00789852 | 0.179467  | 543 | 0.47768692 |
| 0.34436556 | 0.986964 | T | C | 0.00990849  | 0.00781596 | 0.204896  | 543 | 0.34436556 |
| 0.58027256 | 0.988324 | G | A | -0.0130404  | 0.00791982 | 0.0996502 | 543 | 0.419727   |
| 0.42163112 | 0.995303 | G | A | 0.0130349   | 0.0078584  | 0.0971719 | 543 | 0.42163112 |
| 0.42154807 | 0.995632 | G | A | 0.0130904   | 0.00785495 | 0.0956099 | 543 | 0.42154807 |
| 0.42157735 | 0.99582  | G | C | 0.013064    | 0.00785565 | 0.09631   | 543 | 0.42157735 |
| 0.03104144 | 0.719309 | G | C | -0.0221084  | 0.0273471  | 0.41884   | 543 | 0.03104144 |

|            |          |   |   |             |            |           |     |            |
|------------|----------|---|---|-------------|------------|-----------|-----|------------|
| 0.42153039 | 0.995917 | G | A | 0.0130873   | 0.00785433 | 0.0956628 | 543 | 0.42153039 |
| 0.62990055 | 0.829774 | G | C | -0.00885344 | 0.00871733 | 0.309813  | 543 | 0.370099   |
| 0.89743554 | 0.95325  | T | C | -0.0012671  | 0.0128217  | 0.921277  | 543 | 0.102564   |
| 0.62997882 | 0.854452 | T | C | 0.002174    | 0.00848338 | 0.797746  | 543 | 0.370021   |
